# Supplementary material for: Identification of Novel Diagnostic Markers for Malignant Pleural Mesothelioma Using a Reverse Translational Approach Based on a Rare Synchronous Tumor
Source: Diagnostics (Basel). 2022 Jan 27;12(2):316. doi: 10.3390/diagnostics12020316 (PMC8871196; doi:10.3390/diagnostics12020316)
Supplement: Supplementary file 1 [file diagnostics-12-00316-s001.zip › Supplementary table (tomoaki naka).xlsx]

## Sheet: Title
Supplementary Dataset Identification of novel diagnostic markers for malignant pleural mesothelioma using a reverse translational approach based on a rare synchronous tumor Tomoaki Naka1,3, Yutaka Hatanaka1,2, Yukiko Tabata1,4, Akira Takasawa1, Hideo Akiyama2,5, Yasuhiro Hida4, Hiromi Okada1, Kanako C. Hatanaka1,2, Tomoko Mitsuhashi1, Kei Kushitani6, Vishwa Jeet Amatya6, Yukio Takeshima6, Kouki I…

## Sheet: increased
Name	Description				adeno #21	normal #50	ratio(adeno/normal)	LOG2[ratio(adeno/normal)]	up	down	meso #34	normal #50	ratio(meso/normal)	LOG2[ratio(meso/normal)]	up	down	MPM	PAC	Ratio (M/P)	LOG2 [ratio]	Up	Down	meso #34	MM01F	ratio(meso/MM01F)	LOG2[ratio(meso/MM01F)]	up	down
UPK1B	Uroplakin-1b (Uroplakin Ib) (UPIb) (Tetraspanin-20) (Tspan-20). [Source:Uniprot/SWISSPROT;Acc:O75841]	GO:0030855-epithelial cell differentiation	GO:0005198-structural molecule activity	GO:0016020-membrane;GO:0016021-integral to membrane	1.86867	3.56515	0.524149	-0.931951			1288.36	3.56515	361.374	8.49735	***		1288.36	1.86867	689.449	9.4293	***		1288.36	3462.83	0.372053	-1.42642		*
KRT5	Keratin, type II cytoskeletal 5 (Cytokeratin-5) (CK-5) (Keratin-5) (K5) (58 kDa cytokeratin). [Source:Uniprot/SWISSPROT;Acc:P13647]	GO:0008544-epidermis development	GO:0005198-structural molecule activity;GO:0005200-structural constituent of cytoskeleton;GO:0005515-protein binding	GO:0005882-intermediate filament	2.81547	18.1834	0.154837	-2.69118		**	669.694	18.1834	36.8299	5.20281	***		669.694	2.81547	237.862	7.89398	***		669.694	465.814	1.43769	0.52375
BDKRB1	B1 bradykinin receptor (BK-1 receptor) (B1R). [Source:Uniprot/SWISSPROT;Acc:P46663]	GO:0006954-inflammatory response;GO:0007165-signal transduction;GO:0007186-G-protein coupled receptor protein signaling pathway;GO:0007204-elevation of cytosolic calcium ion concentration	GO:0001584-rhodopsin-like receptor activity;GO:0004872-receptor activity;GO:0004947-bradykinin receptor activity	GO:0005783-endoplasmic reticulum;GO:0005886-plasma membrane;GO:0005887-integral to plasma membrane	2.78575	3.58281	0.777532	-0.363025			596.217	3.58281	166.411	7.3786	***		596.217	2.78575	214.024	7.74163	***		596.217	1278.23	0.466438	-1.10024		*
IRX1	Iroquois-class homeodomain protein IRX-1 (Iroquois homeobox protein 1) (Homeodomain protein IRXA1). [Source:Uniprot/SWISSPROT;Acc:P78414]	GO:0006355-regulation of transcription, DNA-dependent	GO:0003700-transcription factor activity;GO:0043565-sequence-specific DNA binding	GO:0005634-nucleus	2.01253	12.0892	0.166474	-2.58663		**	195.854	12.0892	16.2007	4.01799	***		195.854	2.01253	97.3172	6.60462	***		195.854	86.2152	2.27168	1.18376	*
REC8L1	Meiotic recombination protein REC8-like 1 (Cohesin Rec8p). [Source:Uniprot/SWISSPROT;Acc:O95072]	GO:0007062-sister chromatid cohesion;GO:0007126-meiosis;GO:0007131-meiotic recombination;GO:0007283-spermatogenesis	GO:0005515-protein binding	GO:0000228-nuclear chromosome;GO:0000800-lateral element;GO:0005634-nucleus	29.6325	13.3675	2.21676	1.14845	*		2041.68	13.3675	152.734	7.25488	***		2041.68	29.6325	68.8999	6.10643	***		2041.68	1929.2	1.0583	0.0817524
TRIM29	Tripartite motif-containing protein 29 (Ataxia-telangiectasia group D- associated protein). [Source:Uniprot/SWISSPROT;Acc:Q14134]	GO:0006366-transcription from RNA polymerase II promoter	GO:0003700-transcription factor activity;GO:0005515-protein binding;GO:0008270-zinc ion binding;GO:0046872-metal ion binding	GO:0005622-intracellular;GO:0005737-cytoplasm	19.8405	159.717	0.124223	-3.009		***	1236.2	159.717	7.7399	2.95231	**		1236.2	19.8405	62.3067	5.96132	***		1236.2	610.691	2.02426	1.01739	*
NP_115606.1	Uncharacterized protein C12orf26. [Source:Uniprot/SWISSPROT;Acc:Q8N6Q8]	-	-	-	3.44726	3.34865	1.02945	0.0418704			208.237	3.34865	62.1854	5.9585	***		208.237	3.44726	60.4065	5.91663	***		208.237	1367.88	0.152233	-2.71565		**
CLDN15	Mitochondrial fission 1 protein (Fis1 homolog) (hFis1) (Tetratricopeptide repeat protein 11) (TPR repeat protein 11). [Source:Uniprot/SWISSPROT;Acc:Q9Y3D6]	GO:0016338-calcium-independent cell-cell adhesion	GO:0005198-structural molecule activity;GO:0042802-identical protein binding	GO:0005923-tight junction;GO:0016020-membrane;GO:0016021-integral to membrane	5.40456	4.53156	1.19265	0.25417			319.909	4.53156	70.5959	6.14151	***		319.909	5.40456	59.1925	5.88734	***		319.909	116.033	2.75705	1.46312	*
EFEMP1	EGF-containing fibulin-like extracellular matrix protein 1 precursor (Fibulin-3) (FIBL-3) (Fibrillin-like protein) (Extracellular protein S1-5). [Source:Uniprot/SWISSPROT;Acc:Q12805]	GO:0007601-visual perception	GO:0005509-calcium ion binding;GO:0005515-protein binding	GO:0005578-proteinaceous extracellular matrix	85.4001	44.2763	1.9288	0.947701			4972.09	44.2763	112.297	6.81117	***		4972.09	85.4001	58.2211	5.86347	***		4972.09	12383.7	0.401503	-1.31652		*
FRAS1	Extracellular matrix protein FRAS1 precursor. [Source:Uniprot/SWISSPROT;Acc:Q86XX4]	GO:0002009-morphogenesis of an epithelium;GO:0007154-cell communication;GO:0007156-homophilic cell adhesion	GO:0005509-calcium ion binding;GO:0005515-protein binding	GO:0005604-basement membrane;GO:0016020-membrane;GO:0016021-integral to membrane	11.2048	8.94459	1.25269	0.325024			502.206	8.94459	56.1464	5.81112	***		502.206	11.2048	44.8208	5.4861	***		502.206	2059.06	0.2439	-2.03564		**
Q8N2J3_HUMAN	Protein Dok-7 (Downstream of tyrosine kinase 7). [Source:Uniprot/SWISSPROT;Acc:Q18PE1]	GO:0001934-positive regulation of protein amino acid phosphorylation;GO:0007528-neuromuscular junction development;GO:0043113-receptor clustering	GO:0005158-insulin receptor binding;GO:0005515-protein binding	GO:0016020-membrane;GO:0031594-neuromuscular junction	2.29941	7.63682	0.301095	-1.73171		*	86.0433	7.63682	11.2669	3.49402	***		86.0433	2.29941	37.4198	5.22573	***		86.0433	12.9494	6.64456	2.73217	**
PDZK2	PDZ domain-containing protein 3 (PDZ domain-containing protein 2) (Intestinal and kidney-enriched PDZ protein). [Source:Uniprot/SWISSPROT;Acc:Q86UT5]	GO:0006811-ion transport;GO:0006833-water transport;GO:0007168-receptor guanylyl cyclase signaling pathway;GO:0009636-response to toxin;GO:0019934-cGMP-mediated signaling;GO:0030827-negative regulation of cGMP biosynthetic process	GO:0008022-protein C-terminus binding;GO:0008200-ion channel inhibitor activity;GO:0030251-guanylate cyclase inhibitor activity	GO:0005624-membrane fraction;GO:0005829-cytosol;GO:0016020-membrane;GO:0035003-subapical complex;GO:0045177-apical part of cell	1.8071	3.60786	0.500877	-0.997471			62.1724	3.60786	17.2325	4.10706	***		62.1724	1.8071	34.4046	5.10453	***		62.1724	113.914	0.545784	-0.873599
PHGDH	D-3-phosphoglycerate dehydrogenase (EC 1.1.1.95) (3-PGDH). [Source:Uniprot/SWISSPROT;Acc:O43175]	GO:0006564-L-serine biosynthetic process;GO:0006810-transport;GO:0007420-brain development;GO:0008152-metabolic process;GO:0008652-amino acid biosynthetic process	GO:0004617-phosphoglycerate dehydrogenase activity;GO:0005215-transporter activity;GO:0009055-electron carrier activity;GO:0016491-oxidoreductase activity;GO:0016616-oxidoreductase activity, acting on the CH-OH group of donors, NAD or NADP as acceptor;GO:0048037-cofactor binding;GO:0051287-NAD binding	GO:0005576-extracellular region	32.2316	17.9908	1.79157	0.841221			834.88	17.9908	46.4061	5.53624	***		834.88	32.2316	25.9025	4.69502	***		834.88	664.516	1.25637	0.329265
IFITM1	Interferon-induced transmembrane protein 1 (Interferon-induced protein 17) (Interferon-inducible protein 9-27) (Leu-13 antigen) (CD225 antigen). [Source:Uniprot/SWISSPROT;Acc:P13164]	GO:0000074-regulation of progression through cell cycle;GO:0006955-immune response;GO:0007166-cell surface receptor linked signal transduction;GO:0008285-negative regulation of cell proliferation;GO:0009607-response to biotic stimulus	GO:0005057-receptor signaling protein activity;GO:0005515-protein binding	GO:0005886-plasma membrane;GO:0016021-integral to membrane	30.694	8.59168	3.57252	1.83694	*		776.946	8.59168	90.43	6.49873	***		776.946	30.694	25.3127	4.66179	***		776.946	1998.68	0.38873	-1.36316		*
OGN	Mimecan precursor (Osteoglycin) (Osteoinductive factor) (OIF). [Source:Uniprot/SWISSPROT;Acc:P20774]	GO:0008150-biological_process	GO:0003674-molecular_function;GO:0005515-protein binding;GO:0008083-growth factor activity	GO:0005575-cellular_component;GO:0005578-proteinaceous extracellular matrix;GO:0005783-endoplasmic reticulum	7.20991	9.01945	0.799373	-0.323059			180.771	9.01945	20.0423	4.32498	***		180.771	7.20991	25.0725	4.64804	***		180.771	671.127	0.269354	-1.89242		*
LY6G6C	Lymphocyte antigen 6 complex locus protein G6c precursor. [Source:Uniprot/SWISSPROT;Acc:O95867]	-	-	-	5.51227	4.92286	1.11973	0.16315			127.496	4.92286	25.8988	4.69482	***		127.496	5.51227	23.1295	4.53166	***		127.496	38.9877	3.27016	1.70936	*
HIST3H3	Histone H3.1t (H3t) (H3/t) (H3/g). [Source:Uniprot/SWISSPROT;Acc:Q16695]	GO:0006334-nucleosome assembly;GO:0007001-chromosome organization and biogenesis (sensu Eukaryota)	GO:0003677-DNA binding	GO:0000786-nucleosome;GO:0005634-nucleus;GO:0005694-chromosome	8.45979	18.9522	0.446376	-1.16367		*	192.153	18.9522	10.1388	3.34182	***		192.153	8.45979	22.7137	4.50549	***		192.153	596.131	0.322333	-1.63337		*
NDFIP2	NEDD4 family-interacting protein 2 (NEDD4 WW domain-binding protein 5A) (Putative MAPK-activating protein PM04/PM05/PM06/PM07) (Putative NF-kappa-B-activating protein 413). [Source:Uniprot/SWISSPROT;Acc:Q9NV92]	GO:0043123-positive regulation of I-kappaB kinase/NF-kappaB cascade	GO:0004871-signal transducer activity	GO:0016020-membrane;GO:0016021-integral to membrane	4.20678	4.34769	0.967591	-0.0475308			93.6503	4.34769	21.5402	4.42896	***		93.6503	4.20678	22.2617	4.47649	***		93.6503	282.946	0.330983	-1.59517		*
NP_006465.3	Podoplanin precursor (Glycoprotein 36) (Gp36) (PA2.26 antigen) (T1A) (T1-alpha) (Aggrus). [Source:Uniprot/SWISSPROT;Acc:Q86YL7]	GO:0000902-cell morphogenesis;GO:0001946-lymphangiogenesis;GO:0006833-water transport;GO:0006865-amino acid transport;GO:0007275-multicellular organismal development;GO:0008360-regulation of cell shape;GO:0015884-folic acid transport;GO:0030324-lung development;GO:0051272-positive regulation of cell motility	GO:0008517-folic acid transporter activity;GO:0015171-amino acid transporter activity;GO:0015250-water channel activity	GO:0001726-ruffle;GO:0005886-plasma membrane;GO:0005887-integral to plasma membrane;GO:0016021-integral to membrane;GO:0030027-lamellipodium;GO:0030175-filopodium	5.17842	3.41851	1.51482	0.599145			105.044	3.41851	30.7279	4.94148	***		105.044	5.17842	20.2849	4.34233	***		105.044	713.155	0.147294	-2.76323		**
SIGLEC11	Sialic acid-binding Ig-like lectin 11 precursor (Siglec-11) (Sialic acid-binding lectin 11). [Source:Uniprot/SWISSPROT;Acc:Q96RL6]	GO:0007155-cell adhesion	GO:0005515-protein binding;GO:0005529-sugar binding	GO:0016020-membrane;GO:0016021-integral to membrane	2.07565	2.06464	1.00533	0.00766922			39.5386	2.06464	19.1503	4.2593	***		39.5386	2.07565	19.0488	4.25163	***		39.5386	1.48281	26.6646	4.73686	***
LRRC1	Leucine-rich repeat-containing protein 1 (LAP and no PDZ protein) (LANO adapter protein). [Source:Uniprot/SWISSPROT;Acc:Q9BTT6]	-	GO:0005515-protein binding	GO:0016020-membrane	8.46931	2.32041	3.64992	1.86786	*		159.266	2.32041	68.6371	6.10092	***		159.266	8.46931	18.8051	4.23305	***		159.266	421.451	0.3779	-1.40392		*
CALB2	Calretinin (CR) (29 kDa calbindin). [Source:Uniprot/SWISSPROT;Acc:P22676]	-	GO:0005509-calcium ion binding	GO:0005921-gap junction	6.06649	8.30148	0.730772	-0.452506			106.55	8.30148	12.8351	3.68202	***		106.55	6.06649	17.5637	4.13453	***		106.55	192.957	0.552197	-0.856745
RL24_HUMAN	60S ribosomal protein L24 (Ribosomal protein L30). [Source:Uniprot/SWISSPROT;Acc:P83731]	GO:0006412-translation	GO:0003723-RNA binding;GO:0003735-structural constituent of ribosome;GO:0005515-protein binding	GO:0005622-intracellular;GO:0005840-ribosome;GO:0005842-cytosolic large ribosomal subunit (sensu Eukaryota)	242.797	366.282	0.662868	-0.593206			3631.35	366.282	9.91407	3.30948	***		3631.35	242.797	14.9563	3.90268	***		3631.35	12682.5	0.286326	-1.80427		*
C4A	complement component 4B preproprotein [Source:RefSeq_peptide;Acc:NP_001002029]	GO:0006954-inflammatory response;GO:0006956-complement activation;GO:0006958-complement activation, classical pathway;GO:0045087-innate immune response	GO:0004866-endopeptidase inhibitor activity	GO:0005576-extracellular region	126.961	156.501	0.811246	-0.301789			1818.24	156.501	11.6181	3.5383	***		1818.24	126.961	14.3213	3.84009	***		1818.24	517.865	3.51104	1.8119	*
GFPT2	Glucosamine--fructose-6-phosphate aminotransferase [isomerizing] 2 (EC 2.6.1.16) (Hexosephosphate aminotransferase 2) (D-fructose-6- phosphate amidotransferase 2) (GFAT 2) (GFAT2). [Source:Uniprot/SWISSPROT;Acc:O94808]	GO:0005975-carbohydrate metabolic process;GO:0006002-fructose 6-phosphate metabolic process;GO:0006112-energy reserve metabolic process;GO:0006541-glutamine metabolic process;GO:0008152-metabolic process;GO:0016051-carbohydrate biosynthetic process	GO:0004360-glutamine-fructose-6-phosphate transaminase (isomerizing) activity;GO:0005529-sugar binding;GO:0016740-transferase activity	GO:0005737-cytoplasm	46.7988	44.3224	1.05587	0.0784361			666.195	44.3224	15.0307	3.90984	***		666.195	46.7988	14.2353	3.8314	***		666.195	1774.46	0.375436	-1.41336		*
RBP4	Plasma retinol-binding protein precursor (PRBP) (RBP) [Contains: Plasma retinol-binding protein(1-182); Plasma retinol-binding protein(1-181); Plasma retinol-binding protein(1-179); Plasma retinol- binding protein(1-176)]. [Source:Uniprot/SWISSPROT;Acc:P02753]	GO:0006810-transport;GO:0007601-visual perception;GO:0050896-response to stimulus	GO:0005215-transporter activity;GO:0005488-binding;GO:0016918-retinal binding;GO:0019841-retinol binding	GO:0005576-extracellular region;GO:0005615-extracellular space	18.8203	17.8806	1.05256	0.0738971			258.214	17.8806	14.441	3.8521	***		258.214	18.8203	13.7199	3.7782	***		258.214	224.372	1.15083	0.202673
ANXA8	annexin A8-like 1 [Source:RefSeq_peptide;Acc:NP_001035173]	-	-	-	6.00245	5.07942	1.18172	0.240887			81.687	5.07942	16.0819	4.00737	***		81.687	6.00245	13.6089	3.76648	***		81.687	195.433	0.41798	-1.25849		*
RGMA	Repulsive guidance molecule A precursor (RGM domain family member A). [Source:Uniprot/SWISSPROT;Acc:Q96B86]	GO:0001843-neural tube closure	GO:0048503-GPI anchor binding	GO:0009986-cell surface;GO:0016020-membrane	10.5586	6.76917	1.5598	0.641363			143.376	6.76917	21.1808	4.40469	***		143.376	10.5586	13.5792	3.76332	***		143.376	66.5552	2.15425	1.10719	*
IFI27	Interferon-alpha-induced 11.5 kDa protein (p27) (ISG12(a) protein). [Source:Uniprot/SWISSPROT;Acc:P40305]	GO:0006955-immune response;GO:0008150-biological_process	GO:0003674-molecular_function	GO:0005783-endoplasmic reticulum;GO:0016020-membrane;GO:0016021-integral to membrane	1046.39	426.19	2.45522	1.29585	*		12693.6	426.19	29.7839	4.89646	***		12693.6	1046.39	12.1308	3.60061	***		12693.6	19447.7	0.652705	-0.615496
C20orf175	Uncharacterized protein C20orf175. [Source:Uniprot/SWISSPROT;Acc:Q96MK2]	-	-	-	8.34707	15.8621	0.526229	-0.926238			98.768	15.8621	6.22668	2.63846	**		98.768	8.34707	11.8326	3.5647	***		98.768	27.5504	3.58499	1.84197	*
PRSS11	Serine protease HTRA1 precursor (EC 3.4.21.-) (L56) (Serine protease 11). [Source:Uniprot/SWISSPROT;Acc:Q92743]	GO:0001558-regulation of cell growth;GO:0006508-proteolysis;GO:0030512-negative regulation of transforming growth factor beta receptor signaling pathway;GO:0030514-negative regulation of BMP signaling pathway	GO:0004252-serine-type endopeptidase activity;GO:0005515-protein binding;GO:0005520-insulin-like growth factor binding;GO:0008233-peptidase activity	GO:0005576-extracellular region;GO:0005615-extracellular space	19.4553	3.7742	5.15481	2.36592	**		222.517	3.7742	58.9575	5.8816	***		222.517	19.4553	11.4374	3.51568	***		222.517	1308.96	0.169995	-2.55643		**
Q9P079_HUMAN	erythropoietin 4 immediate early response [Source:RefSeq_peptide;Acc:NP_060941]	-	GO:0003676-nucleic acid binding;GO:0008270-zinc ion binding	-	6.9654	5.46377	1.27484	0.350311			74.7763	5.46377	13.6859	3.77461	***		74.7763	6.9654	10.7354	3.4243	***		74.7763	389.73	0.191867	-2.38182		**
G1P2	Interferon-induced 17 kDa protein precursor [Contains: Ubiquitin cross-reactive protein (hUCRP) (Interferon-induced 15 kDa protein)]. [Source:Uniprot/SWISSPROT;Acc:P05161]	GO:0006464-protein modification;GO:0006512-ubiquitin cycle;GO:0006955-immune response;GO:0007267-cell-cell signaling;GO:0009615-response to virus;GO:0032020-ISG15-protein conjugation	GO:0005515-protein binding	GO:0005615-extracellular space;GO:0005737-cytoplasm	99.8485	83.1914	1.20023	0.263306			1022.58	83.1914	12.2919	3.61964	***		1022.58	99.8485	10.2413	3.35633	***		1022.58	102.233	10.0025	3.32229	***
ASS	Argininosuccinate synthase (EC 6.3.4.5) (Citrulline--aspartate ligase). [Source:Uniprot/SWISSPROT;Acc:P00966]	GO:0000050-urea cycle;GO:0006526-arginine biosynthetic process;GO:0008652-amino acid biosynthetic process	GO:0000166-nucleotide binding;GO:0004055-argininosuccinate synthase activity;GO:0005515-protein binding;GO:0005524-ATP binding;GO:0016874-ligase activity	GO:0005737-cytoplasm	7.54676	3.82845	1.97123	0.979098			76.548	3.82845	19.9945	4.32153	***		76.548	7.54676	10.1432	3.34243	***		76.548	531.748	0.143955	-2.79631		**
-	-	GO:0006350-transcription;GO:0006355-regulation of transcription, DNA-dependent	GO:0003677-DNA binding;GO:0008270-zinc ion binding;GO:0046872-metal ion binding	GO:0005622-intracellular;GO:0005634-nucleus	3.10832	2.15426	1.44288	0.528946			31.5138	2.15426	14.6286	3.87072	***		31.5138	3.10832	10.1385	3.34178	***		31.5138	274.77	0.114692	-3.12417		***
TB22A_HUMAN	TBC1 domain family member 22A. [Source:Uniprot/SWISSPROT;Acc:Q8WUA7]	GO:0032313-regulation of Rab GTPase activity	GO:0005096-GTPase activator activity;GO:0005097-Rab GTPase activator activity	GO:0005622-intracellular	7.18374	6.03953	1.18945	0.250297			72.6817	6.03953	12.0343	3.58908	***		72.6817	7.18374	10.1175	3.33879	***		72.6817	26.9584	2.69607	1.43086	*
C1S	Complement C1s subcomponent precursor (EC 3.4.21.42) (C1 esterase) [Contains: Complement C1s subcomponent heavy chain; Complement C1s subcomponent light chain]. [Source:Uniprot/SWISSPROT;Acc:P09871]	GO:0006508-proteolysis;GO:0006958-complement activation, classical pathway;GO:0007186-G-protein coupled receptor protein signaling pathway;GO:0008150-biological_process;GO:0045087-innate immune response	GO:0001584-rhodopsin-like receptor activity;GO:0003674-molecular_function;GO:0003816-complement component C1s activity;GO:0005509-calcium ion binding	GO:0005575-cellular_component;GO:0005576-extracellular region;GO:0016021-integral to membrane	210.415	25.9374	8.1124	3.02013	***		2117.89	25.9374	81.6537	6.35145	***		2117.89	210.415	10.0653	3.33132	***		2117.89	6240.94	0.339354	-1.55914		*
-	-	GO:0007275-multicellular organismal development;GO:0030154-cell differentiation;GO:0045668-negative regulation of osteoblast differentiation;GO:0045892-negative regulation of transcription, DNA-dependent	GO:0003677-DNA binding;GO:0016564-transcriptional repressor activity	GO:0005634-nucleus;GO:0005737-cytoplasm	7.94218	8.24457	0.963323	-0.0539089			77.98	8.24457	9.45835	3.24159	***		77.98	7.94218	9.81846	3.2955	***		77.98	31.6086	2.46705	1.30279	*
NP_001060.1	Tubulin beta-2A chain. [Source:Uniprot/SWISSPROT;Acc:Q13885]	GO:0007018-microtubule-based movement;GO:0051258-protein polymerization	GO:0000166-nucleotide binding;GO:0003924-GTPase activity;GO:0005200-structural constituent of cytoskeleton;GO:0005525-GTP binding	GO:0005737-cytoplasm;GO:0005856-cytoskeleton;GO:0005874-microtubule;GO:0043234-protein complex	15.4068	10.8216	1.42371	0.509654			148.094	10.8216	13.685	3.77453	***		148.094	15.4068	9.61224	3.26487	***		148.094	210.729	0.702769	-0.508878
CDK2AP1	Cyclin-dependent kinase 2-associated protein 1 (CDK2-associated protein 1) (Putative oral cancer suppressor) (Deleted in oral cancer 1) (DOC-1). [Source:Uniprot/SWISSPROT;Acc:O14519]	GO:0000084-S phase of mitotic cell cycle;GO:0006261-DNA-dependent DNA replication;GO:0006468-protein amino acid phosphorylation;GO:0007049-cell cycle;GO:0045786-negative regulation of progression through cell cycle	GO:0003677-DNA binding;GO:0004871-signal transducer activity;GO:0005515-protein binding	GO:0005634-nucleus;GO:0005737-cytoplasm	137.932	25.4981	5.40949	2.43549	**		1300.54	25.4981	51.0054	5.67258	***		1300.54	137.932	9.42887	3.23708	***		1300.54	2948.22	0.441127	-1.18074		*
CD44	CD44 antigen precursor (Phagocytic glycoprotein I) (PGP-1) (HUTCH-I) (Extracellular matrix receptor-III) (ECMR-III) (GP90 lymphocyte homing/adhesion receptor) (Hermes antigen) (Hyaluronate receptor) (Heparan sulfate proteoglycan) (Epican) (CDw44). [Source:Uniprot/SWISSPROT;Acc:P16070]	GO:0001658-ureteric bud branching;GO:0007155-cell adhesion;GO:0007160-cell-matrix adhesion;GO:0016337-cell-cell adhesion	GO:0003674-molecular_function;GO:0004872-receptor activity;GO:0005518-collagen binding;GO:0005540-hyaluronic acid binding	GO:0005575-cellular_component;GO:0005887-integral to plasma membrane;GO:0009897-external side of plasma membrane;GO:0016020-membrane	7.95679	16.2166	0.490658	-1.02721		*	73.9579	16.2166	4.56063	2.18923	**		73.9579	7.95679	9.29494	3.21645	***		73.9579	30.8194	2.39972	1.26287	*
KLK11	Kallikrein-11 precursor (EC 3.4.21.-) (Hippostasin) (Trypsin-like protease) (Serine protease 20). [Source:Uniprot/SWISSPROT;Acc:Q9UBX7]	GO:0006508-proteolysis	GO:0004252-serine-type endopeptidase activity;GO:0008233-peptidase activity	-	49.8543	4.58587	10.8713	3.44245	***		457.63	4.58587	99.7915	6.64085	***		457.63	49.8543	9.17935	3.19839	***		457.63	797.278	0.573991	-0.800901
TUFT1	Tuftelin. [Source:Uniprot/SWISSPROT;Acc:Q9NNX1]	GO:0030282-bone mineralization;GO:0042476-odontogenesis	GO:0005515-protein binding;GO:0030345-structural constituent of tooth enamel	GO:0005576-extracellular region;GO:0005737-cytoplasm	24.6186	4.31109	5.71052	2.51362	**		225.749	4.31109	52.3647	5.71052	***		225.749	24.6186	9.16986	3.1969	***		225.749	501.865	0.449821	-1.15258		*
KLK10	Kallikrein-10 precursor (EC 3.4.21.-) (Protease serine-like 1) (Normal epithelial cell-specific 1). [Source:Uniprot/SWISSPROT;Acc:O43240]	GO:0006508-proteolysis;GO:0007049-cell cycle;GO:0045786-negative regulation of progression through cell cycle	GO:0004252-serine-type endopeptidase activity	GO:0005576-extracellular region	42.2901	36.2911	1.1653	0.220707			387.67	36.2911	10.6822	3.41714	***		387.67	42.2901	9.16691	3.19644	***		387.67	547.217	0.70844	-0.497282
XP_497569.1	-	-	-	-	4.25709	1.97323	2.15742	1.10931	*		38.7417	1.97323	19.6336	4.29525	***		38.7417	4.25709	9.10051	3.18595	***		38.7417	92.8268	0.417355	-1.26065		*
SLC9A3R1	Ezrin-radixin-moesin-binding phosphoprotein 50 (EBP50) (Na(+)/H(+) exchange regulatory cofactor NHE-RF) (NHERF-1) (Regulatory cofactor of Na(+)/H(+) exchanger) (Sodium-hydrogen exchanger regulatory factor 1) (Solute carrier family 9 isoform 3 regulatory f [Source:Uniprot/SWISSPROT;Acc:O14745]	GO:0006461-protein complex assembly;GO:0016055-Wnt receptor signaling pathway;GO:0030643-phosphate ion homeostasis	GO:0005515-protein binding;GO:0017155-sodium:hydrogen antiporter regulator activity;GO:0031698-beta-2 adrenergic receptor binding	GO:0015629-actin cytoskeleton;GO:0016324-apical plasma membrane	7.87743	9.61479	0.819303	-0.287531			71.3162	9.61479	7.41734	2.8909	**		71.3162	7.87743	9.05323	3.17843	***		71.3162	212.251	0.336	-1.57347		*
ZNF302	Zinc finger protein 302 (ZNF135-like) (ZNF140-like). [Source:Uniprot/SWISSPROT;Acc:Q9NR11]	-	-	-	2.36553	3.54109	0.668025	-0.582027			21.396	3.54109	6.04221	2.59508	**		21.396	2.36553	9.0449	3.1771	***		21.396	91.568	0.233662	-2.0975		**
SLC7A4	Cationic amino acid transporter 4 (CAT-4) (CAT4). [Source:Uniprot/SWISSPROT;Acc:O43246]	GO:0006520-amino acid metabolic process;GO:0006810-transport;GO:0006865-amino acid transport	GO:0015174-basic amino acid transporter activity	GO:0016020-membrane;GO:0016021-integral to membrane	17.1223	18.067	0.947707	-0.0774866			153.897	18.067	8.5181	3.09053	***		153.897	17.1223	8.98812	3.16802	***		153.897	38.7824	3.96821	1.98849	*
PITPNC1	phosphatidylinositol transfer protein, cytoplasmic 1 isoform b [Source:RefSeq_peptide;Acc:NP_858057]	GO:0006810-transport;GO:0007165-signal transduction	GO:0008526-phosphatidylinositol transporter activity	GO:0005622-intracellular;GO:0005737-cytoplasm	17.7525	16.5181	1.07472	0.103967			158.09	16.5181	9.57069	3.25862	***		158.09	17.7525	8.90525	3.15466	***		158.09	230.725	0.68519	-0.545425
ID2	DNA-binding protein inhibitor ID-2 (Inhibitor of DNA binding 2). [Source:Uniprot/SWISSPROT;Acc:Q02363]	GO:0007275-multicellular organismal development;GO:0007507-heart development;GO:0016481-negative regulation of transcription;GO:0043433-negative regulation of transcription factor activity	GO:0005515-protein binding;GO:0016564-transcriptional repressor activity	GO:0005634-nucleus;GO:0005737-cytoplasm	2.89888	2.29239	1.26457	0.338645			25.0958	2.29239	10.9474	3.45252	***		25.0958	2.89888	8.65707	3.11388	***		25.0958	530.944	0.0472664	-4.40304		***
PTGS1	Prostaglandin G/H synthase 1 precursor (EC 1.14.99.1) (Cyclooxygenase- 1) (COX-1) (Prostaglandin-endoperoxide synthase 1) (Prostaglandin H2 synthase 1) (PGH synthase 1) (PGHS-1) (PHS 1). [Source:Uniprot/SWISSPROT;Acc:P23219]	GO:0001516-prostaglandin biosynthetic process;GO:0006629-lipid metabolic process;GO:0006633-fatty acid biosynthetic process;GO:0008217-blood pressure regulation;GO:0030216-keratinocyte differentiation	GO:0004601-peroxidase activity;GO:0004666-prostaglandin-endoperoxide synthase activity;GO:0005506-iron ion binding;GO:0016491-oxidoreductase activity;GO:0016702-oxidoreductase activity, acting on single donors with incorporation of molecular oxygen, incorporation of two atoms of oxygen;GO:0046872-metal ion binding	GO:0005634-nucleus;GO:0005737-cytoplasm;GO:0005792-microsome;GO:0016020-membrane	3.68913	3.26248	1.13078	0.177312			31.8208	3.26248	9.75357	3.28593	***		31.8208	3.68913	8.62556	3.10862	***		31.8208	137.142	0.232028	-2.10763		**
XP_084845.5	similar to Interferon-induced transmembrane protein 3 (Interferon-inducible protein 1-8U) (LOC650205), mRNA [Source:RefSeq_dna;Acc:XR_018421]	GO:0009607-response to biotic stimulus	-	GO:0016021-integral to membrane	50.5424	9.65516	5.23475	2.38812	**		435.621	9.65516	45.1179	5.49563	***		435.621	50.5424	8.61892	3.10751	***		435.621	1343.49	0.324246	-1.62484		*
IGKC	Immunoglobulin Kappa light chain C gene segment [Source:IMGT/GENE-DB;Acc:IGKC]	-	-	-	6.1314	8.06966	0.759809	-0.39629			52.7801	8.06966	6.54056	2.70941	**		52.7801	6.1314	8.60816	3.1057	***		52.7801	675.242	0.0781647	-3.67734		***
CRIP1	Cysteine-rich protein 1 (Cysteine-rich intestinal protein) (CRIP) (Cysteine-rich heart protein) (hCRHP). [Source:Uniprot/SWISSPROT;Acc:P50238]	GO:0008283-cell proliferation	GO:0008270-zinc ion binding;GO:0046872-metal ion binding	GO:0005737-cytoplasm	1470.11	1623.33	0.905612	-0.143034			12039.4	1623.33	7.41648	2.89073	**		12039.4	1470.11	8.18946	3.03377	***		12039.4	1820.28	6.61401	2.72553	**
-	-	GO:0006816-calcium ion transport;GO:0006874-calcium ion homeostasis;GO:0006916-anti-apoptosis;GO:0042981-regulation of apoptosis	GO:0005509-calcium ion binding	GO:0005615-extracellular space;GO:0005737-cytoplasm;GO:0005771-multivesicular body;GO:0045298-tubulin complex	8.418	9.52332	0.883935	-0.177988			66.8843	9.52332	7.02321	2.81213	**		66.8843	8.418	7.9454	2.99012	**		66.8843	11182.1	0.00598135	-7.38531		***
PTPLA	protein tyrosine phosphatase-like, member A [Source:RefSeq_peptide;Acc:NP_055056]	GO:0006470-protein amino acid dephosphorylation;GO:0007165-signal transduction;GO:0007275-multicellular organismal development	GO:0004725-protein tyrosine phosphatase activity	-	9.06327	4.75436	1.90631	0.93078			71.6428	4.75436	15.0689	3.9135	***		71.6428	9.06327	7.90474	2.98272	**		71.6428	302.779	0.236618	-2.07937		**
RHPN2	Rhophilin-2 (GTP-Rho-binding protein 2) (76 kDa RhoB effector protein) (p76RBE). [Source:Uniprot/SWISSPROT;Acc:Q8IUC4]	GO:0007165-signal transduction	GO:0005515-protein binding	GO:0005622-intracellular	44.9829	21.8669	2.05712	1.04063	*		354.371	21.8669	16.2058	4.01844	***		354.371	44.9829	7.87792	2.97781	**		354.371	672.366	0.527051	-0.923986
S10AA_HUMAN	Protein S100-A10 (S100 calcium-binding protein A10) (Calpactin-1 light chain) (Calpactin I light chain) (p10 protein) (p11) (Cellular ligand of annexin II). [Source:Uniprot/SWISSPROT;Acc:P60903]	GO:0007165-signal transduction	GO:0005102-receptor binding;GO:0005509-calcium ion binding	-	425.51	96.5751	4.406	2.13947	**		3333.63	96.5751	34.5185	5.1093	***		3333.63	425.51	7.83443	2.96983	**		3333.63	4247.85	0.78478	-0.349639
XP_165448.3	60S acidic ribosomal protein P0 (L10E). [Source:Uniprot/SWISSPROT;Acc:P05388]	-	-	-	4.46323	2.03878	2.18917	1.13038	*		34.6308	2.03878	16.9861	4.08628	***		34.6308	4.46323	7.75913	2.9559	**		34.6308	4016.94	0.00862119	-6.8579		***
-	Uncharacterized protein C10orf53. [Source:Uniprot/SWISSPROT;Acc:Q8N6V4]	-	-	-	2.74125	4.26035	0.643432	-0.636141			21.1181	4.26035	4.95689	2.30943	**		21.1181	2.74125	7.70383	2.94558	**		21.1181	9.18251	2.29982	1.20152	*
H4_HUMAN	Histone H4. [Source:Uniprot/SWISSPROT;Acc:P62805]	-	-	-	5.41429	12.4034	0.436515	-1.1959		*	41.685	12.4034	3.36076	1.74879	*		41.685	5.41429	7.69908	2.94469	**		41.685	17.7367	2.35022	1.23279	*
STMN3	Stathmin-3 (SCG10-like protein). [Source:Uniprot/SWISSPROT;Acc:Q9NZ72]	GO:0007242-intracellular signaling cascade;GO:0007399-nervous system development	-	-	68.2941	38.3774	1.77954	0.831505			511.345	38.3774	13.3241	3.73597	***		511.345	68.2941	7.4874	2.90446	**		511.345	402.496	1.27044	0.345323
PCNXL3	CDNA: FLJ22427 fis, clone HRC09013. [Source:Uniprot/SPTREMBL;Acc:Q9H6A9]	-	-	GO:0016021-integral to membrane	39.0972	51.3402	0.761532	-0.393024			287.13	51.3402	5.59268	2.48354	**		287.13	39.0972	7.34399	2.87657	**		287.13	134.6	2.13321	1.09303	*
DAB2	Disabled homolog 2 (Differentially expressed protein 2) (DOC-2). [Source:Uniprot/SWISSPROT;Acc:P98082]	GO:0008283-cell proliferation	GO:0008022-protein C-terminus binding	GO:0005905-coated pit	8.51948	3.06369	2.7808	1.4755	*		61.1552	3.06369	19.9613	4.31914	***		61.1552	8.51948	7.17828	2.84364	**		61.1552	157.566	0.388124	-1.36541		*
CLTB	Clathrin light chain B (Lcb). [Source:Uniprot/SWISSPROT;Acc:P09497]	GO:0006886-intracellular protein transport	GO:0003674-molecular_function;GO:0005509-calcium ion binding	GO:0005905-coated pit;GO:0030125-clathrin vesicle coat	78.3572	144.696	0.54153	-0.884888			557.574	144.696	3.85342	1.94614	*		557.574	78.3572	7.1158	2.83103	**		557.574	90.0854	6.1894	2.6298	**
CYP4F12	-	GO:0006118-electron transport	GO:0004497-monooxygenase activity;GO:0005506-iron ion binding;GO:0020037-heme binding;GO:0046872-metal ion binding;GO:0050381-unspecific monooxygenase activity	GO:0005783-endoplasmic reticulum;GO:0005792-microsome;GO:0016020-membrane;GO:0016021-integral to membrane	17.4042	36.691	0.474346	-1.07599		*	123.463	36.691	3.36495	1.75058	*		123.463	17.4042	7.09386	2.82657	**		123.463	87.3121	1.41404	0.499826
TPT1	Translationally-controlled tumor protein (TCTP) (p23) (Histamine- releasing factor) (HRF) (Fortilin). [Source:Uniprot/SWISSPROT;Acc:P13693]	GO:0006816-calcium ion transport;GO:0006874-calcium ion homeostasis;GO:0006916-anti-apoptosis;GO:0042981-regulation of apoptosis	GO:0005509-calcium ion binding	GO:0005615-extracellular space;GO:0005737-cytoplasm;GO:0005771-multivesicular body;GO:0045298-tubulin complex	947.329	126.541	7.48632	2.90426	**		6633.18	126.541	52.419	5.71202	***		6633.18	947.329	7.00198	2.80776	**		6633.18	32279	0.205495	-2.28282		**
PLXDC2	Plexin domain-containing protein 2 precursor (Tumor endothelial marker 7-related protein). [Source:Uniprot/SWISSPROT;Acc:Q6UX71]	GO:0007275-multicellular organismal development	GO:0004872-receptor activity	GO:0016020-membrane;GO:0016021-integral to membrane	16.4038	9.13215	1.79627	0.845001			114.73	9.13215	12.5633	3.65114	***		114.73	16.4038	6.9941	2.80614	**		114.73	463.629	0.24746	-2.01473		**
XP_209741.2	Translationally-controlled tumor protein (TCTP) (p23) (Histamine- releasing factor) (HRF) (Fortilin). [Source:Uniprot/SWISSPROT;Acc:P13693]	-	-	-	17.6693	4.94057	3.57636	1.83849	*		122.275	4.94057	24.7491	4.62931	***		122.275	17.6693	6.9202	2.79081	**		122.275	14684.1	0.00832702	-6.90798		***
-	-	-	-	-	6.74402	2.01897	3.34033	1.73999	*		46.4805	2.01897	23.0219	4.52494	***		46.4805	6.74402	6.8921	2.78494	**		46.4805	3908.77	0.0118913	-6.39395		***
NP_057086.2	Probable saccharopine dehydrogenase (EC 1.5.1.9). [Source:Uniprot/SWISSPROT;Acc:Q8NBX0]	-	GO:0016491-oxidoreductase activity;GO:0047131-saccharopine dehydrogenase (NAD+, L-glutamate-forming) activity	-	16.1295	2.52784	6.38076	2.67373	**		110.923	2.52784	43.8807	5.45551	***		110.923	16.1295	6.87703	2.78179	**		110.923	829.55	0.133715	-2.90277		**
PTEN_HUMAN	Phosphatidylinositol-3,4,5-trisphosphate 3-phosphatase and dual- specificity protein phosphatase PTEN (EC 3.1.3.67) (EC 3.1.3.16) (EC 3.1.3.48) (Phosphatase and tensin homolog) (Mutated in multiple advanced cancers 1). [Source:Uniprot/SWISSPROT;Acc:P60484]	GO:0006470-protein amino acid dephosphorylation	GO:0008138-protein tyrosine/serine/threonine phosphatase activity;GO:0016791-phosphoric monoester hydrolase activity	-	6.18538	2.73077	2.26507	1.17955	*		41.6769	2.73077	15.2619	3.93187	***		41.6769	6.18538	6.73797	2.75231	**		41.6769	91.0871	0.457549	-1.128		*
SLC20A1	Sodium-dependent phosphate transporter 1 (Solute carrier family 20 member 1) (Phosphate transporter 1) (PiT-1) (Gibbon ape leukemia virus receptor 1) (GLVR-1) (Leukemia virus receptor 1 homolog). [Source:Uniprot/SWISSPROT;Acc:Q8WUM9]	GO:0006796-phosphate metabolic process;GO:0006810-transport;GO:0006817-phosphate transport;GO:0043123-positive regulation of I-kappaB kinase/NF-kappaB cascade	GO:0004872-receptor activity;GO:0005315-inorganic phosphate transporter activity;GO:0005436-sodium:phosphate symporter activity;GO:0015293-symporter activity	GO:0005887-integral to plasma membrane;GO:0016020-membrane	17.4442	2.36336	7.38108	2.88383	**		117.353	2.36336	49.655	5.63387	***		117.353	17.4442	6.72734	2.75004	**		117.353	739.156	0.158766	-2.65503		**
INPP5E	72 kDa inositol polyphosphate 5-phosphatase (EC 3.1.3.36) (Phosphatidylinositol-4,5-bisphosphate 5-phosphatase) (Phosphatidylinositol polyphosphate 5-phosphatase type IV). [Source:Uniprot/SWISSPROT;Acc:Q9NRR6]	GO:0006629-lipid metabolic process;GO:0008150-biological_process	GO:0004437-inositol or phosphatidylinositol phosphatase activity;GO:0004439-phosphoinositide 5-phosphatase activity;GO:0004445-inositol-polyphosphate 5-phosphatase activity;GO:0016787-hydrolase activity	GO:0000139-Golgi membrane;GO:0005575-cellular_component	4.12288	5.59009	0.737532	-0.439221			27.6359	5.59009	4.94373	2.3056	**		27.6359	4.12288	6.70306	2.74482	**		27.6359	3.89507	7.0951	2.82682	**
SOCS5	Suppressor of cytokine signaling 5 (SOCS-5) (Cytokine-inducible SH2- containing protein 5) (Cytokine-inducible SH2 protein 6) (CIS-6). [Source:Uniprot/SWISSPROT;Acc:O75159]	GO:0001558-regulation of cell growth;GO:0007173-epidermal growth factor receptor signaling pathway;GO:0007242-intracellular signaling cascade;GO:0007259-JAK-STAT cascade;GO:0009968-negative regulation of signal transduction;GO:0019221-cytokine and chemokine mediated signaling pathway;GO:0045627-positive regulation of T-helper 1 cell differentiation;GO:0045629-negative regulation of T-helper 2 cel…	GO:0005154-epidermal growth factor receptor binding;GO:0005515-protein binding;GO:0019210-kinase inhibitor activity	GO:0005737-cytoplasm	5.56328	2.71411	2.04976	1.03546	*		37.1667	2.71411	13.6939	3.77546	***		37.1667	5.56328	6.68071	2.74	**		37.1667	104.792	0.354672	-1.49544		*
DNAJC14	DnaJ homolog subfamily C member 14 (Dopamine receptor-interacting protein of 78 kDa) (DRiP78). [Source:Uniprot/SWISSPROT;Acc:Q6Y2X3]	GO:0006457-protein folding;GO:0015031-protein transport	GO:0031072-heat shock protein binding;GO:0051082-unfolded protein binding	GO:0005783-endoplasmic reticulum;GO:0016020-membrane;GO:0016021-integral to membrane	8.4266	10.5772	0.796673	-0.327941			56.2492	10.5772	5.31795	2.41087	**		56.2492	8.4266	6.6752	2.73881	**		56.2492	39.3669	1.42884	0.514848
NP_060312.1	-	-	-	-	93.6897	92.7909	1.00969	0.0139076			624.605	92.7909	6.73132	2.75089	**		624.605	93.6897	6.66674	2.73698	**		624.605	219.786	2.84188	1.50685	*
-	similar to Interferon-induced transmembrane protein 3 (Interferon-inducible protein 1-8U) (LOC650205), mRNA [Source:RefSeq_dna;Acc:XR_018421]	-	-	-	49.7657	9.55018	5.21098	2.38155	**		328.827	9.55018	34.4315	5.10566	***		328.827	49.7657	6.60749	2.7241	**		328.827	1206.42	0.272564	-1.87533		*
-	Small inducible cytokine A4 precursor (CCL4) (Macrophage inflammatory protein 1-beta) (MIP-1-beta) (MIP-1-beta(1-69)) (T-cell activation protein 2) (ACT-2) (PAT 744) (H400) (SIS-gamma) (Lymphocyte activation gene 1 protein) (LAG-1) (HC21) (G-26 T-lymphocy [Source:Uniprot/SWISSPROT;Acc:P13236]	GO:0006928-cell motility;GO:0006935-chemotaxis;GO:0006954-inflammatory response;GO:0006955-immune response;GO:0007155-cell adhesion;GO:0007163-establishment and/or maintenance of cell polarity;GO:0007165-signal transduction;GO:0007267-cell-cell signaling;GO:0009615-response to virus;GO:0019079-viral genome replication	GO:0004716-receptor signaling protein tyrosine kinase activity;GO:0008009-chemokine activity	GO:0005576-extracellular region;GO:0005615-extracellular space	25.3217	31.7248	0.798168	-0.325235			166.109	31.7248	5.23593	2.38844	**		166.109	25.3217	6.55993	2.71368	**		166.109	224.157	0.741037	-0.432382
SULF2	Extracellular sulfatase Sulf-2 precursor (EC 3.1.6.-) (HSulf-2). [Source:Uniprot/SWISSPROT;Acc:Q8IWU5]	GO:0008152-metabolic process;GO:0030201-heparan sulfate proteoglycan metabolic process	GO:0004065-arylsulfatase activity;GO:0005509-calcium ion binding;GO:0008484-sulfuric ester hydrolase activity;GO:0016787-hydrolase activity	GO:0005615-extracellular space;GO:0005783-endoplasmic reticulum;GO:0009986-cell surface	39.1506	85.908	0.455728	-1.13376		*	245.436	85.908	2.85697	1.51448	*		245.436	39.1506	6.26902	2.64824	**		245.436	339.204	0.723565	-0.466805
C10orf116	Adipose most abundant gene transcript 2. [Source:Uniprot/SWISSPROT;Acc:Q15847]	GO:0008150-biological_process	GO:0003674-molecular_function	GO:0005575-cellular_component	64.6263	37.4464	1.72583	0.787294			395.67	37.4464	10.5663	3.4014	***		395.67	64.6263	6.12244	2.61411	**		395.67	612.798	0.645678	-0.631113
IGKC	-	-	-	-	548.611	1107	0.495585	-1.0128		*	3358.41	1107	3.0338	1.60113	*		3358.41	548.611	6.12165	2.61392	**		3358.41	2543.44	1.32042	0.400997
ATP5J2	ATP synthase f chain, mitochondrial (EC 3.6.3.14). [Source:Uniprot/SWISSPROT;Acc:P56134]	GO:0006754-ATP biosynthetic process;GO:0006811-ion transport;GO:0015992-proton transport	GO:0015078-hydrogen ion transporter activity;GO:0046872-metal ion binding	GO:0005739-mitochondrion;GO:0005753-mitochondrial proton-transporting ATP synthase complex;GO:0045263-proton-transporting ATP synthase complex, coupling factor F(o)	156.321	53.6049	2.91617	1.54408	*		953.738	53.6049	17.792	4.15316	***		953.738	156.321	6.10115	2.60908	**		953.738	612.739	1.55652	0.638321
DIRAS1	GTP-binding protein Di-Ras1 (Distinct subgroup of the Ras family member 1) (Ras-related inhibitor of cell growth) (Rig protein) (Small GTP-binding tumor suppressor 1). [Source:Uniprot/SWISSPROT;Acc:O95057]	GO:0007264-small GTPase mediated signal transduction	GO:0000166-nucleotide binding;GO:0005525-GTP binding	GO:0005622-intracellular;GO:0016020-membrane	13.9536	12.501	1.1162	0.158598			84.9058	12.501	6.79194	2.76382	**		84.9058	13.9536	6.08486	2.60522	**		84.9058	19.5398	4.34528	2.11945	**
-	immunoglobulin kappa constant , immunoglobulin kappa variable 1-5	6955 // immune response // non-traceable author statement /// 6955 // immune response // inferred from electronic annotation /// 19883 // antigen presentation, endogenous antigen // inferred from electronic annotation /// 19885 // antigen processing, endo	5576 // extracellular region // non-traceable author statement /// 16020 // membrane // inferred from electronic annotation /// 16021 // integral to membrane // inferred from electronic annotation	3823 // antigen binding // non-traceable author statement /// 30106 // MHC class I receptor activity // inferred from electronic annotation	122.51	256.025	0.478506	-1.06339		*	735.184	256.025	2.87153	1.52182	*		735.184	122.51	6.00103	2.58521	**		735.184	374.103	1.96519	0.974671
-	-	-	-	-	1013.32	336.029	3.01557	1.59243	*		6080.85	336.029	18.0962	4.17761	***		6080.85	1013.32	6.00092	2.58518	**		6080.85	17713.8	0.343284	-1.54253		*
RBM25	Probable RNA-binding protein 25 (RNA-binding motif protein 25) (RNA- binding region-containing protein 7) (Protein S164). [Source:Uniprot/SWISSPROT;Acc:P49756]	GO:0000398-nuclear mRNA splicing, via spliceosome	GO:0000166-nucleotide binding;GO:0003676-nucleic acid binding;GO:0003729-mRNA binding	GO:0005575-cellular_component	9.19744	6.02083	1.5276	0.611269			54.7153	6.02083	9.08767	3.18391	***		54.7153	9.19744	5.94898	2.57264	**		54.7153	65.0513	0.841111	-0.249633
JMJD2A	JmjC domain-containing histone demethylation protein 3A (EC 1.14.11.-) (Jumonji domain-containing protein 2A). [Source:Uniprot/SWISSPROT;Acc:O75164]	GO:0006350-transcription;GO:0006355-regulation of transcription, DNA-dependent;GO:0016568-chromatin modification;GO:0016577-histone demethylation	GO:0003676-nucleic acid binding;GO:0005506-iron ion binding;GO:0005515-protein binding;GO:0008270-zinc ion binding;GO:0016491-oxidoreductase activity;GO:0016564-transcriptional repressor activity;GO:0016702-oxidoreductase activity, acting on single donors with incorporation of molecular oxygen, incorporation of two atoms of oxygen;GO:0046872-metal ion binding;GO:0051864-histone demethylase activi…	GO:0005634-nucleus	22.5253	6.99341	3.22093	1.68748	*		133.981	6.99341	19.1582	4.25989	***		133.981	22.5253	5.94804	2.57241	**		133.981	220.328	0.6081	-0.71762
ANXA2	Annexin A2 (Annexin II) (Lipocortin II) (Calpactin I heavy chain) (Chromobindin-8) (p36) (Protein I) (Placental anticoagulant protein IV) (PAP-IV). [Source:Uniprot/SWISSPROT;Acc:P07355]	GO:0001501-skeletal development	GO:0004859-phospholipase inhibitor activity;GO:0005509-calcium ion binding;GO:0005544-calcium-dependent phospholipid binding;GO:0008092-cytoskeletal protein binding	GO:0005625-soluble fraction;GO:0005886-plasma membrane	87.4036	27.5697	3.17028	1.66461	*		510.6	27.5697	18.5203	4.21104	***		510.6	87.4036	5.84186	2.54643	**		510.6	4247.82	0.120203	-3.05646		***
NDUFB1	NADH dehydrogenase [ubiquinone] 1 beta subcomplex subunit 1 (EC 1.6.5.3) (EC 1.6.99.3) (NADH-ubiquinone oxidoreductase MNLL subunit) (Complex I-MNLL) (CI-MNLL). [Source:Uniprot/SWISSPROT;Acc:O75438]	GO:0006120-mitochondrial electron transport, NADH to ubiquinone	GO:0003954-NADH dehydrogenase activity;GO:0008137-NADH dehydrogenase (ubiquinone) activity;GO:0016491-oxidoreductase activity	GO:0005739-mitochondrion;GO:0005747-mitochondrial respiratory chain complex I	25.3244	4.54525	5.57162	2.4781	**		147.376	4.54525	32.4242	5.019	***		147.376	25.3244	5.81953	2.5409	**		147.376	1021.63	0.144256	-2.79329		**
C5orf4	Uncharacterized protein C5orf4. [Source:Uniprot/SWISSPROT;Acc:Q96IV6]	GO:0008152-metabolic process	GO:0003824-catalytic activity	GO:0016020-membrane;GO:0016021-integral to membrane	31.9746	7.26312	4.40233	2.13827	**		185.107	7.26312	25.4859	4.67163	***		185.107	31.9746	5.78919	2.53336	**		185.107	316.154	0.585498	-0.772264
RPLP0	-	GO:0006414-translational elongation;GO:0042254-ribosome biogenesis and assembly	GO:0003723-RNA binding;GO:0003735-structural constituent of ribosome;GO:0005515-protein binding	GO:0005622-intracellular;GO:0005840-ribosome;GO:0005842-cytosolic large ribosomal subunit (sensu Eukaryota)	2647.07	886.391	2.98635	1.57838	*		15168.4	886.391	17.1125	4.09698	***		15168.4	2647.07	5.73026	2.5186	**		15168.4	33740.6	0.449559	-1.15342		*
G1P3	Interferon-induced protein 6-16 precursor (Ifi-6-16) (Interferon alpha-inducible protein 6). [Source:Uniprot/SWISSPROT;Acc:P09912]	GO:0001836-release of cytochrome c from mitochondria;GO:0006916-anti-apoptosis;GO:0006955-immune response;GO:0043154-negative regulation of caspase activity;GO:0051902-negative regulation of mitochondrial depolarization	GO:0005515-protein binding	GO:0005739-mitochondrion;GO:0016020-membrane;GO:0016021-integral to membrane	1206.23	708.966	1.70139	0.766715			6892.69	708.966	9.72218	3.28128	***		6892.69	1206.23	5.71425	2.51457	**		6892.69	2224.76	3.09817	1.63142	*
PSMB9	Proteasome subunit beta type 9 precursor (EC 3.4.25.1) (Proteasome chain 7) (Macropain chain 7) (Multicatalytic endopeptidase complex chain 7) (RING12 protein) (Low molecular mass protein 2). [Source:Uniprot/SWISSPROT;Acc:P28065]	GO:0006508-proteolysis;GO:0006511-ubiquitin-dependent protein catabolic process;GO:0006955-immune response;GO:0019882-antigen processing and presentation	GO:0004298-threonine endopeptidase activity	GO:0005829-cytosol;GO:0005839-proteasome core complex (sensu Eukaryota)	201.861	105.004	1.92241	0.942914			1144.12	105.004	10.8959	3.44572	***		1144.12	201.861	5.66785	2.5028	**		1144.12	1923.68	0.594754	-0.749635
RL41_HUMAN	60S ribosomal protein L41 (HG12). [Source:Uniprot/SWISSPROT;Acc:P62945]	GO:0006412-translation	GO:0003723-RNA binding;GO:0003735-structural constituent of ribosome	GO:0005840-ribosome;GO:0005842-cytosolic large ribosomal subunit (sensu Eukaryota)	1261.95	314.841	4.00822	2.00296	**		7144.92	314.841	22.6937	4.50422	***		7144.92	1261.95	5.6618	2.50126	**		7144.92	19361.7	0.369023	-1.43822		*
CTSW	Cathepsin W precursor (EC 3.4.22.-) (Lymphopain). [Source:Uniprot/SWISSPROT;Acc:P56202]	GO:0006508-proteolysis;GO:0006955-immune response	GO:0004197-cysteine-type endopeptidase activity	-	21.6406	25.8248	0.837975	-0.255021			122.451	25.8248	4.74159	2.24537	**		122.451	21.6406	5.65839	2.50039	**		122.451	17.4381	7.02202	2.81189	**
XP_372878.2	-	-	GO:0000166-nucleotide binding	-	125.985	24.6448	5.11206	2.35391	**		706.459	24.6448	28.6657	4.84125	***		706.459	125.985	5.60747	2.48735	**		706.459	3860.9	0.182978	-2.45026		**
XPNPEP1	Xaa-Pro aminopeptidase 1 (EC 3.4.11.9) (X-Pro aminopeptidase 1) (X- prolyl aminopeptidase 1, soluble) (Cytosolic aminopeptidase P) (Soluble aminopeptidase P) (sAmp) (Aminoacylproline aminopeptidase). [Source:Uniprot/SWISSPROT;Acc:Q9NQW7]	GO:0006508-proteolysis;GO:0006600-creatine metabolic process	GO:0004177-aminopeptidase activity;GO:0008235-metalloexopeptidase activity;GO:0008451-X-Pro aminopeptidase activity;GO:0016787-hydrolase activity;GO:0016980-creatinase activity;GO:0030145-manganese ion binding;GO:0046872-metal ion binding	GO:0005737-cytoplasm	5.67583	2.30627	2.46104	1.29927	*		31.7139	2.30627	13.7512	3.78149	***		31.7139	5.67583	5.58754	2.48221	**		31.7139	144.057	0.220148	-2.18346		**
CHSP1_HUMAN	Calcium-regulated heat stable protein 1 (Calcium-regulated heat-stable protein of 24 kDa) (CRHSP-24). [Source:Uniprot/SWISSPROT;Acc:Q9Y2V2]	GO:0006355-regulation of transcription, DNA-dependent;GO:0007242-intracellular signaling cascade	GO:0003677-DNA binding;GO:0019902-phosphatase binding	-	54.9287	55.1664	0.995692	-0.0062285			304.177	55.1664	5.5138	2.46305	**		304.177	54.9287	5.53766	2.46928	**		304.177	451.158	0.674212	-0.568725
MARVELD1	MARVEL domain-containing protein 1. [Source:Uniprot/SWISSPROT;Acc:Q9BSK0]	-	-	-	61.3671	8.68882	7.06276	2.82023	**		339.783	8.68882	39.1057	5.28931	***		339.783	61.3671	5.53689	2.46908	**		339.783	791.479	0.429301	-1.21994		*
NP_612381.1	-	-	GO:0003676-nucleic acid binding;GO:0008270-zinc ion binding;GO:0046872-metal ion binding	GO:0005622-intracellular;GO:0005634-nucleus	5.638	3.91368	1.44059	0.526657			31.1023	3.91368	7.94706	2.99042	**		31.1023	5.638	5.51654	2.46376	**		31.1023	472.793	0.0657842	-3.92612		***
O14835_HUMAN	Thioredoxin-like protein 4A (Thioredoxin-like U5 snRNP protein U5- 15kD) (Spliceosomal U5 snRNP-specific 15 kDa protein) (DIM1 protein homolog). [Source:Uniprot/SWISSPROT;Acc:P83876]	GO:0000245-spliceosome assembly;GO:0006397-mRNA processing;GO:0007049-cell cycle;GO:0007067-mitosis;GO:0008380-RNA splicing;GO:0051301-cell division	GO:0031202-RNA splicing factor activity, transesterification mechanism	GO:0005634-nucleus;GO:0005681-spliceosome	13.4627	8.20791	1.64021	0.713878			74.1934	8.20791	9.03926	3.1762	***		74.1934	13.4627	5.51105	2.46233	**		74.1934	385.218	0.192601	-2.37631		**
NCBP2	-	GO:0006408-snRNA export from nucleus;GO:0006810-transport;GO:0008380-RNA splicing;GO:0046833-positive regulation of RNA export from nucleus;GO:0051028-mRNA transport	GO:0000166-nucleotide binding;GO:0000339-RNA cap binding;GO:0003676-nucleic acid binding;GO:0005515-protein binding	GO:0005634-nucleus	6.55437	2.66628	2.45825	1.29763	*		35.9653	2.66628	13.4889	3.75371	***		35.9653	6.55437	5.48722	2.45607	**		35.9653	230.352	0.156132	-2.67916		**
-	-	-	-	-	5.55552	2.4165	2.29899	1.201	*		30.4619	2.4165	12.6058	3.65602	***		30.4619	5.55552	5.48318	2.45501	**		30.4619	1183.66	0.0257354	-5.2801		***
HINT1	Histidine triad nucleotide-binding protein 1 (Adenosine 5'- monophosphoramidase) (Protein kinase C inhibitor 1) (Protein kinase C- interacting protein 1) (PKCI-1). [Source:Uniprot/SWISSPROT;Acc:P49773]	GO:0007165-signal transduction	GO:0005080-protein kinase C binding;GO:0008270-zinc ion binding;GO:0016787-hydrolase activity	GO:0005634-nucleus;GO:0005856-cytoskeleton	104.501	16.4051	6.37005	2.6713	**		572.106	16.4051	34.8738	5.12407	***		572.106	104.501	5.47465	2.45277	**		572.106	2942.75	0.194412	-2.36281		**
TST	Thiosulfate sulfurtransferase (EC 2.8.1.1) (Rhodanese). [Source:Uniprot/SWISSPROT;Acc:Q16762]	GO:0008272-sulfate transport;GO:0009440-cyanate catabolic process	GO:0004792-thiosulfate sulfurtransferase activity;GO:0016740-transferase activity	GO:0005739-mitochondrion;GO:0005743-mitochondrial inner membrane;GO:0005759-mitochondrial matrix	65.1282	11.6562	5.58742	2.48218	**		355.154	11.6562	30.4691	4.92927	***		355.154	65.1282	5.45316	2.44709	**		355.154	362.191	0.980571	-0.0283056
-	Elongation factor 1-beta (EF-1-beta). [Source:Uniprot/SWISSPROT;Acc:P24534]	GO:0006414-translational elongation	GO:0003746-translation elongation factor activity;GO:0005515-protein binding	GO:0005853-eukaryotic translation elongation factor 1 complex	35.8678	2.56839	13.9651	3.80375	***		192.675	2.56839	75.0179	6.22916	***		192.675	35.8678	5.37182	2.42541	**		192.675	7877.91	0.0244576	-5.35357		***
NP_000583.1	complement component 4B preproprotein [Source:RefSeq_peptide;Acc:NP_001002029]	GO:0006954-inflammatory response;GO:0006956-complement activation;GO:0006958-complement activation, classical pathway;GO:0045087-innate immune response	GO:0004866-endopeptidase inhibitor activity	GO:0005576-extracellular region	5.81568	10.2681	0.566383	-0.820149			31.1195	10.2681	3.0307	1.59965	*		31.1195	5.81568	5.35097	2.4198	**		31.1195	166.925	0.186428	-2.42331		**
Q8NHA7_HUMAN	Olfactory receptor 10C1 (Hs6M1-17). [Source:Uniprot/SWISSPROT;Acc:Q96KK4]	GO:0007165-signal transduction;GO:0007186-G-protein coupled receptor protein signaling pathway;GO:0007608-sensory perception of smell;GO:0050896-response to stimulus	GO:0004872-receptor activity;GO:0004984-olfactory receptor activity	GO:0016020-membrane;GO:0016021-integral to membrane	18.7837	35.5288	0.528689	-0.919509			100.23	35.5288	2.82108	1.49625	*		100.23	18.7837	5.33599	2.41576	**		100.23	56.2325	1.78242	0.833835
ZNFEB_HUMAN	zinc finger protein 271 [Source:RefSeq_peptide;Acc:NP_006620]	GO:0006350-transcription;GO:0006355-regulation of transcription, DNA-dependent	GO:0003677-DNA binding;GO:0008270-zinc ion binding;GO:0046872-metal ion binding	GO:0005622-intracellular;GO:0005634-nucleus	6.9533	3.8806	1.79181	0.841419			36.8756	3.8806	9.50257	3.24832	***		36.8756	6.9533	5.30333	2.4069	**		36.8756	110.81	0.332781	-1.58735		*
VIL2	Ezrin (p81) (Cytovillin) (Villin-2). [Source:Uniprot/SWISSPROT;Acc:P15311]	GO:0007016-cytoskeletal anchoring;GO:0008360-regulation of cell shape;GO:0051017-actin filament bundle formation	GO:0005198-structural molecule activity;GO:0008092-cytoskeletal protein binding;GO:0043621-protein self-association;GO:0051015-actin filament binding	GO:0001726-ruffle;GO:0005737-cytoplasm;GO:0005829-cytosol;GO:0005856-cytoskeleton;GO:0005884-actin filament;GO:0005902-microvillus;GO:0016020-membrane;GO:0019898-extrinsic to membrane;GO:0030863-cortical cytoskeleton	33.0302	23.4023	1.41141	0.497133			174.922	23.4023	7.47457	2.90199	**		174.922	33.0302	5.29583	2.40486	**		174.922	245.209	0.71336	-0.487299
SEMA3B	Semaphorin-3B precursor (Semaphorin V) (Sema V) (Sema A(V)). [Source:Uniprot/SWISSPROT;Acc:Q13214]	GO:0007267-cell-cell signaling;GO:0007275-multicellular organismal development;GO:0007411-axon guidance	GO:0004872-receptor activity	GO:0005783-endoplasmic reticulum;GO:0016020-membrane	57.902	59.43	0.974289	-0.0375781			305.168	59.43	5.13492	2.36034	**		305.168	57.902	5.27043	2.39792	**		305.168	33.0842	9.22399	3.20539	***
ALDH2	Aldehyde dehydrogenase, mitochondrial precursor (EC 1.2.1.3) (ALDH class 2) (ALDHI) (ALDH-E2). [Source:Uniprot/SWISSPROT;Acc:P05091]	GO:0005975-carbohydrate metabolic process;GO:0006066-alcohol metabolic process;GO:0008152-metabolic process	GO:0004029-aldehyde dehydrogenase (NAD) activity;GO:0004030-aldehyde dehydrogenase [NAD(P)+] activity;GO:0009055-electron carrier activity;GO:0016491-oxidoreductase activity	GO:0005739-mitochondrion	4.31637	2.91803	1.47921	0.564824			22.6155	2.91803	7.75027	2.95425	**		22.6155	4.31637	5.23948	2.38942	**		22.6155	359.002	0.0629955	-3.98861		***
TPM4_HUMAN	Tropomyosin alpha-4 chain (Tropomyosin-4) (TM30p1). [Source:Uniprot/SWISSPROT;Acc:P67936]	GO:0006928-cell motility	GO:0003779-actin binding;GO:0008307-structural constituent of muscle	GO:0005856-cytoskeleton;GO:0005862-muscle thin filament tropomyosin	10.2973	5.68501	1.81131	0.857034			53.8961	5.68501	9.48038	3.24495	***		53.8961	10.2973	5.23399	2.38791	**		53.8961	309.977	0.173871	-2.52391		**
-	-	-	-	-	291.443	56.8534	5.12623	2.3579	**		1524.54	56.8534	26.8152	4.74498	***		1524.54	291.443	5.23098	2.38708	**		1524.54	10848.3	0.140532	-2.83103		**
GZMK	Granzyme K precursor (EC 3.4.21.-) (Granzyme-3) (NK-tryptase-2) (NK- TRYP-2) (Fragmentin-3). [Source:Uniprot/SWISSPROT;Acc:P49863]	GO:0006508-proteolysis	GO:0004252-serine-type endopeptidase activity	GO:0005737-cytoplasm	10.5662	2.22283	4.75348	2.24898	**		55.2353	2.22283	24.8491	4.63512	***		55.2353	10.5662	5.22757	2.38614	**		55.2353	67.6458	0.816537	-0.292409
ACTN1	Alpha-actinin-1 (Alpha-actinin cytoskeletal isoform) (Non-muscle alpha-actinin-1) (F-actin cross-linking protein). [Source:Uniprot/SWISSPROT;Acc:P12814]	GO:0042981-regulation of apoptosis;GO:0048041-focal adhesion formation;GO:0051017-actin filament bundle formation;GO:0051271-negative regulation of cell motility	GO:0003779-actin binding;GO:0005178-integrin binding;GO:0005509-calcium ion binding;GO:0005515-protein binding;GO:0017166-vinculin binding;GO:0051015-actin filament binding	GO:0005856-cytoskeleton;GO:0005925-focal adhesion;GO:0030018-Z disc;GO:0031143-pseudopodium	36.5135	37.9239	0.96281	-0.0546773			189.762	37.9239	5.00376	2.32301	**		189.762	36.5135	5.19704	2.37769	**		189.762	225.177	0.842724	-0.246869
LDHA	L-lactate dehydrogenase A chain (EC 1.1.1.27) (LDH-A) (LDH muscle subunit) (LDH-M) (Proliferation-inducing gene 19 protein) (Renal carcinoma antigen NY-REN-59). [Source:Uniprot/SWISSPROT;Acc:P00338]	GO:0006100-tricarboxylic acid cycle intermediate metabolic process;GO:0019642-anaerobic glycolysis	GO:0004459-L-lactate dehydrogenase activity;GO:0005515-protein binding;GO:0016491-oxidoreductase activity	GO:0005737-cytoplasm;GO:0005829-cytosol	202.528	19.7628	10.248	3.35727	***		1051.98	19.7628	53.2305	5.73418	***		1051.98	202.528	5.19425	2.37692	**		1051.98	6005.86	0.175159	-2.51326		**
-	CDNA FLJ45422 fis, clone BRHIP3036715, moderately similar to HLA class I histocompatibility antigen, alpha chain H. [Source:Uniprot/SPTREMBL;Acc:Q6ZSK9]	GO:0002474-antigen processing and presentation of peptide antigen via MHC class I;GO:0006955-immune response;GO:0019882-antigen processing and presentation	-	GO:0016020-membrane;GO:0016021-integral to membrane;GO:0042612-MHC class I protein complex	10.755	6.48792	1.65769	0.729177			55.8154	6.48792	8.60296	3.10483	***		55.8154	10.755	5.18972	2.37566	**		55.8154	388.627	0.143622	-2.79965		**
RS29_HUMAN	40S ribosomal protein S29. [Source:Uniprot/SWISSPROT;Acc:P62273]	GO:0006412-translation	GO:0003723-RNA binding;GO:0003735-structural constituent of ribosome;GO:0005515-protein binding;GO:0008270-zinc ion binding;GO:0046872-metal ion binding	GO:0005622-intracellular;GO:0005840-ribosome;GO:0005843-cytosolic small ribosomal subunit (sensu Eukaryota)	315.534	37.0452	8.51754	3.09044	***		1632.71	37.0452	44.0734	5.46184	***		1632.71	315.534	5.17442	2.3714	**		1632.71	6071.68	0.268905	-1.89483		*
ANXA4	Annexin A4 (Annexin IV) (Lipocortin IV) (Endonexin I) (Chromobindin-4) (Protein II) (P32.5) (Placental anticoagulant protein II) (PAP-II) (PP4-X) (35-beta calcimedin) (Carbohydrate-binding protein P33/P41) (P33/41). [Source:Uniprot/SWISSPROT;Acc:P09525]	GO:0006916-anti-apoptosis;GO:0007165-signal transduction;GO:0050819-negative regulation of coagulation	GO:0004859-phospholipase inhibitor activity;GO:0005509-calcium ion binding;GO:0005544-calcium-dependent phospholipid binding	GO:0005737-cytoplasm	85.2848	44.303	1.92504	0.944886			434.474	44.303	9.80689	3.2938	***		434.474	85.2848	5.09439	2.34891	**		434.474	1221.47	0.355697	-1.49128		*
OLFM1	Noelin precursor (Neuronal olfactomedin-related ER localized protein) (Olfactomedin-1). [Source:Uniprot/SWISSPROT;Acc:Q99784]	GO:0007275-multicellular organismal development;GO:0007399-nervous system development;GO:0051259-protein oligomerization	GO:0005515-protein binding;GO:0016524-latrotoxin receptor activity	GO:0005783-endoplasmic reticulum;GO:0016020-membrane	5.83692	2.75349	2.11983	1.08395	*		29.4267	2.75349	10.6871	3.41779	***		29.4267	5.83692	5.04148	2.33385	**		29.4267	100.324	0.293318	-1.76946		*
NP_060020.1	mesoderm induction early response 1, family member 2 [Source:RefSeq_peptide;Acc:NP_060020]	-	-	-	13.9233	15.0579	0.924656	-0.113011			70.1506	15.0579	4.65873	2.21994	**		70.1506	13.9233	5.03834	2.33295	**		70.1506	22.5149	3.11574	1.63958	*
C14orf65	-	-	-	-	10.6472	7.89876	1.34796	0.430775			53.455	7.89876	6.76752	2.75863	**		53.455	10.6472	5.02057	2.32785	**		53.455	191.371	0.279327	-1.83997		*
SGNE1	Neuroendocrine protein 7B2 precursor (Secretogranin-5) (Secretogranin V) (Secretory granule endocrine protein I) (Pituitary polypeptide) [Contains: N-terminal peptide; C-terminal peptide]. [Source:Uniprot/SWISSPROT;Acc:P05408]	GO:0006457-protein folding;GO:0006810-transport;GO:0006886-intracellular protein transport;GO:0007218-neuropeptide signaling pathway;GO:0016486-peptide hormone processing;GO:0046883-regulation of hormone secretion	GO:0004857-enzyme inhibitor activity;GO:0005525-GTP binding;GO:0008047-enzyme activator activity;GO:0051082-unfolded protein binding	GO:0030141-secretory granule	17.5315	9.86439	1.77725	0.82965			87.897	9.86439	8.91053	3.15551	***		87.897	17.5315	5.01365	2.32586	**		87.897	90.7596	0.968459	-0.0462375
Q8NCR4_HUMAN	Coiled-coil domain-containing protein 46. [Source:Uniprot/SWISSPROT;Acc:Q8N8E3]	-	-	-	4.43543	2.0012	2.21639	1.14821	*		22.1708	2.0012	11.0788	3.46973	***		22.1708	4.43543	4.99857	2.32152	**		22.1708	215.674	0.102798	-3.28212		***
XP_208300.2	similar to 60S ribosomal protein L23a (LOC442260), mRNA [Source:RefSeq_dna;Acc:XR_017246]	-	-	-	188.514	34.8983	5.40181	2.43344	**		941.896	34.8983	26.9897	4.75434	***		941.896	188.514	4.99642	2.3209	**		941.896	4816.27	0.195565	-2.35428		**
Q6IPX2_HUMAN	40S ribosomal protein S18 (Ke-3) (Ke3). [Source:Uniprot/SWISSPROT;Acc:P62269]	GO:0006412-translation	GO:0003735-structural constituent of ribosome;GO:0019843-rRNA binding	GO:0005622-intracellular;GO:0005840-ribosome	75.981	2.58104	29.4381	4.87962	***		378.902	2.58104	146.802	7.19773	***		378.902	75.981	4.9868	2.31811	**		378.902	11355.5	0.0333672	-4.90543		***
SEMA4D	Semaphorin-4D precursor (Leukocyte activation antigen CD100) (BB18) (A8) (GR3). [Source:Uniprot/SWISSPROT;Acc:Q92854]	GO:0006916-anti-apoptosis;GO:0006955-immune response;GO:0007155-cell adhesion;GO:0007275-multicellular organismal development;GO:0007399-nervous system development;GO:0030154-cell differentiation;GO:0050772-positive regulation of axonogenesis	GO:0004872-receptor activity;GO:0005102-receptor binding	GO:0016020-membrane;GO:0016021-integral to membrane	14.4907	7.42013	1.95289	0.965612			71.8831	7.42013	9.68758	3.27614	***		71.8831	14.4907	4.96063	2.31052	**		71.8831	39.2799	1.83002	0.871863
NP_689529.1	Uncharacterized protein C11orf46. [Source:Uniprot/SWISSPROT;Acc:Q8N8R7]	-	-	-	6.05505	4.98235	1.2153	0.281313			29.9535	4.98235	6.01193	2.58783	**		29.9535	6.05505	4.94687	2.30652	**		29.9535	95.3886	0.314016	-1.67109		*
IGHG3	Immunoglobulin heavy chain C gene segment [Source:IMGT/GENE-DB;Acc:IGHG3]	-	-	-	5.10345	4.96685	1.0275	0.0391406			25.2439	4.96685	5.08248	2.34553	**		25.2439	5.10345	4.94645	2.30639	**		25.2439	68.3117	0.369541	-1.4362		*
Q96ES8_HUMAN	smooth muscle myosin heavy chain 11 isoform SM1-like [Source:RefSeq_peptide;Acc:NP_694539]	-	-	-	19.417	12.1375	1.59975	0.677844			95.3628	12.1375	7.85686	2.97395	**		95.3628	19.417	4.91131	2.29611	**		95.3628	215.558	0.442399	-1.17658		*
Q9NSN4_HUMAN	vasculin [Source:RefSeq_peptide;Acc:NP_075064]	-	-	GO:0043234-protein complex	51.7845	25.4678	2.03333	1.02384	*		253.981	25.4678	9.97261	3.31797	***		253.981	51.7845	4.90457	2.29413	**		253.981	797.988	0.318276	-1.65165		*
-	-	-	-	-	31.7284	7.80636	4.06443	2.02305	**		155.569	7.80636	19.9285	4.31676	***		155.569	31.7284	4.90315	2.29371	**		155.569	871.589	0.178489	-2.48609		**
NM_000407.3	-	GO:0000910-cytokinesis;GO:0007049-cell cycle;GO:0016080-synaptic vesicle targeting;GO:0017157-regulation of exocytosis	GO:0000166-nucleotide binding;GO:0003924-GTPase activity;GO:0005198-structural molecule activity;GO:0005515-protein binding;GO:0005525-GTP binding	GO:0005886-plasma membrane;GO:0008021-synaptic vesicle	17.0696	25.1648	0.678313	-0.559977			83.3288	25.1648	3.31132	1.72741	*		83.3288	17.0696	4.8817	2.28738	**		83.3288	25.4327	3.27644	1.71213	*
NP_116225.1	Flt3-interacting zinc finger protein 1 (Zinc finger protein 798). [Source:Uniprot/SWISSPROT;Acc:Q96SL8]	GO:0006350-transcription;GO:0006355-regulation of transcription, DNA-dependent	GO:0003676-nucleic acid binding;GO:0005102-receptor binding;GO:0008270-zinc ion binding;GO:0019901-protein kinase binding;GO:0046872-metal ion binding	GO:0005622-intracellular;GO:0005634-nucleus;GO:0005737-cytoplasm	8.09201	9.25368	0.874464	-0.193529			39.4077	9.25368	4.2586	2.09038	**		39.4077	8.09201	4.86995	2.28391	**		39.4077	23.3074	1.69078	0.757686
Q9HC19_HUMAN	Transmembrane BAX inhibitor motif-containing protein 4 (Z-protein) (S1R protein). [Source:Uniprot/SWISSPROT;Acc:Q9HC24]	-	GO:0005515-protein binding	GO:0016020-membrane;GO:0016021-integral to membrane	30.1828	4.37805	6.89413	2.78537	**		146.719	4.37805	33.5125	5.06663	***		146.719	30.1828	4.86101	2.28126	**		146.719	1754.66	0.0836167	-3.58006		***
PRKCDBP	protein kinase C, delta binding protein [Source:RefSeq_peptide;Acc:NP_659477]	-	GO:0016301-kinase activity	-	19.7553	5.06456	3.90071	1.96374	*		95.9835	5.06456	18.952	4.24428	***		95.9835	19.7553	4.85861	2.28054	**		95.9835	73.6299	1.30359	0.382494
C13orf12	Proteasome maturation protein (Proteassemblin) (Protein UMP1 homolog) (hUMP1) (Voltage-gated K channel beta subunit 4.1). [Source:Uniprot/SWISSPROT;Acc:Q9Y244]	GO:0006457-protein folding;GO:0006955-immune response	-	GO:0005634-nucleus;GO:0005829-cytosol;GO:0043234-protein complex	21.5231	6.93521	3.10345	1.63387	*		104.566	6.93521	15.0775	3.91433	***		104.566	21.5231	4.8583	2.28045	**		104.566	605.563	0.172675	-2.53387		**
RL41_HUMAN	-	GO:0006412-translation	GO:0003723-RNA binding;GO:0003735-structural constituent of ribosome	GO:0005840-ribosome;GO:0005842-cytosolic large ribosomal subunit (sensu Eukaryota)	1078.69	88.8419	12.1416	3.60189	***		5229.81	88.8419	58.8665	5.87937	***		5229.81	1078.69	4.84832	2.27748	**		5229.81	17416.4	0.30028	-1.73562		*
MAF	Transcription factor Maf (Proto-oncogene c-maf). [Source:Uniprot/SWISSPROT;Acc:O75444]	GO:0001816-cytokine production;GO:0006355-regulation of transcription, DNA-dependent;GO:0006366-transcription from RNA polymerase II promoter;GO:0045944-positive regulation of transcription from RNA polymerase II promoter	GO:0003700-transcription factor activity;GO:0003702-RNA polymerase II transcription factor activity;GO:0043565-sequence-specific DNA binding;GO:0046983-protein dimerization activity	GO:0000785-chromatin;GO:0005634-nucleus;GO:0005737-cytoplasm	4.75115	3.49553	1.35921	0.442765			23.0066	3.49553	6.5817	2.71846	**		23.0066	4.75115	4.84231	2.2757	**		23.0066	74.6072	0.308369	-1.69727		*
O60886_HUMAN	-	GO:0006412-translation	GO:0003735-structural constituent of ribosome	GO:0005622-intracellular;GO:0005840-ribosome	194.642	26.9316	7.22728	2.85345	**		939.08	26.9316	34.8691	5.12388	***		939.08	194.642	4.82465	2.27043	**		939.08	6589.1	0.14252	-2.81076		**
PYCARD	Apoptosis-associated speck-like protein containing a CARD (hASC) (PYD and CARD domain-containing protein) (Target of methylation-induced silencing 1) (Caspase recruitment domain-containing protein 5). [Source:Uniprot/SWISSPROT;Acc:Q9ULZ3]	GO:0006508-proteolysis;GO:0006917-induction of apoptosis;GO:0006919-caspase activation;GO:0006954-inflammatory response;GO:0007049-cell cycle;GO:0007165-signal transduction;GO:0045786-negative regulation of progression through cell cycle;GO:0050718-positive regulation of interleukin-1 beta secretion	GO:0005515-protein binding;GO:0008656-caspase activator activity;GO:0030693-caspase activity;GO:0032090-Pyrin domain binding;GO:0042803-protein homodimerization activity	GO:0005576-extracellular region;GO:0005622-intracellular;GO:0005737-cytoplasm;GO:0005829-cytosol	64.559	42.065	1.53474	0.617997			311.4	42.065	7.40282	2.88808	**		311.4	64.559	4.82349	2.27008	**		311.4	134.074	2.32259	1.21574	*
HCFC1R1	host cell factor C1 regulator 1 (XPO1 dependant) isoform 2 [Source:RefSeq_peptide;Acc:NP_001002017]	-	-	-	6.67402	3.87535	1.72217	0.784229			31.9844	3.87535	8.25328	3.04497	***		31.9844	6.67402	4.79237	2.26074	**		31.9844	46.712	0.684713	-0.546428
-	Heterogeneous nuclear ribonucleoprotein A1 (Helix-destabilizing protein) (Single-strand RNA-binding protein) (hnRNP core protein A1). [Source:Uniprot/SWISSPROT;Acc:P09651]	-	GO:0000166-nucleotide binding;GO:0003676-nucleic acid binding	-	134.44	11.1775	12.0277	3.58829	***		642.396	11.1775	57.4722	5.84479	***		642.396	134.44	4.7783	2.2565	**		642.396	5365.38	0.11973	-3.06214		***
LY6G6D	G6f protein [Source:RefSeq_peptide;Acc:NP_001003693]	-	-	-	56.4684	66.2105	0.852862	-0.229616			269.119	66.2105	4.0646	2.02311	**		269.119	56.4684	4.76584	2.25273	**		269.119	485.796	0.553976	-0.852104
RPL35A	60S ribosomal protein L35a. [Source:Uniprot/SWISSPROT;Acc:P18077]	GO:0006412-translation	GO:0000049-tRNA binding;GO:0003735-structural constituent of ribosome;GO:0005515-protein binding	GO:0005622-intracellular;GO:0005840-ribosome;GO:0005842-cytosolic large ribosomal subunit (sensu Eukaryota)	34.0011	2.38626	14.2487	3.83276	***		161.713	2.38626	67.7684	6.08254	***		161.713	34.0011	4.75611	2.24978	**		161.713	5915.74	0.0273361	-5.19305		***
RL41_HUMAN	60S ribosomal protein L41 (HG12). [Source:Uniprot/SWISSPROT;Acc:P62945]	GO:0006412-translation	GO:0003723-RNA binding;GO:0003735-structural constituent of ribosome	GO:0005840-ribosome;GO:0005842-cytosolic large ribosomal subunit (sensu Eukaryota)	3269.13	774.525	4.22082	2.07752	**		15468.4	774.525	19.9715	4.31987	***		15468.4	3269.13	4.73168	2.24235	**		15468.4	15976.9	0.968177	-0.0466577
-	Heterogeneous nuclear ribonucleoprotein A1 (Helix-destabilizing protein) (Single-strand RNA-binding protein) (hnRNP core protein A1). [Source:Uniprot/SWISSPROT;Acc:P09651]	-	-	-	9.3433	7.53918	1.2393	0.309526			43.7876	7.53918	5.808	2.53804	**		43.7876	9.3433	4.68652	2.22852	**		43.7876	620.601	0.0705566	-3.82507		***
RL41_HUMAN	-	GO:0006412-translation	GO:0003723-RNA binding;GO:0003735-structural constituent of ribosome	GO:0005840-ribosome;GO:0005842-cytosolic large ribosomal subunit (sensu Eukaryota)	87.5282	25.8853	3.38139	1.75762	*		408.18	25.8853	15.7688	3.979	***		408.18	87.5282	4.66341	2.22139	**		408.18	4715.89	0.0865542	-3.53025		***
-	-	GO:0006955-immune response	GO:0008538-proteasome activator activity	GO:0000502-proteasome complex (sensu Eukaryota);GO:0005829-cytosol;GO:0008537-proteasome activator complex	57.4106	28.7022	2.00022	1.00016	*		266.818	28.7022	9.29611	3.21663	***		266.818	57.4106	4.64754	2.21647	**		266.818	1134.51	0.235184	-2.08814		**
RL30_HUMAN	60S ribosomal protein L30. [Source:Uniprot/SWISSPROT;Acc:P62888]	GO:0006412-translation	GO:0003723-RNA binding;GO:0003735-structural constituent of ribosome	GO:0005622-intracellular;GO:0005840-ribosome;GO:0005842-cytosolic large ribosomal subunit (sensu Eukaryota)	73.7559	3.03974	24.2639	4.60074	***		342.695	3.03974	112.738	6.81683	***		342.695	73.7559	4.64634	2.21609	**		342.695	15819.5	0.0216629	-5.52863		***
DYL1_HUMAN	Dynein light chain 1, cytoplasmic (Dynein light chain LC8-type 1) (8 kDa dynein light chain) (DLC8) (Protein inhibitor of neuronal nitric oxide synthase) (PIN). [Source:Uniprot/SWISSPROT;Acc:P63167]	GO:0007017-microtubule-based process;GO:0007292-female gamete generation;GO:0009653-anatomical structure morphogenesis;GO:0030036-actin cytoskeleton organization and biogenesis	GO:0003777-microtubule motor activity;GO:0005515-protein binding	GO:0005737-cytoplasm;GO:0005868-cytoplasmic dynein complex;GO:0005874-microtubule	85.2768	10.1934	8.36588	3.06452	***		395.647	10.1934	38.814	5.2785	***		395.647	85.2768	4.63956	2.21399	**		395.647	1316.56	0.300516	-1.73449		*
UGCGL1	UDP-glucose:glycoprotein glucosyltransferase 1 precursor (EC 2.4.1.-) (UDP-glucose ceramide glucosyltransferase-like 1) (UDP-- Glc:glycoprotein glucosyltransferase) (HUGT1). [Source:Uniprot/SWISSPROT;Acc:Q9NYU2]	GO:0006486-protein amino acid glycosylation;GO:0051084-posttranslational protein folding	GO:0003980-UDP-glucose:glycoprotein glucosyltransferase activity;GO:0016757-transferase activity, transferring glycosyl groups;GO:0051082-unfolded protein binding	GO:0005783-endoplasmic reticulum;GO:0005793-ER-Golgi intermediate compartment	6.61862	5.56498	1.18933	0.250155			30.4542	5.56498	5.47247	2.45219	**		30.4542	6.61862	4.60129	2.20204	**		30.4542	32.2088	0.945525	-0.0808128
IFITM2	interferon induced transmembrane protein 2 (1-8D) (IFITM2), mRNA [Source:RefSeq_dna;Acc:NM_006435]	GO:0006955-immune response;GO:0008150-biological_process;GO:0009607-response to biotic stimulus	GO:0003674-molecular_function;GO:0005515-protein binding	GO:0005575-cellular_component;GO:0016020-membrane;GO:0016021-integral to membrane	619.669	458.912	1.3503	0.433279			2829.09	458.912	6.16477	2.62405	**		2829.09	619.669	4.56549	2.19077	**		2829.09	2820.23	1.00314	0.00452323
-	-	-	-	-	101.181	8.31185	12.1731	3.60562	***		460.576	8.31185	55.4119	5.79212	***		460.576	101.181	4.552	2.1865	**		460.576	6044.21	0.0762011	-3.71404		***
RL38_HUMAN	60S ribosomal protein L38. [Source:Uniprot/SWISSPROT;Acc:P63173]	GO:0006412-translation	GO:0003723-RNA binding;GO:0003735-structural constituent of ribosome;GO:0005515-protein binding	GO:0005622-intracellular;GO:0005840-ribosome;GO:0005842-cytosolic large ribosomal subunit (sensu Eukaryota)	34.7543	4.65795	7.46129	2.89943	**		158.045	4.65795	33.9303	5.0845	***		158.045	34.7543	4.54751	2.18508	**		158.045	3200.07	0.049388	-4.33969		***
PRKY	Serine/threonine-protein kinase PRKY (EC 2.7.11.1). [Source:Uniprot/SWISSPROT;Acc:O43930]	GO:0006468-protein amino acid phosphorylation	GO:0000166-nucleotide binding;GO:0004674-protein serine/threonine kinase activity;GO:0004713-protein-tyrosine kinase activity;GO:0005524-ATP binding;GO:0016740-transferase activity	-	4.67075	4.41632	1.05761	0.0808087			21.2357	4.41632	4.80845	2.26557	**		21.2357	4.67075	4.54652	2.18476	**		21.2357	48.2642	0.439988	-1.18446		*
IP6K2_HUMAN	Inositol hexakisphosphate kinase 2 (EC 2.7.4.21) (InsP6 kinase 2) (Inositol hexakisphosphate kinase 2) (P(i)-uptake stimulator) (PiUS). [Source:Uniprot/SWISSPROT;Acc:Q9UHH9]	GO:0030308-negative regulation of cell growth;GO:0043065-positive regulation of apoptosis	GO:0008440-inositol trisphosphate 3-kinase activity;GO:0008976-polyphosphate kinase activity;GO:0016740-transferase activity;GO:0050517-inositol hexakisphosphate kinase activity	GO:0005634-nucleus	9.43389	8.09633	1.16521	0.220585			42.8759	8.09633	5.29572	2.40483	**		42.8759	9.43389	4.54488	2.18424	**		42.8759	43.9436	0.975702	-0.0354879
XP_371330.2	-	GO:0006412-translation;GO:0006464-protein modification	GO:0003735-structural constituent of ribosome	GO:0005622-intracellular;GO:0005840-ribosome	6.99321	3.42573	2.04138	1.02954	*		31.6896	3.42573	9.25046	3.20953	***		31.6896	6.99321	4.53148	2.17998	**		31.6896	2418.53	0.0131028	-6.25398		***
-	similar to 60S ribosomal protein L12 (LOC344471), mRNA [Source:RefSeq_dna;Acc:XR_017063]	-	-	-	100.127	6.58791	15.1985	3.92586	***		452.529	6.58791	68.6909	6.10205	***		452.529	100.127	4.51957	2.17619	**		452.529	5876.52	0.0770064	-3.69888		***
FHL2	Four and a half LIM domains protein 2 (FHL-2) (Skeletal muscle LIM- protein 3) (SLIM 3) (LIM domain protein DRAL). [Source:Uniprot/SWISSPROT;Acc:Q14192]	GO:0006357-regulation of transcription from RNA polymerase II promoter;GO:0030521-androgen receptor signaling pathway;GO:0045893-positive regulation of transcription, DNA-dependent	GO:0003713-transcription coactivator activity;GO:0005515-protein binding;GO:0008270-zinc ion binding;GO:0046872-metal ion binding;GO:0050681-androgen receptor binding	GO:0005634-nucleus	224.081	94.8574	2.3623	1.24019	*		1011.37	94.8574	10.662	3.4144	***		1011.37	224.081	4.51339	2.17421	**		1011.37	2889.94	0.349961	-1.51473		*
NP_689563.1	-	-	-	-	51.4942	9.60832	5.35933	2.42205	**		231.769	9.60832	24.1218	4.59226	***		231.769	51.4942	4.50089	2.17021	**		231.769	1040.63	0.222721	-2.16669		**
STK24	Serine/threonine-protein kinase 24 (EC 2.7.11.1) (STE20-like kinase MST3) (MST-3) (Mammalian STE20-like protein kinase 3). [Source:Uniprot/SWISSPROT;Acc:Q9Y6E0]	GO:0006468-protein amino acid phosphorylation;GO:0007165-signal transduction	GO:0000166-nucleotide binding;GO:0004674-protein serine/threonine kinase activity;GO:0004713-protein-tyrosine kinase activity;GO:0005524-ATP binding;GO:0016301-kinase activity;GO:0016740-transferase activity	-	171.515	86.6907	1.97847	0.984382			771.747	86.6907	8.90231	3.15418	***		771.747	171.515	4.4996	2.1698	**		771.747	867.322	0.889805	-0.168439
XP_496353.1	Ribosomal protein L21 variant (Fragment). [Source:Uniprot/SPTREMBL;Acc:Q59GK9]	GO:0006412-translation	GO:0003735-structural constituent of ribosome	GO:0005622-intracellular;GO:0005840-ribosome	18.9399	2.58395	7.32984	2.87378	**		85.0561	2.58395	32.9171	5.04077	***		85.0561	18.9399	4.49084	2.16698	**		85.0561	2611.61	0.0325684	-4.94038		***
XP_497645.1	-	-	-	-	352.789	82.317	4.28574	2.09954	**		1581.38	82.317	19.2108	4.26385	***		1581.38	352.789	4.4825	2.1643	**		1581.38	5785.46	0.273336	-1.87125		*
NP_612445.1	Uncharacterized protein C8orf40. [Source:Uniprot/SWISSPROT;Acc:Q96E16]	-	-	GO:0016020-membrane;GO:0016021-integral to membrane	35.0018	5.47246	6.39599	2.67717	**		156.309	5.47246	28.5629	4.83607	***		156.309	35.0018	4.46575	2.1589	**		156.309	759.548	0.205792	-2.28074		**
NFKBIA	NF-kappa-B inhibitor alpha (Major histocompatibility complex enhancer- binding protein MAD3) (I-kappa-B-alpha) (IkappaBalpha) (IKB-alpha). [Source:Uniprot/SWISSPROT;Acc:P25963]	GO:0000060-protein import into nucleus, translocation;GO:0006915-apoptosis;GO:0007253-cytoplasmic sequestering of NF-kappaB;GO:0042127-regulation of cell proliferation;GO:0042345-regulation of NF-kappaB import into nucleus;GO:0043392-negative regulation of DNA binding;GO:0045638-negative regulation of myeloid cell differentiation;GO:0045746-negative regulation of Notch signaling pathway	GO:0008139-nuclear localization sequence binding;GO:0031625-ubiquitin protein ligase binding;GO:0051059-NF-kappaB binding	GO:0005634-nucleus;GO:0005737-cytoplasm;GO:0005829-cytosol	63.2046	28.4523	2.22143	1.15149	*		282.2	28.4523	9.91838	3.3101	***		282.2	63.2046	4.46487	2.15862	**		282.2	1541.12	0.183113	-2.44919		**
-	-	-	-	-	119.464	6.51589	18.3343	4.19648	***		531.692	6.51589	81.5993	6.35049	***		531.692	119.464	4.45063	2.15401	**		531.692	9134.2	0.0582089	-4.10262		***
SNF72_HUMAN	Charged multivesicular body protein 5 (Chromatin-modifying protein 5) (Vacuolar protein sorting 60) (Vps60) (hVps60) (SNF7 domain-containing protein 2). [Source:Uniprot/SWISSPROT;Acc:Q9NZZ3]	GO:0001919-regulation of receptor recycling;GO:0007040-lysosome organization and biogenesis;GO:0008333-endosome to lysosome transport;GO:0015031-protein transport	GO:0005515-protein binding	GO:0005634-nucleus	27.0625	5.75736	4.70051	2.23282	**		120.017	5.75736	20.8459	4.38169	***		120.017	27.0625	4.43482	2.14888	**		120.017	964.401	0.124448	-3.00639		***
ISG20_HUMAN	Interferon-stimulated gene 20 kDa protein (EC 3.1.13.1) (Promyelocytic leukemia nuclear body-associated protein ISG20) (Estrogen-regulated transcript 45 protein). [Source:Uniprot/SWISSPROT;Acc:Q96AZ6]	GO:0000738-DNA catabolic process, exonucleolytic;GO:0006401-RNA catabolic process;GO:0008283-cell proliferation;GO:0009615-response to virus	GO:0000175-3'-5'-exoribonuclease activity;GO:0003723-RNA binding;GO:0004527-exonuclease activity;GO:0008310-single-stranded DNA specific 3'-5' exodeoxyribonuclease activity;GO:0008859-exoribonuclease II activity;GO:0016787-hydrolase activity;GO:0030145-manganese ion binding;GO:0046872-metal ion binding	GO:0005622-intracellular;GO:0005634-nucleus;GO:0005654-nucleoplasm;GO:0016605-PML body	62.0392	82.1038	0.755619	-0.40427			274.954	82.1038	3.34886	1.74367	*		274.954	62.0392	4.43194	2.14794	**		274.954	235.278	1.16864	0.224825
XP_370611.1	-	GO:0006412-translation	GO:0003735-structural constituent of ribosome	GO:0005622-intracellular;GO:0005840-ribosome	157.296	56.935	2.76273	1.4661	*		694.562	56.935	12.1992	3.60872	***		694.562	157.296	4.41563	2.14262	**		694.562	5706.69	0.12171	-3.03848		***
RIOK1	Serine/threonine-protein kinase RIO1 (EC 2.7.11.1) (RIO kinase 1). [Source:Uniprot/SWISSPROT;Acc:Q9BRS2]	-	GO:0000166-nucleotide binding;GO:0004674-protein serine/threonine kinase activity;GO:0005524-ATP binding;GO:0016301-kinase activity;GO:0016740-transferase activity	-	7.93304	6.3372	1.25182	0.324027			35.0145	6.3372	5.52524	2.46604	**		35.0145	7.93304	4.41376	2.14201	**		35.0145	184.317	0.189969	-2.39617		**
-	-	-	-	-	31.5378	2.74102	11.5059	3.5243	***		138.818	2.74102	50.6444	5.66233	***		138.818	31.5378	4.40162	2.13804	**		138.818	826.483	0.167962	-2.57379		**
HLA-F	major histocompatibility complex, class I, F (HLA-F), mRNA [Source:RefSeq_dna;Acc:NM_018950]	GO:0002474-antigen processing and presentation of peptide antigen via MHC class I;GO:0006955-immune response;GO:0019882-antigen processing and presentation	GO:0032393-MHC class I receptor activity	GO:0016020-membrane;GO:0016021-integral to membrane;GO:0042612-MHC class I protein complex	57.4825	19.4056	2.96216	1.56665	*		252.754	19.4056	13.0248	3.70319	***		252.754	57.4825	4.39707	2.13654	**		252.754	1536.37	0.164514	-2.60372		**
NP_068597.2	coiled-coil domain containing 90B [Source:RefSeq_peptide;Acc:NP_068597]	-	-	GO:0005739-mitochondrion	10.0435	2.42792	4.13669	2.04848	**		44.0562	2.42792	18.1457	4.18155	***		44.0562	10.0435	4.38652	2.13308	**		44.0562	471.126	0.0935127	-3.41869		***
RS8_HUMAN	40S ribosomal protein S8. [Source:Uniprot/SWISSPROT;Acc:P62241]	GO:0006412-translation	GO:0003723-RNA binding;GO:0003735-structural constituent of ribosome;GO:0005515-protein binding	GO:0005622-intracellular;GO:0005843-cytosolic small ribosomal subunit (sensu Eukaryota);GO:0030529-ribonucleoprotein complex	9.69722	5.69403	1.70305	0.768121			42.4975	5.69403	7.46351	2.89985	**		42.4975	9.69722	4.38244	2.13173	**		42.4975	2427.38	0.0175075	-5.83588		***
Q6PEB8_HUMAN	-	-	-	-	22.8777	8.20914	2.78686	1.47864	*		99.5203	8.20914	12.1231	3.59969	***		99.5203	22.8777	4.35009	2.12105	**		99.5203	787.247	0.126416	-2.98375		**
XP_372527.2	-	-	-	-	12.0376	4.60481	2.61414	1.38634	*		52.2588	4.60481	11.3488	3.50446	***		52.2588	12.0376	4.34129	2.11812	**		52.2588	3051.61	0.017125	-5.86775		***
NDUFA8	NADH dehydrogenase [ubiquinone] 1 alpha subcomplex subunit 8 (EC 1.6.5.3) (EC 1.6.99.3) (NADH-ubiquinone oxidoreductase 19 kDa subunit) (Complex I-19kD) (CI-19kD) (Complex I-PGIV) (CI-PGIV). [Source:Uniprot/SWISSPROT;Acc:P51970]	GO:0006120-mitochondrial electron transport, NADH to ubiquinone	GO:0003954-NADH dehydrogenase activity;GO:0008137-NADH dehydrogenase (ubiquinone) activity;GO:0016491-oxidoreductase activity	GO:0005739-mitochondrion;GO:0005743-mitochondrial inner membrane;GO:0005747-mitochondrial respiratory chain complex I	55.4556	19.613	2.82749	1.49952	*		240.433	19.613	12.2589	3.61575	***		240.433	55.4556	4.3356	2.11623	**		240.433	915.037	0.262758	-1.92819		*
PDIA6_HUMAN	Protein disulfide-isomerase A6 precursor (EC 5.3.4.1) (Protein disulfide isomerase P5) (Thioredoxin domain-containing protein 7). [Source:Uniprot/SWISSPROT;Acc:Q15084]	GO:0006457-protein folding;GO:0045454-cell redox homeostasis	GO:0003756-protein disulfide isomerase activity;GO:0005515-protein binding;GO:0016853-isomerase activity	GO:0005783-endoplasmic reticulum;GO:0005793-ER-Golgi intermediate compartment	208.337	72.5375	2.87213	1.52212	*		901.658	72.5375	12.4302	3.63578	***		901.658	208.337	4.32788	2.11366	**		901.658	1803.3	0.500004	-0.999989
RPLP1	60S acidic ribosomal protein P1. [Source:Uniprot/SWISSPROT;Acc:P05386]	GO:0006414-translational elongation	GO:0003723-RNA binding;GO:0003735-structural constituent of ribosome;GO:0005515-protein binding	GO:0005622-intracellular;GO:0005840-ribosome;GO:0005842-cytosolic large ribosomal subunit (sensu Eukaryota)	6790.83	4112.83	1.65114	0.723458			29356.1	4112.83	7.13768	2.83546	**		29356.1	6790.83	4.3229	2.112	**		29356.1	20444.6	1.43588	0.521937
SUGT1	Suppressor of G2 allele of SKP1 homolog (Sgt1) (Putative 40-6-3 protein). [Source:Uniprot/SWISSPROT;Acc:Q9Y2Z0]	GO:0000074-regulation of progression through cell cycle;GO:0006512-ubiquitin cycle;GO:0007067-mitosis	GO:0005488-binding	GO:0000151-ubiquitin ligase complex;GO:0000776-kinetochore	17.9526	5.62929	3.18914	1.67317	*		77.596	5.62929	13.7843	3.78496	***		77.596	17.9526	4.32226	2.11179	**		77.596	573.131	0.13539	-2.88481		**
-	40S ribosomal protein SA (p40) (34/67 kDa laminin receptor) (Colon carcinoma laminin-binding protein) (NEM/1CHD4) (Multidrug resistance- associated protein MGr1-Ag). [Source:Uniprot/SWISSPROT;Acc:P08865]	-	-	-	2321.12	944.97	2.45629	1.29648	*		10021.7	944.97	10.6053	3.40671	***		10021.7	2321.12	4.3176	2.11023	**		10021.7	25688.8	0.390119	-1.35801		*
IMPA1	Inositol monophosphatase (EC 3.1.3.25) (IMPase) (IMP) (Inositol-1(or 4)-monophosphatase) (Lithium-sensitive myo-inositol monophosphatase A1). [Source:Uniprot/SWISSPROT;Acc:P29218]	GO:0005975-carbohydrate metabolic process;GO:0006661-phosphatidylinositol biosynthetic process;GO:0006796-phosphate metabolic process;GO:0007165-signal transduction	GO:0000287-magnesium ion binding;GO:0008934-inositol-1(or 4)-monophosphatase activity;GO:0016787-hydrolase activity;GO:0031403-lithium ion binding;GO:0042578-phosphoric ester hydrolase activity	-	7.87162	2.17592	3.6176	1.85503	*		33.8035	2.17592	15.5353	3.95747	***		33.8035	7.87162	4.29435	2.10244	**		33.8035	265.534	0.127304	-2.97365		**
KIAA1600	KIAA1600 (KIAA1600), mRNA [Source:RefSeq_dna;Acc:NM_020940]	-	-	-	34.6963	7.33391	4.73095	2.24213	**		148.827	7.33391	20.293	4.34291	***		148.827	34.6963	4.28942	2.10078	**		148.827	500.39	0.297422	-1.74941		*
-	-	-	-	-	9.89489	3.48411	2.84	1.50589	*		42.2918	3.48411	12.1385	3.60151	***		42.2918	9.89489	4.2741	2.09562	**		42.2918	784.307	0.0539224	-4.21297		***
NP_078865.1	leucine zipper domain protein [Source:RefSeq_peptide;Acc:NP_078865]	-	-	-	73.6237	27.4128	2.68574	1.42532	*		313.222	27.4128	11.4261	3.51426	***		313.222	73.6237	4.25436	2.08894	**		313.222	81.1487	3.85985	1.94854	*
ZNF659	Zinc finger protein 659. [Source:Uniprot/SWISSPROT;Acc:Q9H6B1]	-	GO:0003676-nucleic acid binding;GO:0008270-zinc ion binding;GO:0046872-metal ion binding	GO:0005622-intracellular;GO:0005634-nucleus	5.43537	2.93469	1.85211	0.889169			23.1227	2.93469	7.87908	2.97803	**		23.1227	5.43537	4.25411	2.08886	**		23.1227	60.1387	0.384489	-1.37898		*
MRPL45	39S ribosomal protein L45, mitochondrial precursor (L45mt) (MRP-L45). [Source:Uniprot/SWISSPROT;Acc:Q9BRJ2]	GO:0006412-translation;GO:0006886-intracellular protein transport	GO:0003735-structural constituent of ribosome;GO:0015450-protein translocase activity	GO:0005739-mitochondrion;GO:0005744-mitochondrial inner membrane presequence translocase complex;GO:0030529-ribonucleoprotein complex	14.2106	3.7284	3.81144	1.93034	*		60.4458	3.7284	16.2123	4.01901	***		60.4458	14.2106	4.25357	2.08868	**		60.4458	285.799	0.211498	-2.24128		**
LAMA5	Laminin subunit alpha-5 precursor. [Source:Uniprot/SWISSPROT;Acc:O15230]	GO:0007155-cell adhesion;GO:0030155-regulation of cell adhesion;GO:0030334-regulation of cell migration;GO:0045995-regulation of embryonic development	GO:0005102-receptor binding;GO:0005198-structural molecule activity;GO:0005515-protein binding	GO:0005578-proteinaceous extracellular matrix;GO:0005605-basal lamina;GO:0005606-laminin-1 complex;GO:0016020-membrane;GO:0016021-integral to membrane	114.514	40.2169	2.8474	1.50964	*		487.063	40.2169	12.1109	3.59823	***		487.063	114.514	4.25332	2.08859	**		487.063	169.397	2.87528	1.5237	*
ANMX_HUMAN	Protein arginine N-methyltransferase 7 (EC 2.1.1.-). [Source:Uniprot/SWISSPROT;Acc:Q9NVM4]	GO:0016571-histone methylation;GO:0018216-peptidyl-arginine methylation;GO:0043393-regulation of protein binding	GO:0008469-histone-arginine N-methyltransferase activity;GO:0008757-S-adenosylmethionine-dependent methyltransferase activity;GO:0016277-[myelin basic protein]-arginine N-methyltransferase activity;GO:0016740-transferase activity;GO:0035241-protein-arginine omega-N monomethyltransferase activity;GO:0035243-protein-arginine omega-N symmetric methyltransferase activity;GO:0042393-histone binding	GO:0005634-nucleus;GO:0005737-cytoplasm	20.0797	7.3328	2.73834	1.4533	*		85.2671	7.3328	11.6282	3.53955	***		85.2671	20.0797	4.24643	2.08625	**		85.2671	29.5564	2.8849	1.52852	*
RBM9	RNA-binding protein 9 (RNA-binding motif protein 9) (Hexaribonucleotide-binding protein 2) (Repressor of tamoxifen transcriptional activity). [Source:Uniprot/SWISSPROT;Acc:O43251]	GO:0016070-RNA metabolic process;GO:0016481-negative regulation of transcription;GO:0030520-estrogen receptor signaling pathway;GO:0042127-regulation of cell proliferation	GO:0000166-nucleotide binding;GO:0003714-transcription corepressor activity;GO:0003723-RNA binding;GO:0008134-transcription factor binding	GO:0005634-nucleus	5.42727	3.39153	1.60024	0.678289			23.0149	3.39153	6.78598	2.76256	**		23.0149	5.42727	4.2406	2.08427	**		23.0149	36.8434	0.624667	-0.67884
RS23_HUMAN	-	GO:0006412-translation	GO:0003723-RNA binding;GO:0003735-structural constituent of ribosome;GO:0045182-translation regulator activity	GO:0005622-intracellular;GO:0005843-cytosolic small ribosomal subunit (sensu Eukaryota)	10.1008	8.57235	1.1783	0.23671			42.7474	8.57235	4.98666	2.31807	**		42.7474	10.1008	4.23207	2.08136	**		42.7474	65.9621	0.648059	-0.625802
-	-	GO:0006412-translation	GO:0003723-RNA binding;GO:0003735-structural constituent of ribosome	GO:0005622-intracellular;GO:0005840-ribosome;GO:0005842-cytosolic large ribosomal subunit (sensu Eukaryota)	116.675	47.6474	2.44872	1.29203	*		493.645	47.6474	10.3604	3.37301	***		493.645	116.675	4.23094	2.08098	**		493.645	3216.16	0.153489	-2.70379		**
XP_059037.4	Wilms tumor 1 interacting protein [Source:RefSeq_peptide;Acc:NP_001073905]	-	GO:0008270-zinc ion binding	-	7.38107	8.40158	0.878533	-0.186831			31.1843	8.40158	3.71172	1.89209	*		31.1843	7.38107	4.22491	2.07892	**		31.1843	7.34453	4.24593	2.08608	**
ATP5H	ATP synthase D chain, mitochondrial (EC 3.6.3.14). [Source:Uniprot/SWISSPROT;Acc:O75947]	GO:0006811-ion transport;GO:0015986-ATP synthesis coupled proton transport;GO:0015992-proton transport	GO:0046933-hydrogen ion transporting ATP synthase activity, rotational mechanism;GO:0046961-hydrogen ion transporting ATPase activity, rotational mechanism	GO:0005739-mitochondrion;GO:0016469-proton-transporting two-sector ATPase complex;GO:0045263-proton-transporting ATP synthase complex, coupling factor F(o)	58.621	4.95043	11.8416	3.56579	***		245.663	4.95043	49.6246	5.63298	***		245.663	58.621	4.1907	2.06719	**		245.663	3343.06	0.0734845	-3.76642		***
-	Ribosomal protein L21 variant (Fragment). [Source:Uniprot/SPTREMBL;Acc:Q59GK9]	GO:0006412-translation	GO:0003723-RNA binding;GO:0003735-structural constituent of ribosome	GO:0005622-intracellular;GO:0005840-ribosome;GO:0005842-cytosolic large ribosomal subunit (sensu Eukaryota)	133.058	61.5309	2.16246	1.11267	*		554.484	61.5309	9.01148	3.17176	***		554.484	133.058	4.16724	2.05909	**		554.484	7007.94	0.0791223	-3.65977		***
TIMP1	Metalloproteinase inhibitor 1 precursor (TIMP-1) (Erythroid- potentiating activity) (EPA) (Tissue inhibitor of metalloproteinases) (Fibroblast collagenase inhibitor) (Collagenase inhibitor). [Source:Uniprot/SWISSPROT;Acc:P01033]	GO:0007275-multicellular organismal development;GO:0008284-positive regulation of cell proliferation;GO:0043249-erythrocyte maturation;GO:0051045-negative regulation of membrane protein ectodomain proteolysis	GO:0004857-enzyme inhibitor activity;GO:0005515-protein binding;GO:0008191-metalloendopeptidase inhibitor activity	GO:0005576-extracellular region;GO:0005578-proteinaceous extracellular matrix;GO:0005604-basement membrane	17.178	2.85989	6.00654	2.58653	**		71.5043	2.85989	25.0025	4.644	***		71.5043	17.178	4.16254	2.05747	**		71.5043	952.312	0.075085	-3.73533		***
TFDP1	Transcription factor Dp-1 (E2F dimerization partner 1) (DRTF1- polypeptide 1) (DRTF1). [Source:Uniprot/SWISSPROT;Acc:Q14186]	GO:0000074-regulation of progression through cell cycle;GO:0006350-transcription;GO:0006355-regulation of transcription, DNA-dependent;GO:0006357-regulation of transcription from RNA polymerase II promoter;GO:0007049-cell cycle;GO:0008283-cell proliferation	GO:0003700-transcription factor activity;GO:0003713-transcription coactivator activity	GO:0005634-nucleus;GO:0005667-transcription factor complex	8.05335	3.5538	2.26613	1.18023	*		33.3585	3.5538	9.38671	3.23062	***		33.3585	8.05335	4.14219	2.05039	**		33.3585	165.612	0.201425	-2.31169		**
ADCY3	Adenylate cyclase type 3 (EC 4.6.1.1) (Adenylate cyclase type III) (ATP pyrophosphate-lyase 3) (Adenylyl cyclase 3) (AC-III) (AC3) (Adenylate cyclase, olfactive type). [Source:Uniprot/SWISSPROT;Acc:O60266]	GO:0006171-cAMP biosynthetic process;GO:0007242-intracellular signaling cascade;GO:0007608-sensory perception of smell;GO:0050896-response to stimulus	GO:0000287-magnesium ion binding;GO:0004016-adenylate cyclase activity;GO:0005516-calmodulin binding	GO:0005886-plasma membrane;GO:0005887-integral to plasma membrane	6.49338	7.55047	0.859997	-0.217597			26.7897	7.55047	3.54808	1.82704	*		26.7897	6.49338	4.1257	2.04464	**		26.7897	89.3348	0.29988	-1.73754		*
-	40S ribosomal protein S8. [Source:Uniprot/SWISSPROT;Acc:P62241]	-	-	GO:0005622-intracellular	9.04415	8.04454	1.12426	0.168975			37.278	8.04454	4.63395	2.21224	**		37.278	9.04415	4.12178	2.04327	**		37.278	1126.12	0.033103	-4.91689		***
RPL35	60S ribosomal protein L35. [Source:Uniprot/SWISSPROT;Acc:P42766]	GO:0006412-translation	GO:0003729-mRNA binding;GO:0003735-structural constituent of ribosome;GO:0005515-protein binding	GO:0005622-intracellular;GO:0005730-nucleolus;GO:0005840-ribosome;GO:0005842-cytosolic large ribosomal subunit (sensu Eukaryota)	8.41741	7.74181	1.08727	0.120707			34.6072	7.74181	4.47018	2.16033	**		34.6072	8.41741	4.11139	2.03962	**		34.6072	1584.6	0.0218397	-5.5169		***
HIST2H2AC	Histone H2A type 2-C (H2A-GL101) (H2A/r). [Source:Uniprot/SWISSPROT;Acc:Q16777]	GO:0006334-nucleosome assembly;GO:0007001-chromosome organization and biogenesis (sensu Eukaryota)	GO:0003677-DNA binding	GO:0000786-nucleosome;GO:0005634-nucleus;GO:0005694-chromosome	7.4029	3.96053	1.86917	0.902398			30.3789	3.96053	7.67043	2.93931	**		30.3789	7.4029	4.10365	2.03691	**		30.3789	13.024	2.33253	1.2219	*
C19orf33	Immortalization-up-regulated protein (Hepatocyte growth factor activator inhibitor type 2-related small protein) (HAI-2-related small protein) (H2RSP). [Source:Uniprot/SWISSPROT;Acc:Q9GZP8]	-	-	GO:0005634-nucleus;GO:0005730-nucleolus	286.24	37.6971	7.59315	2.9247	**		1174.54	37.6971	31.1574	4.9615	***		1174.54	286.24	4.10335	2.0368	**		1174.54	350.139	3.3545	1.7461	*
COBL	Protein cordon-bleu. [Source:Uniprot/SWISSPROT;Acc:O75128]	GO:0001843-neural tube closure	-	-	10.536	3.86165	2.72836	1.44803	*		43.2002	3.86165	11.187	3.48375	***		43.2002	10.536	4.10026	2.03571	**		43.2002	223.685	0.19313	-2.37236		**
COL5A1	Collagen alpha-1(V) chain precursor. [Source:Uniprot/SWISSPROT;Acc:P20908]	GO:0006817-phosphate transport;GO:0007155-cell adhesion	GO:0005201-extracellular matrix structural constituent;GO:0008201-heparin binding	GO:0005581-collagen;GO:0005588-collagen type V;GO:0005737-cytoplasm	50.1841	20.7263	2.42127	1.27577	*		205.358	20.7263	9.90808	3.30861	***		205.358	50.1841	4.0921	2.03284	**		205.358	151.946	1.35152	0.43458
NPDC1	Neural proliferation differentiation and control protein 1 precursor (NPDC-1 protein). [Source:Uniprot/SWISSPROT;Acc:Q9NQX5]	-	-	GO:0016020-membrane;GO:0016021-integral to membrane	83.6632	80.188	1.04334	0.0612071			340.819	80.188	4.25024	2.08755	**		340.819	83.6632	4.0737	2.02634	**		340.819	128.754	2.64706	1.40439	*
POLR2E	DNA-directed RNA polymerase II 23 kDa polypeptide (EC 2.7.7.6) (RPB25) (RPB5) (RPABC1) (XAP4). [Source:Uniprot/SWISSPROT;Acc:P19388]	GO:0006350-transcription;GO:0006366-transcription from RNA polymerase II promoter	GO:0003677-DNA binding;GO:0003899-DNA-directed RNA polymerase activity;GO:0005515-protein binding;GO:0016740-transferase activity	GO:0005634-nucleus;GO:0005665-DNA-directed RNA polymerase II, core complex	180.31	118.113	1.5266	0.610318			734.193	118.113	6.21604	2.636	**		734.193	180.31	4.07183	2.02568	**		734.193	325.395	2.25631	1.17397	*
C20orf31	ER degradation-enhancing alpha-mannosidase-like 2 precursor. [Source:Uniprot/SWISSPROT;Acc:Q9BV94]	-	GO:0004571-mannosyl-oligosaccharide 1,2-alpha-mannosidase activity;GO:0005509-calcium ion binding	GO:0016020-membrane	12.7542	5.92702	2.15187	1.10559	*		51.8488	5.92702	8.74787	3.12893	***		51.8488	12.7542	4.06523	2.02334	**		51.8488	61.0395	0.84943	-0.235433
SKP1_HUMAN	S-phase kinase-associated protein 1A (Cyclin A/CDK2-associated protein p19) (p19A) (p19skp1) (RNA polymerase II elongation factor-like protein) (Organ of Corti protein 2) (OCP-II protein) (OCP-2) (Transcription elongation factor B) (SIII). [Source:Uniprot/SWISSPROT;Acc:P63208]	GO:0006512-ubiquitin cycle;GO:0008150-biological_process	GO:0003674-molecular_function;GO:0005515-protein binding	GO:0005575-cellular_component;GO:0019005-SCF ubiquitin ligase complex	26.0406	2.38101	10.9368	3.45111	***		105.489	2.38101	44.3044	5.46938	***		105.489	26.0406	4.05095	2.01826	**		105.489	1229.95	0.0857674	-3.54343		***
RS18_HUMAN	40S ribosomal protein S18 (Ke-3) (Ke3). [Source:Uniprot/SWISSPROT;Acc:P62269]	GO:0006412-translation	GO:0003735-structural constituent of ribosome;GO:0019843-rRNA binding	GO:0005622-intracellular;GO:0005840-ribosome	3769.4	1569.78	2.40123	1.26377	*		15193.3	1569.78	9.6786	3.2748	***		15193.3	3769.4	4.03069	2.01103	**		15193.3	29471.4	0.515526	-0.955882
XP_373354.2	-	-	-	-	27.3486	7.47327	3.65952	1.87165	*		109.862	7.47327	14.7007	3.87781	***		109.862	27.3486	4.0171	2.00616	**		109.862	3948.04	0.027827	-5.16737		***
AP2M1_HUMAN	AP-2 complex subunit mu-1 (Adaptin mu-1) (AP-2 mu-2 chain) (Clathrin coat assembly protein AP50) (Clathrin coat-associated protein AP50) (Plasma membrane adaptor AP-2 50 kDa protein) (HA2 50 kDa subunit) (Clathrin assembly protein complex 2 medium chain). [Source:Uniprot/SWISSPROT;Acc:Q96CW1]	GO:0006810-transport;GO:0006886-intracellular protein transport	GO:0005215-transporter activity;GO:0005515-protein binding;GO:0008289-lipid binding	GO:0005739-mitochondrion;GO:0005905-coated pit;GO:0030125-clathrin vesicle coat	374.953	303.551	1.23523	0.304774			1502.22	303.551	4.94882	2.30708	**		1502.22	374.953	4.00641	2.00231	**		1502.22	949.53	1.58206	0.661808
NP_057180.1	Zinc finger protein 706. [Source:Uniprot/SWISSPROT;Acc:Q9Y5V0]	-	GO:0003676-nucleic acid binding;GO:0008270-zinc ion binding;GO:0046872-metal ion binding	GO:0005622-intracellular	27.2647	4.65795	5.85337	2.54927	**		109.13	4.65795	23.4289	4.55021	***		109.13	27.2647	4.00263	2.00095	**		109.13	540.234	0.202006	-2.30753		**
-	-	-	-	-	14.7446	2.16969	6.7957	2.76462	**		58.8289	2.16969	27.1139	4.76096	***		58.8289	14.7446	3.98987	1.99634	*		58.8289	3852.24	0.0152714	-6.03303		***
Q9BYB2_HUMAN	DiGeorge syndrome critical region gene 5 (non-coding) (DGCR5) on chromosome 22 [Source:RefSeq_dna;Acc:NR_002733]	-	-	-	10.6161	10.4658	1.01435	0.0205594			42.1716	10.4658	4.02945	2.01058	**		42.1716	10.6161	3.97244	1.99002	*		42.1716	25.3635	1.66269	0.733517
RPA3	Replication protein A 14 kDa subunit (RP-A) (RF-A) (Replication factor-A protein 3) (p14). [Source:Uniprot/SWISSPROT;Acc:P35244]	GO:0006260-DNA replication;GO:0006281-DNA repair	GO:0003697-single-stranded DNA binding	GO:0005634-nucleus;GO:0005662-DNA replication factor A complex	11.9187	6.41225	1.85874	0.894323			47.257	6.41225	7.3698	2.88163	**		47.257	11.9187	3.96495	1.9873	*		47.257	565.859	0.0835137	-3.58184		***
NME2	Nucleoside diphosphate kinase B (EC 2.7.4.6) (NDK B) (NDP kinase B) (nm23-H2) (C-myc purine-binding transcription factor PUF). [Source:Uniprot/SWISSPROT;Acc:P22392]	GO:0006183-GTP biosynthetic process;GO:0006228-UTP biosynthetic process;GO:0006241-CTP biosynthetic process;GO:0006350-transcription;GO:0006355-regulation of transcription, DNA-dependent;GO:0007049-cell cycle;GO:0007155-cell adhesion;GO:0008285-negative regulation of cell proliferation;GO:0009117-nucleotide metabolic process;GO:0009142-nucleoside triphosphate biosynthetic process;GO:0045786-negat…	GO:0000166-nucleotide binding;GO:0000287-magnesium ion binding;GO:0003700-transcription factor activity;GO:0004550-nucleoside diphosphate kinase activity;GO:0005515-protein binding;GO:0005524-ATP binding;GO:0016301-kinase activity;GO:0016740-transferase activity	GO:0001726-ruffle;GO:0005634-nucleus;GO:0030027-lamellipodium	418.067	74.6279	5.60202	2.48595	**		1650.77	74.6279	22.12	4.46728	***		1650.77	418.067	3.94857	1.98133	*		1650.77	4842.15	0.340916	-1.55251		*
TK1	Thymidine kinase, cytosolic (EC 2.7.1.21). [Source:Uniprot/SWISSPROT;Acc:P04183]	GO:0006139-nucleobase, nucleoside, nucleotide and nucleic acid metabolic process;GO:0006260-DNA replication	GO:0000166-nucleotide binding;GO:0004797-thymidine kinase activity;GO:0005524-ATP binding;GO:0016301-kinase activity;GO:0016740-transferase activity	GO:0005737-cytoplasm	11.0044	6.40571	1.71791	0.780651			43.3251	6.40571	6.76351	2.75777	**		43.3251	11.0044	3.93706	1.97712	*		43.3251	54.3611	0.796988	-0.327371
XP_495867.1	-	-	-	-	7.88674	8.40146	0.938734	-0.0912117			30.9654	8.40146	3.68571	1.88194	*		30.9654	7.88674	3.92626	1.97316	*		30.9654	942.615	0.0328505	-4.92794		***
SEC14L1	SEC14-like protein 1. [Source:Uniprot/SWISSPROT;Acc:Q92503]	GO:0006810-transport	GO:0005215-transporter activity;GO:0005488-binding	GO:0005622-intracellular;GO:0005794-Golgi apparatus;GO:0016020-membrane	9.20804	6.40059	1.43862	0.52469			36.1332	6.40059	5.64529	2.49705	**		36.1332	9.20804	3.92409	1.97236	*		36.1332	105.435	0.342706	-1.54496		*
SYYM_HUMAN	Tyrosyl-tRNA synthetase, mitochondrial precursor (EC 6.1.1.1) (Tyrosine--tRNA ligase) (TyrRS). [Source:Uniprot/SWISSPROT;Acc:Q9Y2Z4]	GO:0006437-tyrosyl-tRNA aminoacylation	GO:0000166-nucleotide binding;GO:0004831-tyrosine-tRNA ligase activity;GO:0005515-protein binding;GO:0005524-ATP binding;GO:0016874-ligase activity	GO:0005739-mitochondrion	12.0224	4.53791	2.64933	1.40563	*		47.0804	4.53791	10.3749	3.37503	***		47.0804	12.0224	3.91604	1.9694	*		47.0804	162.549	0.289638	-1.78768		*
MAD2L1BP	MAD2L1-binding protein (Caught by MAD2 protein). [Source:Uniprot/SWISSPROT;Acc:Q15013]	GO:0007096-regulation of exit from mitosis	GO:0005515-protein binding	GO:0005634-nucleus;GO:0005737-cytoplasm	18.6553	7.54937	2.47111	1.30516	*		72.8424	7.54937	9.64881	3.27035	***		72.8424	18.6553	3.90465	1.96519	*		72.8424	208.519	0.349332	-1.51733		*
EXOSC8	Exosome complex exonuclease RRP43 (EC 3.1.13.-) (Ribosomal RNA- processing protein 43) (Exosome component 8) (p9) (Opa-interacting protein 2). [Source:Uniprot/SWISSPROT;Acc:Q96B26]	GO:0006364-rRNA processing;GO:0006396-RNA processing;GO:0008150-biological_process	GO:0000175-3'-5'-exoribonuclease activity;GO:0003674-molecular_function;GO:0003723-RNA binding;GO:0004527-exonuclease activity;GO:0016787-hydrolase activity;GO:0042802-identical protein binding	GO:0000178-exosome (RNase complex);GO:0005575-cellular_component;GO:0005634-nucleus	14.3555	5.03438	2.85149	1.51172	*		56.0363	5.03438	11.1307	3.47648	***		56.0363	14.3555	3.90347	1.96476	*		56.0363	341.11	0.164276	-2.6058		**
USP14	Ubiquitin carboxyl-terminal hydrolase 14 (EC 3.1.2.15) (Ubiquitin thioesterase 14) (Ubiquitin-specific-processing protease 14) (Deubiquitinating enzyme 14). [Source:Uniprot/SWISSPROT;Acc:P54578]	GO:0006464-protein modification;GO:0006511-ubiquitin-dependent protein catabolic process;GO:0006512-ubiquitin cycle;GO:0007268-synaptic transmission	GO:0004197-cysteine-type endopeptidase activity;GO:0004221-ubiquitin thiolesterase activity;GO:0008193-tRNA guanylyltransferase activity	GO:0005625-soluble fraction;GO:0019717-synaptosome	15.407	3.79191	4.06311	2.02258	**		60.0819	3.79191	15.8447	3.98593	***		60.0819	15.407	3.89966	1.96335	*		60.0819	204.041	0.29446	-1.76386		*
DDR1	Epithelial discoidin domain-containing receptor 1 precursor (EC 2.7.10.1) (Epithelial discoidin domain receptor 1) (Tyrosine kinase DDR) (Discoidin receptor tyrosine kinase) (Tyrosine-protein kinase CAK) (Cell adhesion kinase) (TRK E) (Protein-tyrosine ki [Source:Uniprot/SWISSPROT;Acc:Q08345]	GO:0006468-protein amino acid phosphorylation;GO:0007155-cell adhesion;GO:0007169-transmembrane receptor protein tyrosine kinase signaling pathway	GO:0000166-nucleotide binding;GO:0004713-protein-tyrosine kinase activity;GO:0004714-transmembrane receptor protein tyrosine kinase activity;GO:0004872-receptor activity;GO:0005524-ATP binding;GO:0016740-transferase activity	GO:0005634-nucleus;GO:0005887-integral to plasma membrane;GO:0016020-membrane;GO:0016021-integral to membrane	106.859	15.3315	6.9699	2.80114	**		415.905	15.3315	27.1276	4.76169	***		415.905	106.859	3.8921	1.96055	*		415.905	783.538	0.530804	-0.913749
RS24_HUMAN	40S ribosomal protein S24. [Source:Uniprot/SWISSPROT;Acc:P62847]	GO:0006412-translation	GO:0000166-nucleotide binding;GO:0003723-RNA binding;GO:0003735-structural constituent of ribosome	GO:0005622-intracellular;GO:0005843-cytosolic small ribosomal subunit (sensu Eukaryota)	11.5545	2.83051	4.08211	2.02931	**		44.9619	2.83051	15.8847	3.98957	***		44.9619	11.5545	3.8913	1.96025	*		44.9619	2610.05	0.0172265	-5.85923		***
-	-	-	-	-	62.7926	11.2307	5.59114	2.48314	**		243.902	11.2307	21.7174	4.44078	***		243.902	62.7926	3.88425	1.95764	*		243.902	2394.48	0.10186	-3.29534		***
RL40_HUMAN	Ubiquitin. [Source:Uniprot/SWISSPROT;Acc:P62988]	GO:0006412-translation;GO:0006464-protein modification	GO:0003735-structural constituent of ribosome	GO:0005622-intracellular;GO:0005840-ribosome	380.597	231.808	1.64187	0.715337			1475.39	231.808	6.36471	2.67009	**		1475.39	380.597	3.87651	1.95476	*		1475.39	3290.32	0.448402	-1.15713		*
-	-	-	-	-	274.951	61.3907	4.47871	2.16308	**		1065.46	61.3907	17.3554	4.11731	***		1065.46	274.951	3.87508	1.95423	*		1065.46	4406.29	0.241804	-2.04809		**
-	-	GO:0006412-translation	GO:0003723-RNA binding;GO:0003735-structural constituent of ribosome;GO:0008201-heparin binding	GO:0005622-intracellular;GO:0005840-ribosome;GO:0005842-cytosolic large ribosomal subunit (sensu Eukaryota)	31.1953	6.00312	5.19651	2.37754	**		120.624	6.00312	20.0936	4.32867	***		120.624	31.1953	3.86676	1.95112	*		120.624	1151.08	0.104793	-3.25439		***
-	-	-	-	-	433.788	92.1086	4.70953	2.23558	**		1668.97	92.1086	18.1196	4.17948	***		1668.97	433.788	3.84743	1.94389	*		1668.97	4091.83	0.407878	-1.29379		*
RPL12	60S ribosomal protein L12. [Source:Uniprot/SWISSPROT;Acc:P30050]	GO:0006412-translation	GO:0003723-RNA binding;GO:0003735-structural constituent of ribosome	GO:0005622-intracellular;GO:0005840-ribosome;GO:0005842-cytosolic large ribosomal subunit (sensu Eukaryota)	217.159	57.1758	3.79809	1.92528	*		834.079	57.1758	14.588	3.86671	***		834.079	217.159	3.84087	1.94143	*		834.079	4099.06	0.203481	-2.29703		**
KIAA1393	tRNA (guanine-N(1)-)-methyltransferase (EC 2.1.1.31) (M1G- methyltransferase) (tRNA [GM37] methyltransferase) (tRNA methyltransferase 5). [Source:Uniprot/SWISSPROT;Acc:Q32P41]	GO:0008033-tRNA processing	GO:0003677-DNA binding;GO:0008168-methyltransferase activity;GO:0009019-tRNA (guanine-N1-)-methyltransferase activity;GO:0016740-transferase activity	GO:0000785-chromatin;GO:0005634-nucleus	96.6017	9.86433	9.79303	3.29176	***		370.53	9.86433	37.5626	5.23122	***		370.53	96.6017	3.83564	1.93947	*		370.53	2055.17	0.180291	-2.4716		**
-	-	-	-	-	69.802	46.6193	1.49728	0.582341			267.317	46.6193	5.73404	2.51955	**		267.317	69.802	3.82965	1.93721	*		267.317	718.862	0.371862	-1.42716		*
TRIM6	Tripartite motif-containing protein 6 (RING finger protein 89). [Source:Uniprot/SWISSPROT;Acc:Q9C030]	-	GO:0005515-protein binding;GO:0008270-zinc ion binding;GO:0046872-metal ion binding	GO:0005622-intracellular	9.14405	3.22076	2.83909	1.50543	*		34.8796	3.22076	10.8296	3.43691	***		34.8796	9.14405	3.81446	1.93148	*		34.8796	234.868	0.148507	-2.7514		**
-	-	GO:0000074-regulation of progression through cell cycle;GO:0006350-transcription;GO:0006355-regulation of transcription, DNA-dependent;GO:0006366-transcription from RNA polymerase II promoter;GO:0006919-caspase activation;GO:0007165-signal transduction;GO:0007242-intracellular signaling cascade;GO:0007249-I-kappaB kinase/NF-kappaB cascade;GO:0007260-tyrosine phosphorylation of STAT protein;GO:000…	GO:0003700-transcription factor activity;GO:0004871-signal transducer activity;GO:0005062-hematopoietin/interferon-class (D200-domain) cytokine receptor signal transducer activity;GO:0005509-calcium ion binding;GO:0005515-protein binding	GO:0005634-nucleus;GO:0005737-cytoplasm	93.1377	27.8319	3.34644	1.74263	*		354.894	27.8319	12.7514	3.67258	***		354.894	93.1377	3.81042	1.92995	*		354.894	964.011	0.368143	-1.44166		*
-	-	-	-	-	403.135	60.1687	6.70008	2.74418	**		1534.44	60.1687	25.5023	4.67256	***		1534.44	403.135	3.80627	1.92838	*		1534.44	5821.41	0.263586	-1.92366		*
-	ribosomal protein S6 pseudogene 1 (RPS6P1), mRNA [Source:RefSeq_dna;Acc:XR_016837]	-	-	-	51.1401	5.82419	8.78063	3.13432	***		194.382	5.82419	33.375	5.0607	***		194.382	51.1401	3.80098	1.92637	*		194.382	3186.57	0.0610005	-4.03504		***
-	60S ribosomal protein L12. [Source:Uniprot/SWISSPROT;Acc:P30050]	GO:0006412-translation	GO:0003735-structural constituent of ribosome	GO:0005622-intracellular;GO:0005840-ribosome	47.3556	18.6837	2.53459	1.34175	*		179.244	18.6837	9.5936	3.26207	***		179.244	47.3556	3.78507	1.92032	*		179.244	3159.48	0.0567321	-4.13969		***
XP_495912.1	40S ribosomal protein S6 (Phosphoprotein NP33). [Source:Uniprot/SWISSPROT;Acc:P62753]	GO:0006412-translation;GO:0042593-glucose homeostasis	GO:0003723-RNA binding;GO:0003735-structural constituent of ribosome;GO:0005515-protein binding	GO:0005622-intracellular;GO:0005634-nucleus;GO:0005843-cytosolic small ribosomal subunit (sensu Eukaryota)	11.905	9.69694	1.22771	0.295966			45.0006	9.69694	4.6407	2.21434	**		45.0006	11.905	3.77997	1.91838	*		45.0006	8023.16	0.00560884	-7.47808		***
XP_068430.1	-	-	-	-	19.4934	3.99712	4.87686	2.28595	**		73.5757	3.99712	18.4072	4.2022	***		73.5757	19.4934	3.77438	1.91624	*		73.5757	226.457	0.324899	-1.62194		*
XP_496190.1	60S ribosomal protein L17 (L23). [Source:Uniprot/SWISSPROT;Acc:P18621]	-	-	-	24.1525	2.34064	10.3187	3.36719	***		91.1142	2.34064	38.927	5.2827	***		91.1142	24.1525	3.77246	1.91551	*		91.1142	7466.5	0.0122031	-6.35661		***
COMMD6	COMM domain-containing protein 6. [Source:Uniprot/SWISSPROT;Acc:Q7Z4G1]	-	-	-	98.3509	13.9787	7.03577	2.81471	**		370.585	13.9787	26.5107	4.7285	***		370.585	98.3509	3.76798	1.91379	*		370.585	1886.15	0.196476	-2.34757		**
XCL1	Lymphotactin precursor (XCL1) (Cytokine SCM-1) (ATAC) (Lymphotaxin) (SCM-1-alpha) (Small inducible cytokine C1) (XC chemokine ligand 1). [Source:Uniprot/SWISSPROT;Acc:P47992]	GO:0006874-calcium ion homeostasis;GO:0006935-chemotaxis;GO:0006955-immune response;GO:0007165-signal transduction;GO:0007267-cell-cell signaling	GO:0008009-chemokine activity	GO:0005576-extracellular region;GO:0005615-extracellular space	6.44149	7.24423	0.889189	-0.169439			24.1919	7.24423	3.33947	1.73962	*		24.1919	6.44149	3.75563	1.90906	*		24.1919	20.7783	1.16428	0.219443
GTF2I	General transcription factor II-I (GTFII-I) (TFII-I) (Bruton tyrosine kinase-associated protein 135) (BTK-associated protein 135) (BAP-135) (SRF-Phox1-interacting protein) (SPIN) (Williams-Beuren syndrome chromosome region 6 protein). [Source:Uniprot/SWISSPROT;Acc:P78347]	GO:0006350-transcription;GO:0006355-regulation of transcription, DNA-dependent;GO:0006367-transcription initiation from RNA polymerase II promoter;GO:0007165-signal transduction	GO:0003700-transcription factor activity;GO:0005515-protein binding;GO:0016251-general RNA polymerase II transcription factor activity	GO:0005634-nucleus	11.3872	5.59243	2.03618	1.02586	*		42.7397	5.59243	7.64242	2.93403	**		42.7397	11.3872	3.75331	1.90816	*		42.7397	19.5194	2.1896	1.13066	*
-	-	GO:0006412-translation	GO:0003735-structural constituent of ribosome	GO:0005622-intracellular;GO:0005840-ribosome	97.2986	8.60427	11.3082	3.49929	***		364.78	8.60427	42.3952	5.40583	***		364.78	97.2986	3.74908	1.90654	*		364.78	5428.62	0.0671958	-3.89549		***
MCM5	DNA replication licensing factor MCM5 (CDC46 homolog) (P1-CDC46). [Source:Uniprot/SWISSPROT;Acc:P33992]	GO:0000074-regulation of progression through cell cycle;GO:0006260-DNA replication;GO:0006270-DNA replication initiation;GO:0006350-transcription;GO:0006355-regulation of transcription, DNA-dependent	GO:0000166-nucleotide binding;GO:0003677-DNA binding;GO:0005515-protein binding;GO:0005524-ATP binding;GO:0008094-DNA-dependent ATPase activity	GO:0005634-nucleus	44.3727	38.3658	1.15657	0.20985			166.147	38.3658	4.33061	2.11457	**		166.147	44.3727	3.74436	1.90472	*		166.147	78.6935	2.11132	1.07815	*
-	-	-	-	-	123.151	14.2701	8.62995	3.10935	***		460.095	14.2701	32.2418	5.01086	***		460.095	123.151	3.73604	1.90151	*		460.095	738.634	0.6229	-0.682928
KRT18	Keratin, type I cytoskeletal 18 (Cytokeratin-18) (CK-18) (Keratin-18) (K18). [Source:Uniprot/SWISSPROT;Acc:P05783]	GO:0009653-anatomical structure morphogenesis	GO:0005200-structural constituent of cytoskeleton;GO:0005515-protein binding	GO:0005882-intermediate filament	291.066	200.21	1.4538	0.539828			1086.42	200.21	5.42641	2.44	**		1086.42	291.066	3.73257	1.90017	*		1086.42	1354.25	0.802233	-0.317906
NP_005508.1	Nonhistone chromosomal protein HMG-17 (High-mobility group nucleosome- binding domain-containing protein 2). [Source:Uniprot/SWISSPROT;Acc:P05204]	-	-	-	1299.31	422.983	3.07177	1.61907	*		4797.23	422.983	11.3414	3.50353	***		4797.23	1299.31	3.69214	1.88446	*		4797.23	8277.92	0.579521	-0.787068
Q96DN7_HUMAN	Brother of CDO precursor (Protein BOC). [Source:Uniprot/SWISSPROT;Acc:Q9BWV1]	GO:0007155-cell adhesion;GO:0045663-positive regulation of myoblast differentiation	GO:0005515-protein binding	GO:0016020-membrane;GO:0016021-integral to membrane	24.5588	11.113	2.20992	1.14399	*		90.2495	11.113	8.1211	3.02167	***		90.2495	24.5588	3.67484	1.87768	*		90.2495	165.154	0.546457	-0.87182
EIF3S1	Eukaryotic translation initiation factor 3 subunit 1 (eIF-3 alpha) (eIF3 p35) (eIF3j). [Source:Uniprot/SWISSPROT;Acc:O75822]	GO:0006412-translation;GO:0006446-regulation of translational initiation	GO:0003743-translation initiation factor activity;GO:0005515-protein binding	GO:0005852-eukaryotic translation initiation factor 3 complex	36.8426	10.7584	3.42455	1.77591	*		135.324	10.7584	12.5785	3.65288	***		135.324	36.8426	3.67303	1.87697	*		135.324	628.262	0.215394	-2.21495		**
NP_940848.1	Uncharacterized protein C1orf122. [Source:Uniprot/SWISSPROT;Acc:Q6ZSJ8]	-	-	-	137.818	25.309	5.44541	2.44504	**		505.826	25.309	19.9861	4.32092	***		505.826	137.818	3.67026	1.87588	*		505.826	919.28	0.550242	-0.861862
XP_496612.1	-	GO:0006414-translational elongation	GO:0003723-RNA binding;GO:0003735-structural constituent of ribosome;GO:0005515-protein binding	GO:0005622-intracellular;GO:0005840-ribosome;GO:0005842-cytosolic large ribosomal subunit (sensu Eukaryota)	4674.98	2066.44	2.26233	1.17781	*		17114.2	2066.44	8.28196	3.04997	***		17114.2	4674.98	3.6608	1.87216	*		17114.2	26430.3	0.647523	-0.626998
XP_498099.1	OTTHUMP00000016594. [Source:Uniprot/SPTREMBL;Acc:Q9NU98]	GO:0006412-translation	GO:0003735-structural constituent of ribosome	GO:0005622-intracellular;GO:0005840-ribosome	30.6521	9.47926	3.2336	1.69314	*		112.043	9.47926	11.8198	3.56314	***		112.043	30.6521	3.65532	1.87	*		112.043	1026.37	0.109164	-3.19543		***
TAX1BP3	Tax1-binding protein 3 (Tax interaction protein 1) (TIP-1) (Glutaminase-interacting protein 3). [Source:Uniprot/SWISSPROT;Acc:O14907]	GO:0006811-ion transport;GO:0007266-Rho protein signal transduction;GO:0016055-Wnt receptor signaling pathway;GO:0030178-negative regulation of Wnt receptor signaling pathway	GO:0004872-receptor activity;GO:0005216-ion channel activity;GO:0005515-protein binding;GO:0005524-ATP binding	GO:0005634-nucleus;GO:0005737-cytoplasm;GO:0016020-membrane;GO:0016021-integral to membrane	96.696	30.5092	3.16941	1.66421	*		351.895	30.5092	11.5341	3.52783	***		351.895	96.696	3.63919	1.86362	*		351.895	344.318	1.02201	0.0314035
XP_371019.1	-	-	-	-	147.381	4.00965	36.7566	5.19993	***		535.563	4.00965	133.569	7.06144	***		535.563	147.381	3.63387	1.86151	*		535.563	6686.26	0.080099	-3.64207		***
MXD4	Max-interacting transcriptional repressor MAD4 (Max-associated protein 4) (MAX dimerization protein 4). [Source:Uniprot/SWISSPROT;Acc:Q14582]	GO:0000122-negative regulation of transcription from RNA polymerase II promoter;GO:0006355-regulation of transcription, DNA-dependent;GO:0008285-negative regulation of cell proliferation;GO:0045449-regulation of transcription	GO:0003677-DNA binding;GO:0003714-transcription corepressor activity;GO:0005515-protein binding;GO:0030528-transcription regulator activity	GO:0005634-nucleus	75.1008	13.7914	5.44546	2.44505	**		272.884	13.7914	19.7865	4.30644	***		272.884	75.1008	3.63357	1.86139	*		272.884	44.3632	6.15113	2.62085	**
-	-	-	-	-	89.6948	10.6875	8.39252	3.0691	***		325.522	10.6875	30.4582	4.92876	***		325.522	89.6948	3.62921	1.85966	*		325.522	2256.71	0.144246	-2.7934		**
-	-	-	-	-	277.246	84.5434	3.27933	1.7134	*		1005.62	84.5434	11.8947	3.57225	***		1005.62	277.246	3.62719	1.85885	*		1005.62	2466.81	0.407662	-1.29456		*
SEC11L3	Microsomal signal peptidase 21 kDa subunit (EC 3.4.-.-) (SPase 21 kDa subunit) (SPC21) (SEC11-like 3). [Source:Uniprot/SWISSPROT;Acc:Q9BY50]	GO:0006465-signal peptide processing;GO:0006508-proteolysis	GO:0008236-serine-type peptidase activity	GO:0005783-endoplasmic reticulum;GO:0005792-microsome;GO:0016020-membrane;GO:0016021-integral to membrane	13.9653	7.28077	1.91811	0.939688			50.5339	7.28077	6.94074	2.79509	**		50.5339	13.9653	3.61852	1.8554	*		50.5339	413.444	0.122227	-3.03237		***
FOXC1	Forkhead box protein C1 (Forkhead-related protein FKHL7) (Forkhead- related transcription factor 3) (FREAC-3). [Source:Uniprot/SWISSPROT;Acc:Q12948]	GO:0001503-ossification;GO:0001541-ovarian follicle development;GO:0001657-ureteric bud development;GO:0001701-in utero embryonic development;GO:0001822-kidney development;GO:0001974-blood vessel remodeling;GO:0006350-transcription;GO:0006355-regulation of transcription, DNA-dependent;GO:0007219-Notch signaling pathway;GO:0007420-brain development;GO:0007507-heart development;GO:0008354-germ cell…	GO:0003700-transcription factor activity;GO:0008134-transcription factor binding;GO:0008301-DNA bending activity;GO:0016563-transcriptional activator activity;GO:0043565-sequence-specific DNA binding	GO:0005634-nucleus;GO:0005720-nuclear heterochromatin	10.0363	10.856	0.924495	-0.113263			36.2388	10.856	3.33815	1.73905	*		36.2388	10.0363	3.61078	1.85231	*		36.2388	57.9979	0.62483	-0.678464
COX7C	Cytochrome c oxidase subunit 7C, mitochondrial precursor (EC 1.9.3.1) (Cytochrome c oxidase polypeptide VIIc). [Source:Uniprot/SWISSPROT;Acc:P15954]	GO:0006118-electron transport	GO:0004129-cytochrome-c oxidase activity;GO:0016491-oxidoreductase activity	GO:0005739-mitochondrion;GO:0016020-membrane;GO:0016021-integral to membrane	53.5792	8.42442	6.35999	2.66902	**		193.384	8.42442	22.9551	4.52074	***		193.384	53.5792	3.6093	1.85172	*		193.384	2913.21	0.0663815	-3.91307		***
HIST1H1C	Histone H1.2 (Histone H1d). [Source:Uniprot/SWISSPROT;Acc:P16403]	GO:0006334-nucleosome assembly;GO:0007001-chromosome organization and biogenesis (sensu Eukaryota);GO:0016584-nucleosome spacing	GO:0003677-DNA binding;GO:0005515-protein binding	GO:0000786-nucleosome;GO:0005634-nucleus;GO:0005694-chromosome	67.1602	6.83645	9.82383	3.29629	***		241.528	6.83645	35.3295	5.1428	***		241.528	67.1602	3.5963	1.84651	*		241.528	1510.76	0.159872	-2.64501		**
TRIM16	Tripartite motif-containing protein 16 (Estrogen-responsive B box protein). [Source:Uniprot/SWISSPROT;Acc:O95361]	-	GO:0003700-transcription factor activity;GO:0008270-zinc ion binding;GO:0046872-metal ion binding	GO:0005622-intracellular;GO:0005737-cytoplasm	21.827	3.997	5.46084	2.44912	**		78.4751	3.997	19.6335	4.29524	***		78.4751	21.827	3.59532	1.84612	*		78.4751	145.665	0.538736	-0.892349
HTRA4_HUMAN	Probable serine protease HTRA4 precursor (EC 3.4.21.-). [Source:Uniprot/SWISSPROT;Acc:P83105]	GO:0006508-proteolysis	GO:0004252-serine-type endopeptidase activity;GO:0005515-protein binding;GO:0008233-peptidase activity	-	10.1864	6.89484	1.47739	0.56305			36.4271	6.89484	5.28324	2.40142	**		36.4271	10.1864	3.57606	1.83837	*		36.4271	33.1176	1.09993	0.137413
-	-	-	-	-	41.1869	20.9781	1.96333	0.973304			147.122	20.9781	7.01315	2.81006	**		147.122	41.1869	3.57207	1.83676	*		147.122	764.413	0.192464	-2.37734		**
SPR	Sepiapterin reductase (EC 1.1.1.153) (SPR). [Source:Uniprot/SWISSPROT;Acc:P35270]	GO:0006118-electron transport;GO:0006729-tetrahydrobiopterin biosynthetic process;GO:0006809-nitric oxide biosynthetic process;GO:0008152-metabolic process	GO:0004033-aldo-keto reductase activity;GO:0004757-sepiapterin reductase activity;GO:0016491-oxidoreductase activity;GO:0050661-NADP binding	-	117.628	32.148	3.65894	1.87143	*		419.65	32.148	13.0537	3.70638	***		419.65	117.628	3.56761	1.83496	*		419.65	403.072	1.04113	0.058149
RL27_HUMAN	60S ribosomal protein L27. [Source:Uniprot/SWISSPROT;Acc:P61353]	GO:0006412-translation	GO:0003735-structural constituent of ribosome	GO:0005622-intracellular;GO:0005840-ribosome	153.25	10.8914	14.0708	3.81463	***		542.211	10.8914	49.7834	5.63759	***		542.211	153.25	3.53808	1.82297	*		542.211	5405.19	0.100313	-3.31742		***
NP_001007540.1	-	-	-	-	102.83	21.3509	4.8162	2.26789	**		363.486	21.3509	17.0244	4.08953	***		363.486	102.83	3.53483	1.82164	*		363.486	2409.99	0.150824	-2.72906		**
XP_377716.2	similar to 40S ribosomal protein S17 (LOC402057), mRNA [Source:RefSeq_dna;Acc:NM_001080499]	GO:0006412-translation	GO:0003735-structural constituent of ribosome	GO:0005622-intracellular;GO:0005840-ribosome	107.181	8.65345	12.3859	3.63063	***		378.553	8.65345	43.7459	5.45108	***		378.553	107.181	3.5319	1.82045	*		378.553	4993.99	0.0758017	-3.72163		***
MCM2	DNA replication licensing factor MCM2 (Minichromosome maintenance protein 2 homolog) (Nuclear protein BM28). [Source:Uniprot/SWISSPROT;Acc:P49736]	GO:0006260-DNA replication;GO:0006268-DNA unwinding during replication;GO:0006270-DNA replication initiation;GO:0006334-nucleosome assembly;GO:0006350-transcription;GO:0006355-regulation of transcription, DNA-dependent;GO:0007049-cell cycle	GO:0000166-nucleotide binding;GO:0003677-DNA binding;GO:0003688-DNA replication origin binding;GO:0005515-protein binding;GO:0005524-ATP binding;GO:0008094-DNA-dependent ATPase activity;GO:0008270-zinc ion binding;GO:0046872-metal ion binding	GO:0000785-chromatin;GO:0005634-nucleus;GO:0005664-nuclear origin of replication recognition complex	16.7436	5.26842	3.1781	1.66817	*		59.1273	5.26842	11.223	3.48838	***		59.1273	16.7436	3.53134	1.82022	*		59.1273	59.1983	0.998801	-0.00173137
UQCRH	Ubiquinol-cytochrome c reductase complex 11 kDa protein, mitochondrial precursor (EC 1.10.2.2) (Mitochondrial hinge protein) (Cytochrome c1 nonheme 11 kDa protein) (Complex III subunit VIII). [Source:Uniprot/SWISSPROT;Acc:P07919]	GO:0006119-oxidative phosphorylation;GO:0006122-mitochondrial electron transport, ubiquinol to cytochrome c;GO:0006810-transport;GO:0009060-aerobic respiration	GO:0008121-ubiquinol-cytochrome-c reductase activity;GO:0016491-oxidoreductase activity	GO:0005739-mitochondrion;GO:0005746-mitochondrial electron transport chain;GO:0016020-membrane	153.018	69.9898	2.1863	1.12849	*		539.099	69.9898	7.70253	2.94533	**		539.099	153.018	3.5231	1.81684	*		539.099	1816.48	0.296782	-1.75252		*
XP_496890.1	-	-	-	-	9.27755	3.10942	2.98369	1.5771	*		32.6485	3.10942	10.4998	3.3923	***		32.6485	9.27755	3.51908	1.8152	*		32.6485	1521.89	0.0214526	-5.54271		***
CDC16_HUMAN	Cell division cycle protein 16 homolog (CDC16Hs) (Anaphase-promoting complex subunit 6) (APC6) (Cyclosome subunit 6). [Source:Uniprot/SWISSPROT;Acc:Q13042]	GO:0006512-ubiquitin cycle;GO:0007049-cell cycle;GO:0007088-regulation of mitosis;GO:0008283-cell proliferation;GO:0051301-cell division	GO:0005488-binding;GO:0005515-protein binding	GO:0005634-nucleus;GO:0005737-cytoplasm;GO:0005813-centrosome;GO:0005876-spindle microtubule	103.339	49.3051	2.09592	1.06758	*		362.938	49.3051	7.36106	2.87991	**		362.938	103.339	3.5121	1.81233	*		362.938	605.837	0.599068	-0.739208
NP_057484.3	Small EDRK-rich factor 2 (4F5rel) (h4F5rel) (Gastric cancer-related protein VRG107). [Source:Uniprot/SWISSPROT;Acc:P84101]	-	-	-	42.1249	22.2256	1.89533	0.922451			147.683	22.2256	6.6447	2.7322	**		147.683	42.1249	3.50583	1.80975	*		147.683	335.195	0.440586	-1.1825		*
RS27A_HUMAN	40S ribosomal protein S27a. [Source:Uniprot/SWISSPROT;Acc:P62979]	GO:0006412-translation;GO:0006464-protein modification	GO:0003735-structural constituent of ribosome;GO:0008270-zinc ion binding;GO:0046872-metal ion binding	GO:0005622-intracellular;GO:0005840-ribosome;GO:0005843-cytosolic small ribosomal subunit (sensu Eukaryota)	2707.73	986.35	2.7452	1.45691	*		9456.25	986.35	9.58711	3.2611	***		9456.25	2707.73	3.49232	1.80419	*		9456.25	20830.9	0.453952	-1.13939		*
ARHGAP5	Rho GTPase-activating protein 5 (p190-B). [Source:Uniprot/SWISSPROT;Acc:Q13017]	GO:0007155-cell adhesion;GO:0007165-signal transduction;GO:0007264-small GTPase mediated signal transduction;GO:0007266-Rho protein signal transduction	GO:0003924-GTPase activity;GO:0005096-GTPase activator activity;GO:0005100-Rho GTPase activator activity;GO:0005525-GTP binding;GO:0042169-SH2 domain binding	GO:0005622-intracellular;GO:0005737-cytoplasm;GO:0016020-membrane	8.65678	8.77511	0.986516	-0.0195852			30.2019	8.77511	3.44177	1.78315	*		30.2019	8.65678	3.48881	1.80274	*		30.2019	31.8039	0.949629	-0.0745639
Q6NVV8_HUMAN	IAH1 protein (Fragment). [Source:Uniprot/SPTREMBL;Acc:Q6PCA9]	GO:0006629-lipid metabolic process	GO:0016788-hydrolase activity, acting on ester bonds	-	21.5693	7.59615	2.8395	1.50564	*		75.1241	7.59615	9.88976	3.30594	***		75.1241	21.5693	3.48292	1.8003	*		75.1241	353.869	0.212293	-2.23587		**
SLC27A3	Long-chain fatty acid transport protein 3 (EC 6.2.1.-) (Fatty acid transport protein 3) (FATP-3) (Very long-chain acyl-CoA synthetase homolog 3) (VLCS-3) (Solute carrier family 27 member 3). [Source:Uniprot/SWISSPROT;Acc:Q5K4L6]	GO:0006629-lipid metabolic process;GO:0006631-fatty acid metabolic process;GO:0008152-metabolic process	GO:0000166-nucleotide binding;GO:0004321-fatty-acyl-CoA synthase activity;GO:0016874-ligase activity	GO:0005739-mitochondrion;GO:0016020-membrane;GO:0016021-integral to membrane	97.1367	18.9886	5.11552	2.35488	**		337.595	18.9886	17.7788	4.15208	***		337.595	97.1367	3.47546	1.7972	*		337.595	380.303	0.887699	-0.171858
CDK4	Cell division protein kinase 4 (EC 2.7.11.22) (Cyclin-dependent kinase 4) (PSK-J3). [Source:Uniprot/SWISSPROT;Acc:P11802]	GO:0000074-regulation of progression through cell cycle;GO:0000082-G1/S transition of mitotic cell cycle;GO:0006468-protein amino acid phosphorylation;GO:0007049-cell cycle;GO:0007165-signal transduction;GO:0042127-regulation of cell proliferation;GO:0051301-cell division	GO:0000166-nucleotide binding;GO:0004674-protein serine/threonine kinase activity;GO:0004693-cyclin-dependent protein kinase activity;GO:0005515-protein binding;GO:0005524-ATP binding;GO:0016740-transferase activity	GO:0000307-cyclin-dependent protein kinase holoenzyme complex;GO:0005634-nucleus;GO:0005667-transcription factor complex	9.50515	4.358	2.18108	1.12504	*		32.9257	4.358	7.55523	2.91748	**		32.9257	9.50515	3.46399	1.79243	*		32.9257	33.6754	0.977738	-0.0324807
MT1J	-	-	GO:0005507-copper ion binding;GO:0008270-zinc ion binding;GO:0046870-cadmium ion binding;GO:0046872-metal ion binding	-	56.4782	23.0869	2.44633	1.29062	*		195.567	23.0869	8.4709	3.08251	***		195.567	56.4782	3.4627	1.7919	*		195.567	655.443	0.298373	-1.74481		*
XP_070233.3	-	-	-	-	9.53537	2.67979	3.55825	1.83117	*		32.9863	2.67979	12.3093	3.62167	***		32.9863	9.53537	3.45936	1.7905	*		32.9863	1501.15	0.021974	-5.50806		***
C6orf108	c-Myc-responsive protein Rcl. [Source:Uniprot/SWISSPROT;Acc:O43598]	GO:0008283-cell proliferation	-	GO:0005634-nucleus	219.5	76.0693	2.88553	1.52884	*		756.986	76.0693	9.95127	3.31488	***		756.986	219.5	3.44868	1.78604	*		756.986	249.21	3.03754	1.6029	*
RL8_HUMAN	60S ribosomal protein L8. [Source:Uniprot/SWISSPROT;Acc:P62917]	GO:0006412-translation	GO:0003735-structural constituent of ribosome;GO:0019843-rRNA binding	GO:0005622-intracellular;GO:0005840-ribosome;GO:0005842-cytosolic large ribosomal subunit (sensu Eukaryota)	147.665	19.1606	7.70671	2.94611	**		507.471	19.1606	26.4852	4.72711	***		507.471	147.665	3.43664	1.781	*		507.471	4126.96	0.122965	-3.02368		***
TIMM13	Mitochondrial import inner membrane translocase subunit Tim13. [Source:Uniprot/SWISSPROT;Acc:Q9Y5L4]	GO:0006457-protein folding;GO:0007605-sensory perception of sound;GO:0015031-protein transport;GO:0045039-protein import into mitochondrial inner membrane	GO:0005515-protein binding;GO:0008270-zinc ion binding;GO:0046872-metal ion binding	GO:0005739-mitochondrion;GO:0005744-mitochondrial inner membrane presequence translocase complex;GO:0016020-membrane;GO:0042719-mitochondrial intermembrane space protein transporter complex	8.52245	2.62671	3.24453	1.69801	*		29.2687	2.62671	11.1427	3.47803	***		29.2687	8.52245	3.4343	1.78002	*		29.2687	27.4036	1.06806	0.09499
Q9BXG3_HUMAN	-	-	-	-	94.8819	75.9816	1.24875	0.320484			324.829	75.9816	4.27511	2.09596	**		324.829	94.8819	3.42351	1.77548	*		324.829	980.569	0.331266	-1.59394		*
CHCHD1	Coiled-coil-helix-coiled-coil-helix domain-containing protein 1 (C2360). [Source:Uniprot/SWISSPROT;Acc:Q96BP2]	-	-	GO:0005634-nucleus	10.9508	4.62752	2.36644	1.24272	*		37.4522	4.62752	8.09336	3.01674	***		37.4522	10.9508	3.42005	1.77402	*		37.4522	482.387	0.0776393	-3.68707		***
ITM2B	Integral membrane protein 2B (Transmembrane protein BRI) [Contains: ABri/ADan amyloid peptide]. [Source:Uniprot/SWISSPROT;Acc:Q9Y287]	GO:0006915-apoptosis;GO:0006917-induction of apoptosis;GO:0007399-nervous system development;GO:0007605-sensory perception of sound	GO:0005515-protein binding;GO:0005524-ATP binding	GO:0005624-membrane fraction;GO:0005887-integral to plasma membrane;GO:0016020-membrane	64.839	2.25708	28.7269	4.84433	***		220.044	2.25708	97.4905	6.60719	***		220.044	64.839	3.3937	1.76286	*		220.044	3285.12	0.066982	-3.90008		***
-	-	-	-	-	45.5634	5.66367	8.04486	3.00807	***		154.47	5.66367	27.2738	4.76944	***		154.47	45.5634	3.39022	1.76138	*		154.47	563.736	0.274011	-1.86769		*
ANXA11	Annexin A11 (Annexin XI) (Calcyclin-associated annexin 50) (CAP-50) (56 kDa autoantigen). [Source:Uniprot/SWISSPROT;Acc:P50995]	GO:0006955-immune response	GO:0005509-calcium ion binding;GO:0005515-protein binding;GO:0005544-calcium-dependent phospholipid binding;GO:0008429-phosphatidylethanolamine binding	GO:0005634-nucleus;GO:0005635-nuclear envelope;GO:0005654-nucleoplasm;GO:0005737-cytoplasm	19.4565	4.38842	4.43361	2.14848	**		65.9352	4.38842	15.0248	3.90928	***		65.9352	19.4565	3.38885	1.7608	*		65.9352	228.274	0.288843	-1.79164		*
NT5C	5'(3')-deoxyribonucleotidase, cytosolic type (EC 3.1.3.-) (Cytosolic 5',3'-pyrimidine nucleotidase) (Deoxy-5'-nucleotidase 1) (dNT-1). [Source:Uniprot/SWISSPROT;Acc:Q8TCD5]	GO:0009117-nucleotide metabolic process;GO:0009223-pyrimidine deoxyribonucleotide catabolic process;GO:0016311-dephosphorylation	GO:0000287-magnesium ion binding;GO:0008253-5'-nucleotidase activity;GO:0016787-hydrolase activity;GO:0019103-pyrimidine nucleotide binding	GO:0005634-nucleus;GO:0005737-cytoplasm	91.2403	103.644	0.880324	-0.183894			308.805	103.644	2.97948	1.57506	*		308.805	91.2403	3.38453	1.75895	*		308.805	55.0605	5.60847	2.48761	**
XP_496668.1	-	GO:0006412-translation	GO:0003723-RNA binding;GO:0003735-structural constituent of ribosome;GO:0005515-protein binding	GO:0005622-intracellular;GO:0005843-cytosolic small ribosomal subunit (sensu Eukaryota)	99.8801	3.89579	25.638	4.68021	***		337.791	3.89579	86.7067	6.43807	***		337.791	99.8801	3.38197	1.75786	*		337.791	6389.26	0.0528686	-4.24145		***
GLMB_HUMAN	Glia maturation factor beta (GMF-beta). [Source:Uniprot/SWISSPROT;Acc:P60983]	GO:0006468-protein amino acid phosphorylation;GO:0007165-signal transduction;GO:0007399-nervous system development	GO:0003779-actin binding;GO:0004860-protein kinase inhibitor activity;GO:0004871-signal transducer activity;GO:0008047-enzyme activator activity;GO:0008083-growth factor activity	GO:0005622-intracellular	12.7609	4.30084	2.96706	1.56904	*		43.1542	4.30084	10.0339	3.32681	***		43.1542	12.7609	3.38176	1.75777	*		43.1542	189.014	0.228312	-2.13092		**
PGM1	Phosphoglucomutase-1 (EC 5.4.2.2) (Glucose phosphomutase 1) (PGM 1). [Source:Uniprot/SWISSPROT;Acc:P36871]	GO:0005975-carbohydrate metabolic process;GO:0006006-glucose metabolic process	GO:0000287-magnesium ion binding;GO:0004614-phosphoglucomutase activity;GO:0016853-isomerase activity	GO:0005737-cytoplasm	6.56197	4.96556	1.3215	0.402172			22.1497	4.96556	4.46065	2.15726	**		22.1497	6.56197	3.37546	1.75508	*		22.1497	480.952	0.0460538	-4.44054		***
Q8TA88_HUMAN	Novel protein. [Source:Uniprot/SPTREMBL;Acc:Q5JTJ2]	GO:0006118-electron transport	GO:0004129-cytochrome-c oxidase activity	GO:0005739-mitochondrion	8.8957	2.95228	3.01316	1.59128	*		29.9588	2.95228	10.1477	3.34308	***		29.9588	8.8957	3.36779	1.7518	*		29.9588	377.563	0.0793478	-3.65567		***
ATP6V1D	-	GO:0006811-ion transport;GO:0015986-ATP synthesis coupled proton transport;GO:0015992-proton transport	GO:0016787-hydrolase activity;GO:0046872-metal ion binding;GO:0046933-hydrogen ion transporting ATP synthase activity, rotational mechanism;GO:0046961-hydrogen ion transporting ATPase activity, rotational mechanism	GO:0016469-proton-transporting two-sector ATPase complex	87.4967	45.2587	1.93326	0.951035			294.583	45.2587	6.50888	2.70241	**		294.583	87.4967	3.36679	1.75137	*		294.583	757.475	0.388902	-1.36252		*
B2MG_HUMAN	Beta-2-microglobulin precursor [Contains: Beta-2-microglobulin variant pI 5.3]. [Source:Uniprot/SWISSPROT;Acc:P61769]	GO:0002474-antigen processing and presentation of peptide antigen via MHC class I;GO:0006955-immune response	GO:0005515-protein binding	GO:0005576-extracellular region;GO:0042612-MHC class I protein complex	723.665	40.6999	17.7805	4.15223	***		2434.69	40.6999	59.8205	5.90257	***		2434.69	723.665	3.36439	1.75034	*		2434.69	14586	0.16692	-2.58277		**
GTF2A2	Transcription initiation factor IIA gamma chain (TFIIA P12 subunit) (TFIIA-12) (TFIIAS) (TFIIA-gamma). [Source:Uniprot/SWISSPROT;Acc:P52657]	GO:0006350-transcription;GO:0006355-regulation of transcription, DNA-dependent;GO:0006367-transcription initiation from RNA polymerase II promoter	GO:0003700-transcription factor activity;GO:0003702-RNA polymerase II transcription factor activity	GO:0005634-nucleus;GO:0005672-transcription factor TFIIA complex	17.1777	5.55862	3.09027	1.62773	*		57.7222	5.55862	10.3843	3.37633	***		57.7222	17.1777	3.36031	1.74859	*		57.7222	321.901	0.179317	-2.47942		**
XP_370697.1	-	-	-	-	10.7445	5.32291	2.01853	1.01331	*		35.9537	5.32291	6.75453	2.75586	**		35.9537	10.7445	3.34626	1.74255	*		35.9537	2405.88	0.0149441	-6.06428		***
RL11_HUMAN	60S ribosomal protein L11 (CLL-associated antigen KW-12). [Source:Uniprot/SWISSPROT;Acc:P62913]	GO:0006412-translation;GO:0006605-protein targeting	GO:0003735-structural constituent of ribosome;GO:0005515-protein binding;GO:0019843-rRNA binding	GO:0005622-intracellular;GO:0005730-nucleolus;GO:0005840-ribosome;GO:0005842-cytosolic large ribosomal subunit (sensu Eukaryota)	31.7477	12.7185	2.49618	1.31972	*		106.235	12.7185	8.35275	3.06225	***		106.235	31.7477	3.34621	1.74253	*		106.235	5566.88	0.0190833	-5.71154		***
RL39_HUMAN	-	GO:0006412-translation	GO:0003723-RNA binding;GO:0003735-structural constituent of ribosome	GO:0005622-intracellular;GO:0005840-ribosome;GO:0005842-cytosolic large ribosomal subunit (sensu Eukaryota)	197.668	11.8412	16.6933	4.0612	***		660.065	11.8412	55.7431	5.80072	***		660.065	197.668	3.33925	1.73952	*		660.065	7510.61	0.0878843	-3.50825		***
NP_036524.1	Peflin (PEF protein with a long N-terminal hydrophobic domain) (Penta- EF hand domain-containing protein 1). [Source:Uniprot/SWISSPROT;Acc:Q9UBV8]	-	GO:0005509-calcium ion binding;GO:0005515-protein binding	GO:0016020-membrane	6.09479	4.15396	1.46723	0.553091			20.352	4.15396	4.89943	2.29261	**		20.352	6.09479	3.33925	1.73952	*		20.352	72.1671	0.282012	-1.82617		*
XP_114317.3	Ribosomal protein L22-like 1. [Source:Uniprot/SWISSPROT;Acc:Q6P5R6]	GO:0006412-translation	GO:0003735-structural constituent of ribosome	GO:0005622-intracellular;GO:0005840-ribosome	47.4368	28.2786	1.67748	0.746294			158.403	28.2786	5.6015	2.48581	**		158.403	47.4368	3.33924	1.73952	*		158.403	441.178	0.359045	-1.47776		*
RL23_HUMAN	60S ribosomal protein L23 (Ribosomal protein L17). [Source:Uniprot/SWISSPROT;Acc:P62829]	GO:0006412-translation;GO:0006610-ribosomal protein import into nucleus	GO:0003735-structural constituent of ribosome	GO:0005622-intracellular;GO:0005840-ribosome	3205.15	1772.45	1.80832	0.854648			10699	1772.45	6.03627	2.59366	**		10699	3205.15	3.33806	1.73901	*		10699	16461.3	0.649948	-0.621604
SCARA3	Scavenger receptor class A member 3 (Cellular stress response gene protein). [Source:Uniprot/SWISSPROT;Acc:Q6AZY7]	GO:0006817-phosphate transport;GO:0006979-response to oxidative stress;GO:0009650-UV protection	GO:0005044-scavenger receptor activity	GO:0005737-cytoplasm;GO:0016020-membrane;GO:0016021-integral to membrane	7.95291	4.39348	1.81016	0.856116			26.5077	4.39348	6.03341	2.59297	**		26.5077	7.95291	3.33308	1.73686	*		26.5077	78.4207	0.338019	-1.56482		*
-	-	---	---	---	91.4772	8.96767	10.2008	3.35061	***		304	8.96767	33.8996	5.0832	***		304	91.4772	3.32324	1.73259	*		304	2251.2	0.135039	-2.88855		**
RGL1	Ral guanine nucleotide dissociation stimulator-like 1 (RalGDS-like 1). [Source:Uniprot/SWISSPROT;Acc:Q9NZL6]	GO:0007165-signal transduction;GO:0051056-regulation of small GTPase mediated signal transduction	GO:0005085-guanyl-nucleotide exchange factor activity;GO:0005515-protein binding;GO:0008321-Ral guanyl-nucleotide exchange factor activity	GO:0005575-cellular_component;GO:0005622-intracellular	64.8434	21.976	2.95065	1.56103	*		215.258	21.976	9.79515	3.29207	***		215.258	64.8434	3.31966	1.73103	*		215.258	368.271	0.584509	-0.774704
XP_373027.2	-	GO:0006412-translation	GO:0003735-structural constituent of ribosome	GO:0005622-intracellular;GO:0005840-ribosome	78.6624	2.61634	30.0658	4.91005	***		260.682	2.61634	99.6359	6.63859	***		260.682	78.6624	3.31393	1.72854	*		260.682	5906.6	0.0441339	-4.50197		***
SOX15	SOX-15 protein (SOX-20 protein) (SOX-12 protein). [Source:Uniprot/SWISSPROT;Acc:O60248]	GO:0006325-establishment and/or maintenance of chromatin architecture;GO:0006355-regulation of transcription, DNA-dependent;GO:0006357-regulation of transcription from RNA polymerase II promoter;GO:0008584-male gonad development	GO:0003700-transcription factor activity;GO:0003702-RNA polymerase II transcription factor activity	GO:0000785-chromatin;GO:0005634-nucleus	6.81963	6.9831	0.97659	-0.0341746			22.5534	6.9831	3.22971	1.6914	*		22.5534	6.81963	3.30713	1.72558	*		22.5534	12.6071	1.78894	0.839104
-	-	-	-	-	577.967	86.0855	6.71387	2.74715	**		1909.56	86.0855	22.1822	4.47133	***		1909.56	577.967	3.30393	1.72418	*		1909.56	6845.2	0.278964	-1.84185		*
XP_034623.1	Small nuclear ribonucleoprotein polypeptide E-like 1. [Source:Uniprot/SPTREMBL;Acc:Q5VYJ4]	GO:0016071-mRNA metabolic process	-	GO:0030529-ribonucleoprotein complex	6.41916	2.67257	2.40187	1.26416	*		21.1846	2.67257	7.92668	2.98672	**		21.1846	6.41916	3.30022	1.72256	*		21.1846	570.411	0.0371392	-4.75091		***
RPS9	40S ribosomal protein S9. [Source:Uniprot/SWISSPROT;Acc:P46781]	-	-	-	582.634	689.927	0.844486	-0.243854			1921.56	689.927	2.78517	1.47776	*		1921.56	582.634	3.29806	1.72162	*		1921.56	595.868	3.22481	1.68922	*
ATP5H	ATP synthase D chain, mitochondrial (EC 3.6.3.14). [Source:Uniprot/SWISSPROT;Acc:O75947]	GO:0006811-ion transport;GO:0015986-ATP synthesis coupled proton transport;GO:0015992-proton transport	GO:0046933-hydrogen ion transporting ATP synthase activity, rotational mechanism;GO:0046961-hydrogen ion transporting ATPase activity, rotational mechanism	GO:0005739-mitochondrion;GO:0016469-proton-transporting two-sector ATPase complex;GO:0045263-proton-transporting ATP synthase complex, coupling factor F(o)	19.5239	4.58697	4.25638	2.08963	**		64.2952	4.58697	14.0169	3.8091	***		64.2952	19.5239	3.29315	1.71947	*		64.2952	1687.2	0.0381077	-4.71378		***
PSA6_HUMAN	Proteasome subunit alpha type 6 (EC 3.4.25.1) (Proteasome iota chain) (Macropain iota chain) (Multicatalytic endopeptidase complex iota chain) (27 kDa prosomal protein) (PROS-27) (p27K). [Source:Uniprot/SWISSPROT;Acc:P60900]	GO:0006511-ubiquitin-dependent protein catabolic process	GO:0003723-RNA binding;GO:0004298-threonine endopeptidase activity;GO:0005515-protein binding	GO:0005829-cytosol;GO:0005839-proteasome core complex (sensu Eukaryota)	113.554	14.5144	7.82349	2.96781	**		373.315	14.5144	25.7203	4.68484	***		373.315	113.554	3.28757	1.71702	*		373.315	1314.22	0.284059	-1.81574		*
USP9X	Probable ubiquitin carboxyl-terminal hydrolase FAF-X (EC 3.1.2.15) (Ubiquitin thioesterase FAF-X) (Ubiquitin-specific-processing protease FAF-X) (Deubiquitinating enzyme FAF-X) (Fat facets protein-related, X- linked) (Ubiquitin-specific protease 9, X chro [Source:Uniprot/SWISSPROT;Acc:Q93008]	GO:0006511-ubiquitin-dependent protein catabolic process;GO:0006512-ubiquitin cycle;GO:0007292-female gamete generation	GO:0004197-cysteine-type endopeptidase activity;GO:0004221-ubiquitin thiolesterase activity;GO:0005515-protein binding	-	12.9185	3.08652	4.18544	2.06538	**		42.2234	3.08652	13.6799	3.77399	***		42.2234	12.9185	3.26845	1.70861	*		42.2234	440.315	0.0958935	-3.38242		***
RPL7	60S ribosomal protein L7. [Source:Uniprot/SWISSPROT;Acc:P18124]	GO:0006412-translation	GO:0003735-structural constituent of ribosome;GO:0030528-transcription regulator activity	GO:0005622-intracellular;GO:0015934-large ribosomal subunit	3442.33	1382.93	2.48915	1.31566	*		11249.3	1382.93	8.13441	3.02404	***		11249.3	3442.33	3.26794	1.70838	*		11249.3	26399.8	0.426114	-1.23069		*
ADH5	Alcohol dehydrogenase class 3 chi chain (EC 1.1.1.1) (Alcohol dehydrogenase class III chi chain) (S-(hydroxymethyl)glutathione dehydrogenase) (EC 1.1.1.284) (Glutathione-dependent formaldehyde dehydrogenase) (FDH). [Source:Uniprot/SWISSPROT;Acc:P11766]	GO:0001523-retinoid metabolic process;GO:0006069-ethanol oxidation	GO:0004022-alcohol dehydrogenase activity;GO:0004327-formaldehyde dehydrogenase (glutathione) activity;GO:0005504-fatty acid binding;GO:0008270-zinc ion binding;GO:0009055-electron carrier activity;GO:0046872-metal ion binding;GO:0051903-S-(hydroxymethyl)glutathione dehydrogenase activity	-	15.6685	4.02619	3.89165	1.96038	*		51.1676	4.02619	12.7087	3.66774	***		51.1676	15.6685	3.26563	1.70736	*		51.1676	524.509	0.0975533	-3.35767		***
HRASLS3	HRAS-like suppressor 3 (H-rev 107 protein homolog) (HREV107-3) (Renal carcinoma antigen NY-REN-65). [Source:Uniprot/SWISSPROT;Acc:P53816]	GO:0007049-cell cycle;GO:0008150-biological_process;GO:0045786-negative regulation of progression through cell cycle	GO:0003674-molecular_function	GO:0005575-cellular_component;GO:0016020-membrane;GO:0016021-integral to membrane	15.5695	2.62542	5.93029	2.5681	**		50.8193	2.62542	19.3566	4.27476	***		50.8193	15.5695	3.26403	1.70665	*		50.8193	501.696	0.101295	-3.30336		***
RUXG_HUMAN	Small nuclear ribonucleoprotein G (snRNP-G) (Sm protein G) (Sm-G) (SmG). [Source:Uniprot/SWISSPROT;Acc:P62308]	GO:0000245-spliceosome assembly;GO:0006397-mRNA processing;GO:0008380-RNA splicing	GO:0003723-RNA binding;GO:0005515-protein binding	GO:0005634-nucleus;GO:0005681-spliceosome;GO:0030532-small nuclear ribonucleoprotein complex	53.9234	21.0279	2.56438	1.35861	*		175.345	21.0279	8.33866	3.05982	***		175.345	53.9234	3.25173	1.70121	*		175.345	958.84	0.182872	-2.4511		**
-	-	-	-	-	27.0498	9.36903	2.88715	1.52965	*		87.624	9.36903	9.35252	3.22535	***		87.624	27.0498	3.23935	1.69571	*		87.624	1659.01	0.0528171	-4.24285		***
NP_443726.1	Putative uncharacterized protein TIGA1. [Source:Uniprot/SWISSPROT;Acc:Q96Q82]	-	-	-	28.5154	14.7133	1.93807	0.954623			92.3694	14.7133	6.27796	2.6503	**		92.3694	28.5154	3.23928	1.69567	*		92.3694	269.303	0.342994	-1.54375		*
DEK	Protein DEK. [Source:Uniprot/SWISSPROT;Acc:P35659]	GO:0006357-regulation of transcription from RNA polymerase II promoter;GO:0007165-signal transduction;GO:0019079-viral genome replication	GO:0003677-DNA binding;GO:0003704-specific RNA polymerase II transcription factor activity;GO:0042393-histone binding	GO:0005634-nucleus	6.66692	2.8523	2.33738	1.22489	*		21.5643	2.8523	7.5603	2.91844	**		21.5643	6.66692	3.23452	1.69355	*		21.5643	485.862	0.0443836	-4.49383		***
Q8WVB2_HUMAN	FAM128A protein (Hypothetical protein tmp_locus_22). [Source:Uniprot/SPTREMBL;Acc:Q8WVB2]	-	-	-	136.591	83.7073	1.63177	0.70644			441.473	83.7073	5.27402	2.3989	**		441.473	136.591	3.23208	1.69246	*		441.473	64.0525	6.89237	2.785	**
RS20_HUMAN	40S ribosomal protein S20. [Source:Uniprot/SWISSPROT;Acc:P60866]	GO:0006412-translation	GO:0003723-RNA binding;GO:0003735-structural constituent of ribosome;GO:0005515-protein binding	GO:0005622-intracellular;GO:0005843-cytosolic small ribosomal subunit (sensu Eukaryota)	7.14136	3.19163	2.23753	1.16191	*		23.0579	3.19163	7.22449	2.85289	**		23.0579	7.14136	3.22878	1.69099	*		23.0579	3926.12	0.00587295	-7.4117		***
RNASEH1	Ribonuclease H1 (EC 3.1.26.4) (RNase H1) (Ribonuclease H type II). [Source:Uniprot/SWISSPROT;Acc:O60930]	GO:0006401-RNA catabolic process	GO:0000287-magnesium ion binding;GO:0003723-RNA binding;GO:0004519-endonuclease activity;GO:0004523-ribonuclease H activity;GO:0004540-ribonuclease activity;GO:0016787-hydrolase activity	GO:0005739-mitochondrion	6.92604	2.73053	2.53652	1.34285	*		22.3306	2.73053	8.17811	3.03177	***		22.3306	6.92604	3.22415	1.68892	*		22.3306	97.4296	0.229197	-2.12534		**
XP_371757.2	-	GO:0006412-translation	GO:0003735-structural constituent of ribosome;GO:0030528-transcription regulator activity	GO:0005622-intracellular;GO:0015934-large ribosomal subunit	8.68196	5.257	1.65151	0.723781			27.9243	5.257	5.31184	2.40921	**		27.9243	8.68196	3.21636	1.68543	*		27.9243	7032.27	0.00397088	-7.97632		***
PAIRB_HUMAN	Plasminogen activator inhibitor 1 RNA-binding protein (PAI1 RNA- binding protein 1) (PAI-RBP1) (SERPINE1 mRNA-binding protein 1). [Source:Uniprot/SWISSPROT;Acc:Q8NC51]	GO:0043488-regulation of mRNA stability	GO:0003723-RNA binding;GO:0003730-mRNA 3'-UTR binding;GO:0005515-protein binding	GO:0005634-nucleus	17.1648	2.47989	6.92162	2.79111	**		55.1663	2.47989	22.2455	4.47544	***		55.1663	17.1648	3.21391	1.68433	*		55.1663	819.587	0.0673099	-3.89304		***
COX6C	Cytochrome c oxidase polypeptide VIc precursor (EC 1.9.3.1). [Source:Uniprot/SWISSPROT;Acc:P09669]	GO:0006118-electron transport	GO:0004129-cytochrome-c oxidase activity;GO:0016491-oxidoreductase activity	GO:0005739-mitochondrion;GO:0016020-membrane;GO:0016021-integral to membrane	225.822	55.7304	4.05205	2.01865	**		725.149	55.7304	13.0117	3.70174	***		725.149	225.822	3.21115	1.68309	*		725.149	2429.46	0.298481	-1.74429		*
XP_372926.2	-	-	-	-	22.1774	2.80669	7.90162	2.98215	**		71.1699	2.80669	25.3573	4.66433	***		71.1699	22.1774	3.20912	1.68218	*		71.1699	2159.06	0.0329634	-4.92299		***
RS16_HUMAN	40S ribosomal protein S16. [Source:Uniprot/SWISSPROT;Acc:P62249]	GO:0006412-translation	GO:0003735-structural constituent of ribosome;GO:0005515-protein binding	GO:0005622-intracellular;GO:0005840-ribosome;GO:0005843-cytosolic small ribosomal subunit (sensu Eukaryota)	5043.19	3167.49	1.59217	0.670995			16171.5	3167.49	5.10545	2.35204	**		16171.5	5043.19	3.2066	1.68104	*		16171.5	19694	0.821136	-0.284308
-	-	-	-	-	135.715	15.4922	8.76017	3.13096	***		434.79	15.4922	28.065	4.8107	***		434.79	135.715	3.20371	1.67974	*		434.79	3247.92	0.133867	-2.90113		**
RS28_HUMAN	ribosomal protein S28 (RPS28), mRNA [Source:RefSeq_dna;Acc:NM_001031]	-	-	-	139.823	9.60331	14.5599	3.86392	***		447.651	9.60331	46.6142	5.5427	***		447.651	139.823	3.20156	1.67877	*		447.651	3435.22	0.130312	-2.93995		**
Q5T776_HUMAN	-	-	-	-	31.4426	3.56866	8.81074	3.13926	***		100.608	3.56866	28.1921	4.81722	***		100.608	31.4426	3.19974	1.67795	*		100.608	805.707	0.124869	-3.00151		***
XP_060535.1	-	GO:0006412-translation	GO:0003735-structural constituent of ribosome	GO:0005622-intracellular;GO:0005840-ribosome	219.588	54.6471	4.0183	2.00658	**		701.434	54.6471	12.8357	3.68209	***		701.434	219.588	3.19432	1.67551	*		701.434	700.941	1.0007	0.00101465
TM4SF1	Transmembrane 4 L6 family member 1 (Tumor-associated antigen L6) (Membrane component surface marker 1) (M3S1). [Source:Uniprot/SWISSPROT;Acc:P30408]	GO:0008150-biological_process	GO:0003674-molecular_function	GO:0005887-integral to plasma membrane;GO:0016020-membrane;GO:0016021-integral to membrane	1847.43	1594.22	1.15883	0.212671			5879.65	1594.22	3.68811	1.88288	*		5879.65	1847.43	3.18261	1.67021	*		5879.65	9576.03	0.613997	-0.703698
GAPD	-	GO:0006006-glucose metabolic process;GO:0006096-glycolysis	GO:0004365-glyceraldehyde-3-phosphate dehydrogenase (phosphorylating) activity;GO:0005515-protein binding;GO:0016491-oxidoreductase activity;GO:0051287-NAD binding	GO:0005737-cytoplasm	3336.13	3039.53	1.09758	0.134325			10605.8	3039.53	3.48928	1.80293	*		10605.8	3336.13	3.17907	1.6686	*		10605.8	10255.1	1.03419	0.0485054
CHURC1	Churchill protein. [Source:Uniprot/SWISSPROT;Acc:Q8WUH1]	GO:0006350-transcription;GO:0006355-regulation of transcription, DNA-dependent;GO:0007275-multicellular organismal development;GO:0045941-positive regulation of transcription	GO:0008270-zinc ion binding;GO:0016563-transcriptional activator activity	-	6.44746	3.89942	1.65344	0.725472			20.4609	3.89942	5.24716	2.39154	**		20.4609	6.44746	3.17348	1.66607	*		20.4609	297.375	0.0688049	-3.86134		***
CTXN1_HUMAN	Cortexin-1. [Source:Uniprot/SWISSPROT;Acc:P60606]	-	-	GO:0016020-membrane;GO:0016021-integral to membrane	135.353	71.4728	1.89378	0.921265			428.176	71.4728	5.99076	2.58274	**		428.176	135.353	3.16339	1.66147	*		428.176	78.8845	5.42789	2.44039	**
DNAJC14	Nuclear protein Hcc-1 (Proliferation-associated cytokine-inducible protein CIP29) (Cytokine-induced protein of 29 kDa). [Source:Uniprot/SWISSPROT;Acc:P82979]	GO:0006350-transcription;GO:0006355-regulation of transcription, DNA-dependent;GO:0006417-regulation of translation	GO:0003677-DNA binding;GO:0005515-protein binding	GO:0005634-nucleus	18.9867	3.13843	6.04973	2.59687	**		59.9944	3.13843	19.116	4.25671	***		59.9944	18.9867	3.15982	1.65984	*		59.9944	241.519	0.248404	-2.00924		**
RPL6	60S ribosomal protein L6 (TAX-responsive enhancer element-binding protein 107) (TAXREB107) (Neoplasm-related protein C140). [Source:Uniprot/SWISSPROT;Acc:Q02878]	-	-	-	967.916	167.051	5.79412	2.53459	**		3051.13	167.051	18.2646	4.19098	***		3051.13	967.916	3.15226	1.65639	*		3051.13	18465.1	0.165237	-2.59739		**
HLA-H	HLA class I histocompatibility antigen, alpha chain G precursor (HLA G antigen). [Source:Uniprot/SWISSPROT;Acc:P17693]	GO:0002474-antigen processing and presentation of peptide antigen via MHC class I;GO:0006955-immune response;GO:0019882-antigen processing and presentation	GO:0005515-protein binding;GO:0032393-MHC class I receptor activity	GO:0005887-integral to plasma membrane;GO:0016020-membrane;GO:0016021-integral to membrane;GO:0042612-MHC class I protein complex	54.3236	6.2956	8.62882	3.10916	***		171.24	6.2956	27.1999	4.76553	***		171.24	54.3236	3.15221	1.65636	*		171.24	1665.34	0.102825	-3.28173		***
NP_803880.1	Monoamine-sulfating phenol sulfotransferase (EC 2.8.2.1) (Aryl sulfotransferase 1A3) (Sulfotransferase, monoamine-preferring) (M-PST) (Thermolabile phenol sulfotransferase) (TL-PST) (Placental estrogen sulfotransferase) (Catecholamine-sulfating phenol sul [Source:Uniprot/SWISSPROT;Acc:P50224]	-	-	-	11.7131	4.06435	2.8819	1.52702	*		36.8861	4.06435	9.07553	3.18198	***		36.8861	11.7131	3.14915	1.65496	*		36.8861	402.136	0.0917255	-3.44653		***
NP_569736.1	Jun dimerization protein [Source:RefSeq_peptide;Acc:NP_569736]	GO:0006355-regulation of transcription, DNA-dependent	GO:0003700-transcription factor activity;GO:0043565-sequence-specific DNA binding;GO:0046983-protein dimerization activity	GO:0005634-nucleus	107.773	115.622	0.93212	-0.101412			339.333	115.622	2.93486	1.55329	*		339.333	107.773	3.14858	1.6547	*		339.333	124.179	2.73261	1.45028	*
MRPL42	Mitochondrial 28S ribosomal protein S32, mitochondrial precursor (S32mt) (MRP-S32). [Source:Uniprot/SWISSPROT;Acc:Q9Y6G3]	GO:0006412-translation	GO:0003735-structural constituent of ribosome	GO:0005739-mitochondrion;GO:0005763-mitochondrial small ribosomal subunit;GO:0030529-ribonucleoprotein complex	10.6359	4.29851	2.47433	1.30704	*		33.476	4.29851	7.78783	2.96122	**		33.476	10.6359	3.14745	1.65418	*		33.476	130.341	0.256835	-1.96109		*
USMG5	Up-regulated during skeletal muscle growth protein 5 (HCV F- transactivated protein 2). [Source:Uniprot/SWISSPROT;Acc:Q96IX5]	-	-	GO:0016020-membrane;GO:0016021-integral to membrane	118.882	19.1812	6.19785	2.63177	**		373.238	19.1812	19.4585	4.28233	***		373.238	118.882	3.13956	1.65056	*		373.238	1957.93	0.190629	-2.39116		**
PWP1_HUMAN	Periodic tryptophan protein 1 homolog (Keratinocyte protein IEF SSP 9502). [Source:Uniprot/SWISSPROT;Acc:Q13610]	GO:0006350-transcription	-	GO:0005634-nucleus	8.37663	5.64212	1.48466	0.570131			26.2819	5.64212	4.65816	2.21976	**		26.2819	8.37663	3.13753	1.64963	*		26.2819	256.114	0.102618	-3.28464		***
PRS4_HUMAN	26S protease regulatory subunit 4 (P26s4) (Proteasome 26S subunit ATPase 1). [Source:Uniprot/SWISSPROT;Acc:P62191]	GO:0030163-protein catabolic process	GO:0000166-nucleotide binding;GO:0005515-protein binding;GO:0005524-ATP binding;GO:0016787-hydrolase activity;GO:0016887-ATPase activity	GO:0000502-proteasome complex (sensu Eukaryota);GO:0005634-nucleus;GO:0005737-cytoplasm;GO:0005829-cytosol	9.1412	2.18228	4.18884	2.06655	**		28.6363	2.18228	13.1222	3.71394	***		28.6363	9.1412	3.13266	1.64739	*		28.6363	446.358	0.0641555	-3.96228		***
CLNS1A	Methylosome subunit pICln (Chloride conductance regulatory protein ICln) (I(Cln)) (Chloride channel, nucleotide sensitive 1A) (Chloride ion current inducer protein) (ClCI) (Reticulocyte pICln). [Source:Uniprot/SWISSPROT;Acc:P54105]	GO:0006810-transport;GO:0006821-chloride transport;GO:0006884-regulation of cell volume;GO:0007601-visual perception;GO:0008015-circulation	GO:0015457-auxiliary transport protein activity	GO:0005634-nucleus;GO:0005886-plasma membrane	53.0427	11.4574	4.62957	2.21088	**		165.644	11.4574	14.4574	3.85374	***		165.644	53.0427	3.12285	1.64286	*		165.644	479.892	0.34517	-1.53462		*
NP_277022.1	-	-	-	-	7.07344	2.29874	3.07709	1.62157	*		22.089	2.29874	9.60916	3.26441	***		22.089	7.07344	3.12281	1.64284	*		22.089	91.1199	0.242417	-2.04444		**
COX5A	Cytochrome c oxidase subunit 5A, mitochondrial precursor (EC 1.9.3.1) (Cytochrome c oxidase polypeptide Va). [Source:Uniprot/SWISSPROT;Acc:P20674]	GO:0006118-electron transport	GO:0004129-cytochrome-c oxidase activity;GO:0005506-iron ion binding;GO:0009055-electron carrier activity;GO:0046872-metal ion binding	GO:0005739-mitochondrion;GO:0005743-mitochondrial inner membrane;GO:0016020-membrane	70.8249	17.8542	3.96684	1.98799	*		221.049	17.8542	12.3808	3.63003	***		221.049	70.8249	3.12106	1.64204	*		221.049	1130.22	0.195581	-2.35416		**
TUBB3	-	GO:0007018-microtubule-based movement;GO:0007165-signal transduction;GO:0007186-G-protein coupled receptor protein signaling pathway;GO:0051258-protein polymerization	GO:0000166-nucleotide binding;GO:0001584-rhodopsin-like receptor activity;GO:0003924-GTPase activity;GO:0004872-receptor activity;GO:0004980-melanocyte stimulating hormone receptor activity;GO:0005198-structural molecule activity;GO:0005200-structural constituent of cytoskeleton;GO:0005525-GTP binding	GO:0005737-cytoplasm;GO:0005856-cytoskeleton;GO:0005874-microtubule;GO:0016020-membrane;GO:0016021-integral to membrane;GO:0043234-protein complex	42.9683	12.1287	3.54271	1.82485	*		134.027	12.1287	11.0504	3.46603	***		134.027	42.9683	3.1192	1.64117	*		134.027	31.8454	4.20867	2.07336	**
MYL6_HUMAN	Myosin light polypeptide 6 (Smooth muscle and nonmuscle myosin light chain alkali 6) (Myosin light chain alkali 3) (Myosin light chain 3) (MLC-3) (LC17). [Source:Uniprot/SWISSPROT;Acc:P60660]	GO:0007519-striated muscle development;GO:0030049-muscle filament sliding	GO:0003774-motor activity;GO:0005509-calcium ion binding;GO:0008307-structural constituent of muscle	GO:0016461-unconventional myosin complex	4698.48	4400.71	1.06766	0.0944588			14626	4400.71	3.32357	1.73273	*		14626	4698.48	3.11293	1.63827	*		14626	11233.1	1.30205	0.380785
EIF3S5	Eukaryotic translation initiation factor 3 subunit 5 (eIF-3 epsilon) (eIF3 p47 subunit) (eIF3f). [Source:Uniprot/SWISSPROT;Acc:O00303]	GO:0006412-translation;GO:0006446-regulation of translational initiation	GO:0003743-translation initiation factor activity;GO:0005515-protein binding	GO:0005852-eukaryotic translation initiation factor 3 complex	112.108	21.842	5.13267	2.35971	**		348.23	21.842	15.9431	3.99486	***		348.23	112.108	3.10621	1.63515	*		348.23	1107.14	0.314531	-1.66873		*
WHSC1L1	Histone-lysine N-methyltransferase NSD3 (EC 2.1.1.43) (Nuclear SET domain-containing protein 3) (WHSC1-like protein 1) (Wolf-Hirschhorn syndrome candidate 1-like protein 1) (Whistle) (WHSC1-like 1 isoform 9 with methyltransferase activity to lysine). [Source:Uniprot/SWISSPROT;Acc:Q9BZ95]	GO:0006350-transcription;GO:0006355-regulation of transcription, DNA-dependent;GO:0016049-cell growth;GO:0016568-chromatin modification;GO:0016571-histone methylation;GO:0030154-cell differentiation	GO:0005515-protein binding;GO:0008168-methyltransferase activity;GO:0008270-zinc ion binding;GO:0016740-transferase activity;GO:0018024-histone-lysine N-methyltransferase activity;GO:0046872-metal ion binding	GO:0005634-nucleus	13.7015	2.994	4.57631	2.19419	**		42.5381	2.994	14.2078	3.82861	***		42.5381	13.7015	3.10463	1.63442	*		42.5381	105.738	0.402299	-1.31366		*
Q8TEL4_HUMAN	Protein FAM102A. [Source:Uniprot/SWISSPROT;Acc:Q5T9C2]	-	-	-	21.8166	3.67026	5.94415	2.57147	**		67.7269	3.67026	18.4529	4.20577	***		67.7269	21.8166	3.10438	1.6343	*		67.7269	85.1247	0.79562	-0.329848
NP_116164.2	Kelch-like protein 22. [Source:Uniprot/SWISSPROT;Acc:Q53GT1]	-	GO:0005515-protein binding	-	35.7873	20.1247	1.77828	0.830482			110.999	20.1247	5.51556	2.46351	**		110.999	35.7873	3.10163	1.63303	*		110.999	35.7623	3.1038	1.63403	*
TM9S3_HUMAN	Transmembrane 9 superfamily protein member 3 precursor (SM-11044- binding protein) (EP70-P-iso). [Source:Uniprot/SWISSPROT;Acc:Q9HD45]	-	GO:0005488-binding	GO:0016020-membrane;GO:0016021-integral to membrane	151.849	166.03	0.91459	-0.128802			470.3	166.03	2.83262	1.50214	*		470.3	151.849	3.09715	1.63094	*		470.3	795.595	0.59113	-0.758454
C14orf156	SRA stem-loop-interacting RNA-binding protein, mitochondrial precursor. [Source:Uniprot/SWISSPROT;Acc:Q9GZT3]	GO:0006350-transcription;GO:0006355-regulation of transcription, DNA-dependent	GO:0000166-nucleotide binding;GO:0003723-RNA binding	GO:0005634-nucleus;GO:0005739-mitochondrion	10.2305	1.95429	5.23491	2.38816	**		31.6741	1.95429	16.2075	4.01859	***		31.6741	10.2305	3.09604	1.63042	*		31.6741	464.898	0.0681313	-3.87554		***
TPBG	Trophoblast glycoprotein precursor (5T4 oncofetal trophoblast glycoprotein) (5T4 oncotrophoblast glycoprotein) (5T4 oncofetal antigen) (M6P1). [Source:Uniprot/SWISSPROT;Acc:Q13641]	GO:0006928-cell motility;GO:0007155-cell adhesion	GO:0005515-protein binding	GO:0005887-integral to plasma membrane;GO:0016020-membrane	15.8386	2.60888	6.07104	2.60194	**		48.9646	2.60888	18.7684	4.23024	***		48.9646	15.8386	3.09147	1.62829	*		48.9646	257.638	0.190052	-2.39553		**
MT1F	Metallothionein-1H (MT-1H) (Metallothionein-IH) (MT-IH) (Metallothionein-0) (MT-0). [Source:Uniprot/SWISSPROT;Acc:P80294]	-	GO:0005507-copper ion binding;GO:0005515-protein binding;GO:0008270-zinc ion binding;GO:0046870-cadmium ion binding;GO:0046872-metal ion binding	-	130.298	142.524	0.914212	-0.129399			402.101	142.524	2.82128	1.49635	*		402.101	130.298	3.08602	1.62575	*		402.101	425.977	0.94395	-0.0832183
-	-	-	-	-	20.9474	4.6693	4.48618	2.16549	**		64.5535	4.6693	13.8251	3.78922	***		64.5535	20.9474	3.0817	1.62373	*		64.5535	526.192	0.12268	-3.02702		***
MT1E	Metallothionein-1E (MT-1E) (Metallothionein-IE) (MT-IE). [Source:Uniprot/SWISSPROT;Acc:P04732]	GO:0008150-biological_process	GO:0005507-copper ion binding;GO:0008270-zinc ion binding;GO:0046870-cadmium ion binding;GO:0046872-metal ion binding	GO:0005737-cytoplasm	616.603	538.86	1.14427	0.194432			1898.16	538.86	3.52255	1.81662	*		1898.16	616.603	3.07841	1.62219	*		1898.16	2602.43	0.72938	-0.455258
NP_079305.2	family with sequence similarity 128, member B (FAM128B), mRNA [Source:RefSeq_dna;Acc:NM_025029]	-	-	-	204.353	113.185	1.80548	0.852386			628.291	113.185	5.55102	2.47275	**		628.291	204.353	3.07453	1.62037	*		628.291	131.975	4.76068	2.25117	**
ID1	DNA-binding protein inhibitor ID-1 (Inhibitor of DNA binding 1). [Source:Uniprot/SWISSPROT;Acc:P41134]	GO:0000122-negative regulation of transcription from RNA polymerase II promoter;GO:0007275-multicellular organismal development;GO:0007507-heart development;GO:0016481-negative regulation of transcription;GO:0030509-BMP signaling pathway;GO:0043433-negative regulation of transcription factor activity;GO:0045765-regulation of angiogenesis	GO:0005515-protein binding;GO:0016564-transcriptional repressor activity	GO:0005634-nucleus	50.2404	18.6721	2.69066	1.42796	*		154.465	18.6721	8.2725	3.04832	***		154.465	50.2404	3.07452	1.62036	*		154.465	71.9015	2.14829	1.10319	*
C6orf72	Uncharacterized protein C6orf72 precursor. [Source:Uniprot/SWISSPROT;Acc:Q9NU53]	-	-	GO:0016020-membrane;GO:0016021-integral to membrane	12.6567	5.78026	2.18965	1.1307	*		38.9033	5.78026	6.73038	2.75069	**		38.9033	12.6567	3.07373	1.61999	*		38.9033	108.506	0.358536	-1.47981		*
-	-	-	-	-	620.166	188.873	3.2835	1.71523	*		1898.13	188.873	10.0497	3.32908	***		1898.13	620.166	3.06068	1.61385	*		1898.13	1337.37	1.4193	0.505179
XP_371160.1	-	-	-	-	39.4136	10.856	3.63057	1.8602	*		120.254	10.856	11.0772	3.46952	***		120.254	39.4136	3.05109	1.60932	*		120.254	2159.06	0.0556975	-4.16624		***
EMSY_HUMAN	Protein EMSY. [Source:Uniprot/SWISSPROT;Acc:Q7Z589]	GO:0006281-DNA repair;GO:0006350-transcription;GO:0006355-regulation of transcription, DNA-dependent;GO:0016568-chromatin modification	-	GO:0005634-nucleus	9.31675	4.9771	1.87192	0.904521			28.2964	4.9771	5.68532	2.50724	**		28.2964	9.31675	3.03715	1.60272	*		28.2964	28.7629	0.983783	-0.0235883
NP_612372.1	Coiled-coil domain-containing protein 45. [Source:Uniprot/SWISSPROT;Acc:Q96GE4]	-	GO:0005515-protein binding	-	9.42633	3.95133	2.38561	1.25436	*		28.5679	3.95133	7.22995	2.85399	**		28.5679	9.42633	3.03065	1.59963	*		28.5679	155.917	0.183225	-2.44831		**
CD99	CD99 antigen precursor (T-cell surface glycoprotein E2) (E2 antigen) (Protein MIC2) (12E7). [Source:Uniprot/SWISSPROT;Acc:P14209]	GO:0007155-cell adhesion	GO:0005515-protein binding	GO:0005737-cytoplasm;GO:0005886-plasma membrane;GO:0005887-integral to plasma membrane	205.592	158.104	1.30036	0.378909			622.699	158.104	3.93854	1.97766	*		622.699	205.592	3.02881	1.59875	*		622.699	388.145	1.6043	0.68194
SAP18	Histone deacetylase complex subunit SAP18 (Sin3-associated polypeptide, 18 kDa) (Sin3-associated polypeptide p18) (2HOR0202). [Source:Uniprot/SWISSPROT;Acc:O00422]	GO:0006350-transcription;GO:0006357-regulation of transcription from RNA polymerase II promoter	GO:0003714-transcription corepressor activity;GO:0005515-protein binding	GO:0000118-histone deacetylase complex	27.2308	13.4897	2.01864	1.01338	*		82.4668	13.4897	6.11331	2.61195	**		82.4668	27.2308	3.02844	1.59857	*		82.4668	756.199	0.109054	-3.19688		***
CENPJ	Centromere protein J (CENP-J) (Centrosomal P4.1-associated protein) (LAG-3-associated protein) (LYST-interacting protein 1). [Source:Uniprot/SWISSPROT;Acc:Q9HC77]	GO:0007020-microtubule nucleation;GO:0046785-microtubule polymerization;GO:0051301-cell division	GO:0005515-protein binding;GO:0015631-tubulin binding	GO:0005856-cytoskeleton;GO:0005874-microtubule;GO:0008275-gamma-tubulin small complex	7.60566	2.41644	3.14747	1.65419	*		23.0083	2.41644	9.52157	3.2512	***		23.0083	7.60566	3.02515	1.59701	*		23.0083	73.7932	0.311794	-1.68134		*
C1orf27	Putative LAG1-interacting protein (Fragment). [Source:Uniprot/SPTREMBL;Acc:Q8WYB6]	-	GO:0008270-zinc ion binding;GO:0016491-oxidoreductase activity	-	19.7479	10.7458	1.83773	0.877928			59.6105	10.7458	5.54733	2.47179	**		59.6105	19.7479	3.01857	1.59387	*		59.6105	193.801	0.307586	-1.70094		*
UBE2E1	Ubiquitin-conjugating enzyme E2 E1 (EC 6.3.2.19) (Ubiquitin-protein ligase E1) (Ubiquitin carrier protein E1) (UbcH6). [Source:Uniprot/SWISSPROT;Acc:P51965]	GO:0006464-protein modification;GO:0006511-ubiquitin-dependent protein catabolic process;GO:0006512-ubiquitin cycle;GO:0032020-ISG15-protein conjugation	GO:0004842-ubiquitin-protein ligase activity;GO:0005515-protein binding;GO:0016874-ligase activity;GO:0042296-ISG15 conjugating enzyme activity	-	100.472	36.6042	2.74483	1.45672	*		302.7	36.6042	8.26954	3.04781	***		302.7	100.472	3.01277	1.59109	*		302.7	556.3	0.544132	-0.877972
SMD2_HUMAN	Small nuclear ribonucleoprotein Sm D2 (snRNP core protein D2) (Sm-D2). [Source:Uniprot/SWISSPROT;Acc:P62316]	GO:0000245-spliceosome assembly;GO:0006397-mRNA processing;GO:0008380-RNA splicing	GO:0005515-protein binding	GO:0005634-nucleus;GO:0005681-spliceosome;GO:0030532-small nuclear ribonucleoprotein complex	545.203	412.877	1.3205	0.40108			1641.03	412.877	3.97461	1.99081	*		1641.03	545.203	3.00994	1.58973	*		1641.03	2570.49	0.638409	-0.647447
C20orf116	Uncharacterized protein C20orf116 precursor. [Source:Uniprot/SWISSPROT;Acc:Q96HY6]	-	GO:0005515-protein binding	-	34.5965	15.0399	2.30031	1.20183	*		103.851	15.0399	6.90504	2.78765	**		103.851	34.5965	3.00178	1.58582	*		103.851	67.3354	1.5423	0.625079
MESDC2	Mesoderm development candidate 2 (Renal carcinoma antigen NY-REN-61). [Source:Uniprot/SWISSPROT;Acc:Q14696]	GO:0007498-mesoderm development	GO:0003674-molecular_function	GO:0005575-cellular_component	11.381	3.86276	2.94635	1.55893	*		34.16	3.86276	8.8434	3.1446	***		34.16	11.381	3.00148	1.58567	*		34.16	313.972	0.108799	-3.20026		***
CTSL	Cathepsin L precursor (EC 3.4.22.15) (Major excreted protein) (MEP) [Contains: Cathepsin L heavy chain; Cathepsin L light chain]. [Source:Uniprot/SWISSPROT;Acc:P07711]	GO:0006508-proteolysis	GO:0004197-cysteine-type endopeptidase activity;GO:0004217-cathepsin L activity	GO:0005576-extracellular region;GO:0005764-lysosome	30.8112	16.0659	1.9178	0.939449			92.4637	16.0659	5.75527	2.52488	**		92.4637	30.8112	3.00098	1.58543	*		92.4637	945.026	0.0978425	-3.35339		***
RPS10	40S ribosomal protein S10. [Source:Uniprot/SWISSPROT;Acc:P46783]	GO:0006412-translation	GO:0003723-RNA binding;GO:0003735-structural constituent of ribosome	GO:0005843-cytosolic small ribosomal subunit (sensu Eukaryota);GO:0030529-ribonucleoprotein complex	2888.89	1255.92	2.30023	1.20178	*		8660.74	1255.92	6.89595	2.78575	**		8660.74	2888.89	2.99794	1.58397	*		8660.74	19368.6	0.447154	-1.16116		*
-	Ribosomal protein L21 variant (Fragment). [Source:Uniprot/SPTREMBL;Acc:Q59GK9]	-	-	-	1102.36	226.161	4.87423	2.28518	**		3301.93	226.161	14.5999	3.86789	***		3301.93	1102.36	2.99533	1.58271	*		3301.93	10946.4	0.301646	-1.72907		*
FNDC3_HUMAN	Fibronectin type-III domain-containing protein 3a. [Source:Uniprot/SWISSPROT;Acc:Q9Y2H6]	-	-	GO:0016020-membrane	7.15034	2.31145	3.09344	1.62921	*		21.3289	2.31145	9.22748	3.20594	***		21.3289	7.15034	2.98292	1.57672	*		21.3289	296.56	0.0719209	-3.79744		***
BTF3	Transcription factor BTF3 (RNA polymerase B transcription factor 3). [Source:Uniprot/SWISSPROT;Acc:P20290]	GO:0006350-transcription;GO:0006355-regulation of transcription, DNA-dependent;GO:0006366-transcription from RNA polymerase II promoter	GO:0003702-RNA polymerase II transcription factor activity	GO:0005634-nucleus	197.741	44.7423	4.41955	2.1439	**		589.351	44.7423	13.1721	3.71942	***		589.351	197.741	2.98042	1.57552	*		589.351	2353.55	0.250409	-1.99764		*
RL19_HUMAN	60S ribosomal protein L19. [Source:Uniprot/SWISSPROT;Acc:P84098]	GO:0006412-translation	GO:0003723-RNA binding;GO:0003735-structural constituent of ribosome	GO:0005622-intracellular;GO:0005840-ribosome;GO:0005842-cytosolic large ribosomal subunit (sensu Eukaryota)	113.04	9.52092	11.8728	3.56958	***		336.522	9.52092	35.3455	5.14346	***		336.522	113.04	2.97703	1.57387	*		336.522	5627.44	0.0598002	-4.06371		***
IMMT	Mitochondrial inner membrane protein (Mitofilin) (p87/89) (Proliferation-inducing gene 4 protein). [Source:Uniprot/SWISSPROT;Acc:Q16891]	GO:0008150-biological_process	GO:0003674-molecular_function;GO:0005515-protein binding	GO:0005739-mitochondrion;GO:0005743-mitochondrial inner membrane;GO:0016020-membrane;GO:0016021-integral to membrane	9.41368	4.83669	1.94631	0.960739			27.8301	4.83669	5.75395	2.52455	**		27.8301	9.41368	2.95634	1.56381	*		27.8301	335.768	0.0828847	-3.59275		***
HINT2	Histidine triad nucleotide-binding protein 2 (EC 3.-.-.-) (HINT-2) (HINT-3) (HIT-17kDa) (PKCI-1-related HIT protein). [Source:Uniprot/SWISSPROT;Acc:Q9BX68]	-	GO:0016787-hydrolase activity	GO:0005739-mitochondrion	21.7031	3.03962	7.14008	2.83594	**		64.1359	3.03962	21.1	4.39917	***		64.1359	21.7031	2.95515	1.56323	*		64.1359	147.136	0.435894	-1.19795		*
PRS8_HUMAN	26S protease regulatory subunit 8 (Proteasome 26S subunit ATPase 5) (Proteasome subunit p45) (p45/SUG) (Thyroid hormone receptor- interacting protein 1) (TRIP1). [Source:Uniprot/SWISSPROT;Acc:P62195]	GO:0006366-transcription from RNA polymerase II promoter;GO:0016481-negative regulation of transcription;GO:0030163-protein catabolic process;GO:0043069-negative regulation of programmed cell death;GO:0043161-proteasomal ubiquitin-dependent protein catabolic process;GO:0043193-positive regulation of gene-specific transcription	GO:0000166-nucleotide binding;GO:0003712-transcription cofactor activity;GO:0005102-receptor binding;GO:0005524-ATP binding;GO:0016787-hydrolase activity;GO:0016887-ATPase activity;GO:0031531-thyrotropin-releasing hormone receptor binding	GO:0000502-proteasome complex (sensu Eukaryota);GO:0005634-nucleus;GO:0005737-cytoplasm;GO:0005829-cytosol	49.8866	8.53447	5.84531	2.54728	**		147.191	8.53447	17.2467	4.10825	***		147.191	49.8866	2.95051	1.56097	*		147.191	1113.46	0.132192	-2.91929		**
PDIP2_HUMAN	Polymerase delta-interacting protein 2 (38 kDa DNA polymerase delta interaction protein) (p38). [Source:Uniprot/SWISSPROT;Acc:Q9Y2S7]	-	-	GO:0005634-nucleus;GO:0005739-mitochondrion	19.0759	5.01271	3.8055	1.92809	*		56.2685	5.01271	11.2252	3.48866	***		56.2685	19.0759	2.94972	1.56058	*		56.2685	79.5218	0.707586	-0.499023
RPL3	60S ribosomal protein L3 (HIV-1 TAR RNA-binding protein B) (TARBP-B). [Source:Uniprot/SWISSPROT;Acc:P39023]	GO:0006412-translation	GO:0003723-RNA binding;GO:0003735-structural constituent of ribosome;GO:0005515-protein binding	GO:0005622-intracellular;GO:0005730-nucleolus;GO:0005840-ribosome;GO:0005842-cytosolic large ribosomal subunit (sensu Eukaryota)	4530.14	5170.29	0.876187	-0.190689			13332.7	5170.29	2.57872	1.36665	*		13332.7	4530.14	2.94311	1.55734	*		13332.7	13224	1.00822	0.0118121
C10orf86	Uncharacterized protein C10orf86. [Source:Uniprot/SWISSPROT;Acc:Q9NXX6]	-	-	-	8.0081	4.22265	1.89646	0.92331			23.5625	4.22265	5.58002	2.48027	**		23.5625	8.0081	2.94233	1.55696	*		23.5625	249.026	0.0946186	-3.40173		***
DAPK2_HUMAN	Death-associated protein kinase 2 (EC 2.7.11.1) (DAP kinase 2) (DAP- kinase-related protein 1) (DRP-1). [Source:Uniprot/SWISSPROT;Acc:Q9UIK4]	GO:0006468-protein amino acid phosphorylation;GO:0006915-apoptosis;GO:0006917-induction of apoptosis;GO:0007243-protein kinase cascade	GO:0000166-nucleotide binding;GO:0004672-protein kinase activity;GO:0004685-calcium- and calmodulin-dependent protein kinase activity;GO:0005516-calmodulin binding;GO:0005524-ATP binding;GO:0016740-transferase activity;GO:0042802-identical protein binding	GO:0005737-cytoplasm	7.36437	3.64736	2.01909	1.01371	*		21.5867	3.64736	5.91845	2.56522	**		21.5867	7.36437	2.93124	1.55151	*		21.5867	33.591	0.642634	-0.63793
RPS4Y1	40S ribosomal protein S4, Y isoform 1. [Source:Uniprot/SWISSPROT;Acc:P22090]	GO:0006412-translation	GO:0003723-RNA binding;GO:0003735-structural constituent of ribosome;GO:0019843-rRNA binding	GO:0005622-intracellular;GO:0005840-ribosome;GO:0005843-cytosolic small ribosomal subunit (sensu Eukaryota)	550.106	328.002	1.67714	0.746002			1612.16	328.002	4.9151	2.29722	**		1612.16	550.106	2.93064	1.55122	*		1612.16	2673.4	0.603038	-0.729679
PSMD1	26S proteasome non-ATPase regulatory subunit 1 (26S proteasome regulatory subunit RPN2) (26S proteasome regulatory subunit S1) (26S proteasome subunit p112). [Source:Uniprot/SWISSPROT;Acc:Q99460]	GO:0000074-regulation of progression through cell cycle	GO:0005515-protein binding	GO:0005829-cytosol;GO:0005838-proteasome regulatory particle (sensu Eukaryota)	24.5628	8.64716	2.84056	1.50618	*		71.947	8.64716	8.32031	3.05664	***		71.947	24.5628	2.92911	1.55046	*		71.947	657.974	0.109346	-3.19302		***
NP_065682.2	Tumor necrosis factor receptor superfamily member 25 precursor (WSL-1 protein) (Apoptosis-mediating receptor DR3) (Apoptosis-mediating receptor TRAMP) (Death domain receptor 3) (WSL protein) (Apoptosis- inducing receptor AIR) (Apo-3) (Lymphocyte-associate [Source:Uniprot/SWISSPROT;Acc:Q93038]	GO:0035023-regulation of Rho protein signal transduction;GO:0043123-positive regulation of I-kappaB kinase/NF-kappaB cascade	GO:0004871-signal transducer activity;GO:0005085-guanyl-nucleotide exchange factor activity;GO:0005089-Rho guanyl-nucleotide exchange factor activity	GO:0005622-intracellular	19.6258	13.6182	1.44115	0.527217			57.3964	13.6182	4.21468	2.07542	**		57.3964	19.6258	2.92453	1.54821	*		57.3964	12.3442	4.64967	2.21713	**
Q96K47_HUMAN	coiled-coil domain containing 14 [Source:RefSeq_peptide;Acc:NP_073594]	-	-	-	32.1919	29.0984	1.10631	0.145759			93.849	29.0984	3.22523	1.6894	*		93.849	32.1919	2.9153	1.54364	*		93.849	158.339	0.592711	-0.7546
HIST1H2AK	Histone H2A type 1-J. [Source:Uniprot/SWISSPROT;Acc:Q99878]	-	-	-	7.8639	4.57229	1.7199	0.782329			22.8952	4.57229	5.00737	2.32405	**		22.8952	7.8639	2.91142	1.54172	*		22.8952	26.816	0.853786	-0.228053
-	Tubulin-specific chaperone A (Tubulin-folding cofactor A) (CFA) (TCP1- chaperonin cofactor A). [Source:Uniprot/SWISSPROT;Acc:O75347]	GO:0007023-post-chaperonin tubulin folding pathway;GO:0007025-beta-tubulin folding	GO:0051082-unfolded protein binding;GO:0051087-chaperone binding	GO:0005737-cytoplasm;GO:0005856-cytoskeleton;GO:0005874-microtubule	84.4522	7.48079	11.2892	3.49687	***		245.367	7.48079	32.7996	5.03561	***		245.367	84.4522	2.90539	1.53873	*		245.367	2293.4	0.106988	-3.22447		***
H2AFV	Histone H2AV (H2A.F/Z). [Source:Uniprot/SWISSPROT;Acc:Q71UI9]	GO:0006334-nucleosome assembly;GO:0007001-chromosome organization and biogenesis (sensu Eukaryota)	GO:0003677-DNA binding	GO:0000786-nucleosome;GO:0005634-nucleus;GO:0005694-chromosome	234.261	49.3183	4.74999	2.24792	**		680.433	49.3183	13.7968	3.78626	***		680.433	234.261	2.90459	1.53833	*		680.433	1051.7	0.646982	-0.628201
NP_149014.3	synapse defective 1, Rho GTPase, homolog 1 [Source:RefSeq_peptide;Acc:NP_149014]	GO:0007165-signal transduction	-	GO:0005622-intracellular	14.518	10.6799	1.35937	0.442935			41.9106	10.6799	3.92423	1.97241	*		41.9106	14.518	2.8868	1.52947	*		41.9106	40.1864	1.0429	0.0606068
VTI1B	Vesicle transport through interaction with t-SNAREs homolog 1B (Vesicle transport v-SNARE protein Vti1-like 1) (Vti1-rp1). [Source:Uniprot/SWISSPROT;Acc:Q9UEU0]	GO:0006886-intracellular protein transport;GO:0006904-vesicle docking during exocytosis;GO:0006944-membrane fusion;GO:0008283-cell proliferation;GO:0016192-vesicle-mediated transport	-	GO:0016020-membrane;GO:0016021-integral to membrane	34.5023	8.37745	4.11847	2.04211	**		99.3908	8.37745	11.8641	3.56853	***		99.3908	34.5023	2.8807	1.52642	*		99.3908	609.184	0.163154	-2.61569		**
ZFP36L1	Butyrate response factor 1 (TIS11B protein) (EGF-response factor 1) (ERF-1). [Source:Uniprot/SWISSPROT;Acc:Q07352]	GO:0001570-vasculogenesis;GO:0006417-regulation of translation;GO:0043488-regulation of mRNA stability	GO:0003700-transcription factor activity;GO:0003729-mRNA binding;GO:0005515-protein binding;GO:0008270-zinc ion binding;GO:0046872-metal ion binding	GO:0005634-nucleus;GO:0005737-cytoplasm	281.215	103.639	2.7134	1.4401	*		808.863	103.639	7.80461	2.96433	**		808.863	281.215	2.87632	1.52422	*		808.863	470.308	1.71986	0.78229
TPIS_HUMAN	Triosephosphate isomerase (EC 5.3.1.1) (TIM) (Triose-phosphate isomerase). [Source:Uniprot/SWISSPROT;Acc:P60174]	GO:0006094-gluconeogenesis;GO:0006096-glycolysis;GO:0006098-pentose-phosphate shunt;GO:0006633-fatty acid biosynthetic process;GO:0008152-metabolic process	GO:0004807-triose-phosphate isomerase activity;GO:0016853-isomerase activity	-	72.4572	16.3052	4.44381	2.1518	**		208.318	16.3052	12.7762	3.67538	***		208.318	72.4572	2.87505	1.52359	*		208.318	720.637	0.289075	-1.79049		*
NP_653212.1	cytochrome b5 domain containing 2 [Source:RefSeq_peptide;Acc:NP_653212]	-	-	-	9.01175	3.09153	2.91498	1.54349	*		25.8984	3.09153	8.37724	3.06647	***		25.8984	9.01175	2.87385	1.52299	*		25.8984	173.768	0.14904	-2.74623		**
CHCHD2	Coiled-coil-helix-coiled-coil-helix domain-containing protein 2 (HCV NS2 trans-regulated protein) (NS2TP). [Source:Uniprot/SWISSPROT;Acc:Q9Y6H1]	-	-	-	65.7943	6.81868	9.64913	3.2704	***		188.92	6.81868	27.7062	4.79214	***		188.92	65.7943	2.87137	1.52174	*		188.92	1960.71	0.0963527	-3.37553		***
BLOC1S2	Biogenesis of lysosome-related organelles complex-1 subunit 2 (BLOC subunit 2) (Centrosome-associated protein). [Source:Uniprot/SWISSPROT;Acc:Q6QNY1]	-	GO:0042802-identical protein binding	-	127.095	145.081	0.876031	-0.190947			364.286	145.081	2.51091	1.32821	*		364.286	127.095	2.86624	1.51916	*		364.286	866.855	0.420239	-1.25072		*
XP_496225.1	40S ribosomal protein S26. [Source:Uniprot/SWISSPROT;Acc:P62854]	GO:0006412-translation	GO:0003735-structural constituent of ribosome	GO:0005622-intracellular;GO:0005840-ribosome	552.583	475.733	1.16154	0.216041			1577.18	475.733	3.31526	1.72912	*		1577.18	552.583	2.85419	1.51308	*		1577.18	2246.21	0.702149	-0.51015
TYB10_HUMAN	Thymosin beta-10. [Source:Uniprot/SWISSPROT;Acc:P63313]	GO:0007010-cytoskeleton organization and biogenesis	GO:0003779-actin binding	GO:0005737-cytoplasm;GO:0005856-cytoskeleton	11.9693	3.62971	3.2976	1.72142	*		34.0056	3.62971	9.36868	3.22785	***		34.0056	11.9693	2.84106	1.50643	*		34.0056	442.66	0.076821	-3.70236		***
C9orf75	C9orf75 protein (Fragment). [Source:Uniprot/SPTREMBL;Acc:Q8IZ53]	-	-	-	85.3447	70.5913	1.209	0.273812			242.366	70.5913	3.43338	1.77963	*		242.366	85.3447	2.83985	1.50582	*		242.366	54.1012	4.47987	2.16346	**
-	-	-	-	-	252.34	38.4659	6.5601	2.71372	**		716.102	38.4659	18.6165	4.21851	***		716.102	252.34	2.83784	1.50479	*		716.102	6389.57	0.112074	-3.15748		***
RPL13A	60S ribosomal protein L13a (23 kDa highly basic protein). [Source:Uniprot/SWISSPROT;Acc:P40429]	GO:0006412-translation	GO:0003735-structural constituent of ribosome	GO:0005622-intracellular;GO:0015934-large ribosomal subunit	984.396	398.321	2.47136	1.30531	*		2793.04	398.321	7.01203	2.80983	**		2793.04	984.396	2.83731	1.50452	*		2793.04	7852.82	0.355673	-1.49137		*
HIST1H2BM	Histone H2B type 1-M (H2B.e) (H2B/e). [Source:Uniprot/SWISSPROT;Acc:Q99879]	GO:0006334-nucleosome assembly;GO:0007001-chromosome organization and biogenesis (sensu Eukaryota)	GO:0003677-DNA binding	GO:0000786-nucleosome;GO:0005634-nucleus;GO:0005694-chromosome	15.674	8.8372	1.77364	0.826712			44.3637	8.8372	5.02011	2.32772	**		44.3637	15.674	2.8304	1.50101	*		44.3637	40.9741	1.08273	0.114669
NP_060373.1	taurine upregulated gene 1 (TUG1) on chromosome 22 [Source:RefSeq_dna;Acc:NR_002323]	-	-	-	64.7533	19.4536	3.32861	1.73492	*		182.423	19.4536	9.37734	3.22918	***		182.423	64.7533	2.81719	1.49426	*		182.423	373.096	0.488943	-1.03226		*
PSMD2	26S proteasome non-ATPase regulatory subunit 2 (26S proteasome regulatory subunit RPN1) (26S proteasome regulatory subunit S2) (26S proteasome subunit p97) (Tumor necrosis factor type 1 receptor- associated protein 2) (55.11 protein). [Source:Uniprot/SWISSPROT;Acc:Q13200]	GO:0000074-regulation of progression through cell cycle	GO:0005515-protein binding	GO:0005829-cytosol;GO:0005838-proteasome regulatory particle (sensu Eukaryota)	180.287	104.27	1.72904	0.789969			507.669	104.27	4.86877	2.28356	**		507.669	180.287	2.81589	1.49359	*		507.669	1145.57	0.443158	-1.17411		*
XP_208185.1	-	-	-	-	90.0271	8.75098	10.2877	3.36284	***		253.441	8.75098	28.9615	4.85606	***		253.441	90.0271	2.81516	1.49322	*		253.441	3715.45	0.0682128	-3.87381		***
PPM1A	Protein phosphatase 2C isoform alpha (EC 3.1.3.16) (PP2C-alpha) (IA) (Protein phosphatase 1A). [Source:Uniprot/SWISSPROT;Acc:P35813]	GO:0006470-protein amino acid dephosphorylation;GO:0043123-positive regulation of I-kappaB kinase/NF-kappaB cascade	GO:0000287-magnesium ion binding;GO:0004871-signal transducer activity;GO:0005515-protein binding;GO:0015071-protein phosphatase type 2C activity;GO:0016787-hydrolase activity;GO:0030145-manganese ion binding	GO:0008287-protein serine/threonine phosphatase complex	26.978	8.35345	3.22956	1.69134	*		75.9256	8.35345	9.08913	3.18414	***		75.9256	26.978	2.81436	1.49281	*		75.9256	91.8568	0.826565	-0.274799
XP_371151.2	-	-	-	-	12.989	2.53932	5.11516	2.35478	**		36.55	2.53932	14.3936	3.84736	***		36.55	12.989	2.81392	1.49258	*		36.55	1373.76	0.0266058	-5.23212		***
NOSIP	eNOS interacting protein [Source:RefSeq_peptide;Acc:NP_057037]	GO:0016567-protein ubiquitination;GO:0043086-negative regulation of enzyme activity;GO:0051001-negative regulation of nitric-oxide synthase activity	GO:0004842-ubiquitin-protein ligase activity;GO:0005515-protein binding	GO:0000151-ubiquitin ligase complex;GO:0005634-nucleus;GO:0005737-cytoplasm	14.0899	15.9266	0.88468	-0.176772			39.5676	15.9266	2.48438	1.31288	*		39.5676	14.0899	2.80822	1.48966	*		39.5676	10.1651	3.8925	1.9607	*
SIGLEC8	Sialic acid-binding Ig-like lectin 8 precursor (Siglec-8) (Sialoadhesin family member 2) (SAF-2) (CD329 antigen) (CDw329). [Source:Uniprot/SWISSPROT;Acc:Q9NYZ4]	GO:0007155-cell adhesion;GO:0007165-signal transduction	GO:0004888-transmembrane receptor activity;GO:0005515-protein binding;GO:0005529-sugar binding	GO:0016020-membrane;GO:0016021-integral to membrane	47.344	36.2447	1.30623	0.38541			132.643	36.2447	3.65964	1.8717	*		132.643	47.344	2.80168	1.48629	*		132.643	569.103	0.233073	-2.10114		**
RL32_HUMAN	60S ribosomal protein L32. [Source:Uniprot/SWISSPROT;Acc:P62910]	GO:0006412-translation	GO:0003735-structural constituent of ribosome;GO:0005515-protein binding	GO:0005622-intracellular;GO:0005840-ribosome	3442.79	3183.93	1.0813	0.112769			9635.56	3183.93	3.02631	1.59756	*		9635.56	3442.79	2.79877	1.48479	*		9635.56	14786.8	0.651635	-0.617865
C10orf28	Growth inhibition and differentiation-related protein 88 (Putative mitochondrial space protein 32.1). [Source:Uniprot/SWISSPROT;Acc:Q7Z5L2]	-	-	-	10.4106	3.02931	3.43663	1.781	*		29.1165	3.02931	9.61161	3.26478	***		29.1165	10.4106	2.79681	1.48378	*		29.1165	76.8622	0.378815	-1.40044		*
-	-	GO:0006412-translation	GO:0003723-RNA binding;GO:0003735-structural constituent of ribosome;GO:0005515-protein binding	GO:0005622-intracellular;GO:0005730-nucleolus;GO:0005840-ribosome;GO:0005843-cytosolic small ribosomal subunit (sensu Eukaryota)	96.9105	4.82416	20.0886	4.3283	***		270.798	4.82416	56.1336	5.81079	***		270.798	96.9105	2.79431	1.48249	*		270.798	4358.55	0.0621302	-4.00856		***
RNF5	E3 ubiquitin-protein ligase RNF5 (EC 6.3.2.-) (HsRma1) (RING finger protein 5) (Protein G16). [Source:Uniprot/SWISSPROT;Acc:Q99942]	GO:0006512-ubiquitin cycle	GO:0005515-protein binding;GO:0008270-zinc ion binding;GO:0016874-ligase activity;GO:0046872-metal ion binding	GO:0016020-membrane;GO:0016021-integral to membrane	9.40525	3.69427	2.5459	1.34818	*		26.265	3.69427	7.10967	2.82978	**		26.265	9.40525	2.79259	1.48161	*		26.265	98.1528	0.267593	-1.90189		*
HIST2H2AA	Histone H2A type 2-A (H2A.2). [Source:Uniprot/SWISSPROT;Acc:Q6FI13]	-	-	-	46.5288	10.0122	4.64721	2.21636	**		129.306	10.0122	12.9148	3.69096	***		129.306	46.5288	2.77905	1.47459	*		129.306	41.8081	3.09284	1.62893	*
RS13_HUMAN	40S ribosomal protein S13. [Source:Uniprot/SWISSPROT;Acc:P62277]	GO:0006412-translation	GO:0003723-RNA binding;GO:0003735-structural constituent of ribosome;GO:0005515-protein binding	GO:0005622-intracellular;GO:0005840-ribosome;GO:0005843-cytosolic small ribosomal subunit (sensu Eukaryota)	2799.71	1505.01	1.86026	0.895504			7752.62	1505.01	5.1512	2.36491	**		7752.62	2799.71	2.76908	1.46941	*		7752.62	14755.6	0.525403	-0.928504
-	-	-	-	-	190.474	37.1164	5.1318	2.35946	**		527.357	37.1164	14.2082	3.82865	***		527.357	190.474	2.76866	1.46919	*		527.357	1666.47	0.316451	-1.65995		*
GBG5_HUMAN	Guanine nucleotide-binding protein G(I)/G(S)/G(O) gamma-5 subunit precursor. [Source:Uniprot/SWISSPROT;Acc:P63218]	GO:0007165-signal transduction;GO:0007186-G-protein coupled receptor protein signaling pathway	GO:0004871-signal transducer activity	GO:0005834-heterotrimeric G-protein complex;GO:0016020-membrane	302.598	68.2203	4.4356	2.14913	**		837.533	68.2203	12.2769	3.61787	***		837.533	302.598	2.76781	1.46874	*		837.533	2397.19	0.349381	-1.51713		*
RL19_HUMAN	60S ribosomal protein L19. [Source:Uniprot/SWISSPROT;Acc:P84098]	GO:0006412-translation	GO:0003723-RNA binding;GO:0003735-structural constituent of ribosome	GO:0005622-intracellular;GO:0005840-ribosome;GO:0005842-cytosolic large ribosomal subunit (sensu Eukaryota)	3032.81	1607.8	1.88631	0.915569			8393.93	1607.8	5.22076	2.38426	**		8393.93	3032.81	2.7677	1.46869	*		8393.93	17944.2	0.46778	-1.0961		*
RUVBL1	RuvB-like 1 (EC 3.6.1.-) (49 kDa TATA box-binding protein-interacting protein) (49 kDa TBP-interacting protein) (TIP49a) (Pontin 52) (Nuclear matrix protein 238) (NMP 238) (54 kDa erythrocyte cytosolic protein) (ECP-54) (TIP60-associated protein 54-alpha) [Source:Uniprot/SWISSPROT;Acc:Q9Y265]	GO:0001558-regulation of cell growth;GO:0006310-DNA recombination;GO:0006350-transcription;GO:0006357-regulation of transcription from RNA polymerase II promoter;GO:0007049-cell cycle;GO:0007067-mitosis;GO:0007283-spermatogenesis;GO:0016568-chromatin modification;GO:0051301-cell division	GO:0000166-nucleotide binding;GO:0003678-DNA helicase activity;GO:0005515-protein binding;GO:0005524-ATP binding;GO:0016787-hydrolase activity;GO:0016887-ATPase activity;GO:0017111-nucleoside-triphosphatase activity	GO:0005634-nucleus;GO:0035267-NuA4 histone acetyltransferase complex	17.3147	7.90266	2.19099	1.13158	*		47.7511	7.90266	6.04241	2.59512	**		47.7511	17.3147	2.75784	1.46354	*		47.7511	107.552	0.443983	-1.17142		*
NTF2_HUMAN	Nuclear transport factor 2 (NTF-2) (Placental protein 15) (PP15). [Source:Uniprot/SWISSPROT;Acc:P61970]	GO:0015031-protein transport	GO:0005215-transporter activity;GO:0005515-protein binding	GO:0005622-intracellular;GO:0005643-nuclear pore;GO:0005829-cytosol	16.6108	4.48082	3.70709	1.89029	*		45.784	4.48082	10.2178	3.35301	***		45.784	16.6108	2.75628	1.46272	*		45.784	76.4522	0.598858	-0.739713
RPL6	60S ribosomal protein L6 (TAX-responsive enhancer element-binding protein 107) (TAXREB107) (Neoplasm-related protein C140). [Source:Uniprot/SWISSPROT;Acc:Q02878]	-	-	-	2708.19	1490.62	1.81682	0.861413			7454.77	1490.62	5.00111	2.32225	**		7454.77	2708.19	2.75268	1.46083	*		7454.77	21881.1	0.340694	-1.55345		*
-	nucleophosmin (nucleolar phosphoprotein B23, numatrin)	6886 // intracellular protein transport // inferred from sequence or structural similarity /// 6886 // intracellular protein transport // traceable author statement /// 6913 // nucleocytoplasmic transport // inferred from sequence or structural similarity	5634 // nucleus // inferred from direct assay /// 5634 // nucleus // inferred from sequence or structural similarity /// 5634 // nucleus // traceable author statement /// 5730 // nucleolus // inferred from direct assay /// 5737 // cytoplasm // inferred fr	3713 // transcription coactivator activity // inferred from direct assay /// 3723 // RNA binding // inferred from sequence or structural similarity /// 3723 // RNA binding // traceable author statement /// 30957 // Tat protein binding // inferred from dir	65.366	9.32971	7.00622	2.80864	**		179.801	9.32971	19.2718	4.26842	***		179.801	65.366	2.75067	1.45979	*		179.801	710.86	0.252934	-1.98317		*
HIST2H3C	-	GO:0006334-nucleosome assembly;GO:0007001-chromosome organization and biogenesis (sensu Eukaryota)	GO:0003677-DNA binding	GO:0000786-nucleosome;GO:0005634-nucleus	27.8632	9.76429	2.85358	1.51278	*		76.6286	9.76429	7.84785	2.9723	**		76.6286	27.8632	2.75017	1.45952	*		76.6286	589.297	0.130034	-2.94304		**
SERPINI1	Neuroserpin precursor (Serpin I1) (Protease inhibitor 12). [Source:Uniprot/SWISSPROT;Acc:Q99574]	GO:0007417-central nervous system development;GO:0007422-peripheral nervous system development	GO:0004867-serine-type endopeptidase inhibitor activity	-	14.5471	12.0995	1.20229	0.265783			39.9969	12.0995	3.30567	1.72494	*		39.9969	14.5471	2.74948	1.45916	*		39.9969	66.7396	0.599298	-0.738654
CYP4B1	Cytochrome P450 4B1 (EC 1.14.14.1) (CYPIVB1) (P450-HP). [Source:Uniprot/SWISSPROT;Acc:P13584]	GO:0006118-electron transport	GO:0004497-monooxygenase activity;GO:0005506-iron ion binding;GO:0019825-oxygen binding;GO:0020037-heme binding;GO:0046872-metal ion binding;GO:0050381-unspecific monooxygenase activity	GO:0005783-endoplasmic reticulum;GO:0005792-microsome;GO:0016020-membrane	53.6079	47.3587	1.13196	0.178817			147.192	47.3587	3.10803	1.636	*		147.192	53.6079	2.74571	1.45718	*		147.192	159.331	0.923814	-0.114326
ME3	NADP-dependent malic enzyme, mitochondrial precursor (EC 1.1.1.40) (NADP-ME) (Malic enzyme 3). [Source:Uniprot/SWISSPROT;Acc:Q16798]	GO:0006090-pyruvate metabolic process;GO:0006108-malate metabolic process;GO:0006118-electron transport;GO:0006800-oxygen and reactive oxygen species metabolic process;GO:0009060-aerobic respiration	GO:0004470-malic enzyme activity;GO:0004473-malate dehydrogenase (oxaloacetate-decarboxylating) (NADP+) activity;GO:0016491-oxidoreductase activity;GO:0016616-oxidoreductase activity, acting on the CH-OH group of donors, NAD or NADP as acceptor;GO:0046872-metal ion binding;GO:0048037-cofactor binding;GO:0051287-NAD binding	GO:0005739-mitochondrion	58.0305	12.4466	4.66236	2.22106	**		159.321	12.4466	12.8003	3.67811	***		159.321	58.0305	2.74546	1.45705	*		159.321	544.775	0.292452	-1.77373		*
STAMBP	-	GO:0006512-ubiquitin cycle;GO:0006916-anti-apoptosis;GO:0007259-JAK-STAT cascade;GO:0008284-positive regulation of cell proliferation	GO:0004221-ubiquitin thiolesterase activity;GO:0005515-protein binding;GO:0008237-metallopeptidase activity;GO:0008270-zinc ion binding;GO:0046872-metal ion binding	GO:0005634-nucleus;GO:0016020-membrane	51.5562	20.6846	2.49249	1.31759	*		141.122	20.6846	6.82256	2.77031	**		141.122	51.5562	2.73724	1.45272	*		141.122	231.339	0.610022	-0.713067
EFEMP2	EGF-containing fibulin-like extracellular matrix protein 2 precursor (Fibulin-4) (FIBL-4) (UPH1 protein). [Source:Uniprot/SWISSPROT;Acc:O95967]	GO:0007596-blood coagulation	GO:0004888-transmembrane receptor activity;GO:0005201-extracellular matrix structural constituent;GO:0005509-calcium ion binding;GO:0005515-protein binding	GO:0005604-basement membrane;GO:0016020-membrane	79.046	24.8851	3.17644	1.66741	*		216.002	24.8851	8.67999	3.11769	***		216.002	79.046	2.73262	1.45028	*		216.002	71.2809	3.0303	1.59946	*
CPSF3	Cleavage and polyadenylation specificity factor subunit 3 (Cleavage and polyadenylation specificity factor 73 kDa subunit) (CPSF 73 kDa subunit). [Source:Uniprot/SWISSPROT;Acc:Q9UKF6]	GO:0006378-mRNA polyadenylation;GO:0006379-mRNA cleavage	GO:0003723-RNA binding;GO:0016787-hydrolase activity	GO:0005634-nucleus;GO:0005654-nucleoplasm	29.6707	13.0785	2.26867	1.18184	*		80.961	13.0785	6.1904	2.63003	**		80.961	29.6707	2.72865	1.44819	*		80.961	290.364	0.278826	-1.84256		*
PLXNA2	Plexin-A2 precursor (Semaphorin receptor OCT). [Source:Uniprot/SWISSPROT;Acc:O75051]	GO:0007275-multicellular organismal development	GO:0004872-receptor activity	GO:0016020-membrane;GO:0016021-integral to membrane	15.9623	13.0859	1.2198	0.286648			43.4331	13.0859	3.31906	1.73078	*		43.4331	15.9623	2.72098	1.44413	*		43.4331	84.8901	0.511639	-0.966803
XP_496442.1	-	-	-	-	335.072	172.494	1.94251	0.957925			911.078	172.494	5.28179	2.40103	**		911.078	335.072	2.71905	1.4431	*		911.078	285.532	3.19081	1.67392	*
-	Histone H3.2 (H3/m) (H3/o). [Source:Uniprot/SWISSPROT;Acc:Q71DI3]	-	-	-	13.1221	6.28179	2.08892	1.06276	*		35.6704	6.28179	5.67839	2.50548	**		35.6704	13.1221	2.71834	1.44272	*		35.6704	278.212	0.128213	-2.96338		**
RPL14	ribosomal protein L14-like (RPL14L), misc RNA [Source:RefSeq_dna;Acc:XR_017789]	-	-	-	2517.9	902.13	2.79106	1.48081	*		6838.11	902.13	7.57996	2.92219	**		6838.11	2517.9	2.7158	1.44138	*		6838.11	13893.2	0.492191	-1.02271		*
RS4X_HUMAN	40S ribosomal protein S4, X isoform (Single copy abundant mRNA protein) (SCR10). [Source:Uniprot/SWISSPROT;Acc:P62701]	GO:0000074-regulation of progression through cell cycle;GO:0006412-translation;GO:0007275-multicellular organismal development;GO:0008283-cell proliferation	GO:0003735-structural constituent of ribosome;GO:0019843-rRNA binding	GO:0005622-intracellular;GO:0005840-ribosome;GO:0005843-cytosolic small ribosomal subunit (sensu Eukaryota)	3665.11	3247.94	1.12844	0.174333			9951.57	3247.94	3.06396	1.6154	*		9951.57	3665.11	2.71521	1.44107	*		9951.57	13429.3	0.741033	-0.43239
XP_498429.1	-	-	-	-	11.1706	2.10235	5.31342	2.40964	**		30.2776	2.10235	14.4018	3.84818	***		30.2776	11.1706	2.71046	1.43854	*		30.2776	165.009	0.183491	-2.44622		**
XP_499268.1	Ribosomal protein S26 (Fragment). [Source:Uniprot/SPTREMBL;Acc:Q76N57]	GO:0006412-translation	GO:0003735-structural constituent of ribosome	GO:0005622-intracellular;GO:0005840-ribosome	21.1183	2.54957	8.28309	3.05017	***		57.2012	2.54957	22.4356	4.48772	***		57.2012	21.1183	2.70861	1.43755	*		57.2012	388.178	0.147358	-2.7626		**
ID3	DNA-binding protein inhibitor ID-3 (Inhibitor of DNA binding 3) (ID- like protein inhibitor HLH 1R21) (Helix-loop-helix protein HEIR-1). [Source:Uniprot/SWISSPROT;Acc:Q02535]	GO:0000122-negative regulation of transcription from RNA polymerase II promoter;GO:0007275-multicellular organismal development;GO:0007507-heart development;GO:0016481-negative regulation of transcription;GO:0030855-epithelial cell differentiation;GO:0043433-negative regulation of transcription factor activity	GO:0003714-transcription corepressor activity;GO:0019904-protein domain specific binding	GO:0005634-nucleus	111.221	24.6962	4.50357	2.17107	**		301.176	24.6962	12.1952	3.60824	***		301.176	111.221	2.7079	1.43717	*		301.176	285.792	1.05383	0.0756381
SLC2A4RG	SLC2A4 regulator (GLUT4 enhancer factor) (GEF) (Huntington disease gene regulatory region-binding protein 1) (HDBP-1). [Source:Uniprot/SWISSPROT;Acc:Q9NR83]	GO:0006350-transcription;GO:0006355-regulation of transcription, DNA-dependent	GO:0003700-transcription factor activity;GO:0008270-zinc ion binding;GO:0046872-metal ion binding	GO:0005622-intracellular;GO:0005634-nucleus	39.1956	5.5256	7.09347	2.82649	**		106.091	5.5256	19.1999	4.26303	***		106.091	39.1956	2.7067	1.43654	*		106.091	70.9294	1.49573	0.580846
PCNT1	nucleoporin 85 [Source:RefSeq_peptide;Acc:NP_079120]	GO:0019221-cytokine and chemokine mediated signaling pathway	GO:0005515-protein binding;GO:0015288-porin activity	GO:0005886-plasma membrane;GO:0016021-integral to membrane;GO:0019867-outer membrane	11.2649	2.36342	4.76636	2.25289	**		30.3933	2.36342	12.8599	3.6848	***		30.3933	11.2649	2.69805	1.43192	*		30.3933	273.157	0.111267	-3.16791		***
XP_497726.1	-	GO:0006413-translational initiation	GO:0003743-translation initiation factor activity	-	64.7796	2.37997	27.2187	4.76653	***		174.285	2.37997	73.2303	6.19437	***		174.285	64.7796	2.69044	1.42784	*		174.285	2839.57	0.0613773	-4.02615		***
NP_872363.1	B-cell CLL/lymphoma 9-like [Source:RefSeq_peptide;Acc:NP_872363]	-	-	-	7.70502	6.54643	1.17698	0.235091			20.7296	6.54643	3.16655	1.66291	*		20.7296	7.70502	2.6904	1.42782	*		20.7296	4.07622	5.0855	2.34639	**
MSLN	Mesothelin precursor (Pre-pro-megakaryocyte-potentiating factor) (CAK1 antigen) [Contains: Megakaryocyte-potentiating factor (MPF); Mesothelin, cleaved form]. [Source:Uniprot/SWISSPROT;Acc:Q13421]	GO:0007155-cell adhesion	GO:0005515-protein binding;GO:0042605-peptide antigen binding;GO:0048503-GPI anchor binding	GO:0016020-membrane	182.334	25.8346	7.05774	2.81921	**		489.621	25.8346	18.9521	4.24429	***		489.621	182.334	2.6853	1.42508	*		489.621	54.4083	8.99901	3.16977	***
HIRIP3	HIRA-interacting protein 3. [Source:Uniprot/SWISSPROT;Acc:Q9BW71]	GO:0006333-chromatin assembly or disassembly	-	GO:0005634-nucleus	10.7503	8.8741	1.21142	0.2767			28.8674	8.8741	3.25299	1.70177	*		28.8674	10.7503	2.68527	1.42507	*		28.8674	11.543	2.50086	1.32242	*
SNX5	Sorting nexin-5. [Source:Uniprot/SWISSPROT;Acc:Q9Y5X3]	-	-	-	25.6679	4.97827	5.15599	2.36625	**		68.7534	4.97827	13.8107	3.78771	***		68.7534	25.6679	2.67857	1.42146	*		68.7534	674.602	0.101917	-3.29453		***
NCBP1	Nuclear cap-binding protein subunit 1 (80 kDa nuclear cap-binding protein) (NCBP 80 kDa subunit) (CBP80). [Source:Uniprot/SWISSPROT;Acc:Q09161]	GO:0006379-mRNA cleavage;GO:0006406-mRNA export from nucleus;GO:0006810-transport;GO:0008380-RNA splicing;GO:0031442-positive regulation of mRNA 3'-end processing	GO:0000339-RNA cap binding;GO:0005515-protein binding	GO:0005634-nucleus;GO:0005654-nucleoplasm	17.4013	6.61365	2.63112	1.39568	*		46.5928	6.61365	7.04495	2.81659	**		46.5928	17.4013	2.67754	1.42091	*		46.5928	101.113	0.460799	-1.11779		*
NP_116195.2	Uncharacterized glycosyltransferase AGO61 precursor (EC 2.4.-.-). [Source:Uniprot/SWISSPROT;Acc:Q8NAT1]	-	GO:0016740-transferase activity	-	23.8352	18.3933	1.29586	0.373909			63.7284	18.3933	3.46475	1.79275	*		63.7284	23.8352	2.67371	1.41884	*		63.7284	21.5732	2.95405	1.56269	*
NP_857597.1	zinc finger 804B [Source:RefSeq_peptide;Acc:NP_857597]	-	GO:0003676-nucleic acid binding;GO:0008270-zinc ion binding	GO:0005622-intracellular	12.1812	8.25074	1.47637	0.562056			32.5678	8.25074	3.94726	1.98085	*		32.5678	12.1812	2.67362	1.4188	*		32.5678	55.1731	0.590284	-0.760519
NCOA4	Nuclear receptor coactivator 4 (NCoA-4) (70 kDa androgen receptor coactivator) (70 kDa AR-activator) (Ret-activating protein ELE1). [Source:Uniprot/SWISSPROT;Acc:Q13772]	GO:0006350-transcription;GO:0007169-transmembrane receptor protein tyrosine kinase signaling pathway;GO:0008584-male gonad development;GO:0030521-androgen receptor signaling pathway;GO:0045893-positive regulation of transcription, DNA-dependent	GO:0003713-transcription coactivator activity;GO:0005515-protein binding;GO:0050681-androgen receptor binding	GO:0005634-nucleus	72.9468	14.7756	4.93697	2.30363	**		194.801	14.7756	13.184	3.72071	***		194.801	72.9468	2.67045	1.41709	*		194.801	890.32	0.218799	-2.19232		**
BCAR1	Breast cancer anti-estrogen resistance protein 1 (CRK-associated substrate) (p130cas). [Source:Uniprot/SWISSPROT;Acc:P56945]	GO:0001558-regulation of cell growth;GO:0007015-actin filament organization;GO:0007155-cell adhesion;GO:0007173-epidermal growth factor receptor signaling pathway;GO:0007186-G-protein coupled receptor protein signaling pathway;GO:0007229-integrin-mediated signaling pathway;GO:0008283-cell proliferation;GO:0008286-insulin receptor signaling pathway;GO:0016477-cell migration;GO:0030335-positive reg…	GO:0004871-signal transducer activity;GO:0005515-protein binding;GO:0019901-protein kinase binding;GO:0019903-protein phosphatase binding	GO:0001726-ruffle;GO:0005624-membrane fraction;GO:0005737-cytoplasm;GO:0005925-focal adhesion	90.5801	47.0731	1.92424	0.94429			241.349	47.0731	5.12711	2.35815	**		241.349	90.5801	2.66448	1.41386	*		241.349	47.5057	5.08043	2.34495	**
TTRAP	TRAF and TNF receptor-associated protein (ETS1-associated protein 2) (ETS1-associated protein II) (EAPII). [Source:Uniprot/SWISSPROT;Acc:O95551]	GO:0007166-cell surface receptor linked signal transduction	GO:0003714-transcription corepressor activity	GO:0005634-nucleus	15.4524	4.2656	3.62256	1.85701	*		41.1488	4.2656	9.64666	3.27003	***		41.1488	15.4524	2.66294	1.41302	*		41.1488	477.106	0.0862466	-3.53539		***
RPS5	40S ribosomal protein S5. [Source:Uniprot/SWISSPROT;Acc:P46782]	GO:0006412-translation	GO:0003723-RNA binding;GO:0003735-structural constituent of ribosome	GO:0005622-intracellular;GO:0005843-cytosolic small ribosomal subunit (sensu Eukaryota)	1853.47	1423.4	1.30214	0.380889			4921.65	1423.4	3.45767	1.7898	*		4921.65	1853.47	2.65537	1.40891	*		4921.65	7559.28	0.651074	-0.619106
DECR2	Peroxisomal 2,4-dienoyl-CoA reductase (EC 1.3.1.34) (2,4-dienoyl-CoA reductase 2) (pDCR). [Source:Uniprot/SWISSPROT;Acc:Q9NUI1]	GO:0008152-metabolic process	GO:0008670-2,4-dienoyl-CoA reductase (NADPH) activity;GO:0016491-oxidoreductase activity	GO:0005777-peroxisome	13.322	6.55026	2.03381	1.02418	*		35.35	6.55026	5.39674	2.43209	**		35.35	13.322	2.65351	1.4079	*		35.35	26.6273	1.32759	0.408808
NP_060337.1	similar to CG1218-PA (LOC646058), mRNA [Source:RefSeq_dna;Acc:XR_019292]	-	-	GO:0005634-nucleus	22.8462	8.61569	2.6517	1.40692	*		60.583	8.61569	7.03171	2.81388	**		60.583	22.8462	2.65177	1.40696	*		60.583	213.862	0.283281	-1.81969		*
XP_371243.1	-	GO:0006412-translation	GO:0003735-structural constituent of ribosome	GO:0005622-intracellular;GO:0005840-ribosome	448.111	141.682	3.16279	1.6612	*		1187.66	141.682	8.38258	3.06739	***		1187.66	448.111	2.65037	1.4062	*		1187.66	2404.37	0.493961	-1.01753		*
EFHA1	EF-hand domain-containing family member A1. [Source:Uniprot/SWISSPROT;Acc:Q8IYU8]	-	GO:0005509-calcium ion binding	-	21.2822	2.16573	9.8268	3.29672	***		56.386	2.16573	26.0355	4.70241	***		56.386	21.2822	2.64944	1.40569	*		56.386	417.522	0.135049	-2.88844		**
IGBP1	Immunoglobulin-binding protein 1 (CD79a-binding protein 1) (B cell signal transduction molecule alpha 4) (Alpha 4 protein) (Renal carcinoma antigen NY-REN-16). [Source:Uniprot/SWISSPROT;Acc:P78318]	GO:0009607-response to biotic stimulus;GO:0009966-regulation of signal transduction;GO:0042113-B cell activation	GO:0008601-protein phosphatase type 2A regulator activity	GO:0005737-cytoplasm	159.96	29.0222	5.51163	2.46248	**		423.708	29.0222	14.5994	3.86784	***		423.708	159.96	2.64884	1.40536	*		423.708	1515.36	0.279609	-1.83852		*
TNFAIP1	BTB/POZ domain-containing protein TNFAIP1 (Tumor necrosis factor, alpha-induced protein 1, endothelial) (Protein B12). [Source:Uniprot/SWISSPROT;Acc:Q13829]	GO:0006813-potassium ion transport;GO:0006955-immune response;GO:0009790-embryonic development	GO:0003674-molecular_function;GO:0005249-voltage-gated potassium channel activity;GO:0005515-protein binding	GO:0005575-cellular_component;GO:0008076-voltage-gated potassium channel complex;GO:0016020-membrane	51.1805	24.1443	2.11977	1.08391	*		135.543	24.1443	5.61386	2.48899	**		135.543	51.1805	2.64833	1.40508	*		135.543	575.899	0.235359	-2.08707		**
-	-	-	-	-	263.759	33.8243	7.79793	2.96309	**		698.401	33.8243	20.6479	4.36792	***		698.401	263.759	2.64787	1.40483	*		698.401	4174.77	0.167291	-2.57957		**
Q8NF59_HUMAN	-	-	-	-	46.2037	24.8155	1.86189	0.896765			122.332	24.8155	4.92965	2.30149	**		122.332	46.2037	2.64767	1.40472	*		122.332	1396.86	0.0875762	-3.51332		***
YWHAQ	14-3-3 protein theta (14-3-3 protein tau) (14-3-3 protein T-cell) (HS1 protein). [Source:Uniprot/SWISSPROT;Acc:P27348]	GO:0000074-regulation of progression through cell cycle;GO:0006605-protein targeting;GO:0006887-exocytosis;GO:0007264-small GTPase mediated signal transduction	GO:0008426-protein kinase C inhibitor activity;GO:0019904-protein domain specific binding	-	27.085	7.56195	3.58175	1.84066	*		71.6905	7.56195	9.48042	3.24495	***		71.6905	27.085	2.64687	1.40429	*		71.6905	668.361	0.107263	-3.22077		***
-	-	-	-	-	2342.53	1596.66	1.46714	0.553008			6193.51	1596.66	3.87904	1.9557	*		6193.51	2342.53	2.64394	1.40269	*		6193.51	8566.13	0.723023	-0.467887
TEF	Thyrotroph embryonic factor. [Source:Uniprot/SWISSPROT;Acc:Q10587]	GO:0006350-transcription;GO:0006357-regulation of transcription from RNA polymerase II promoter;GO:0048511-rhythmic process	GO:0003700-transcription factor activity;GO:0003702-RNA polymerase II transcription factor activity;GO:0043565-sequence-specific DNA binding;GO:0046983-protein dimerization activity	GO:0005634-nucleus	22.6959	11.2016	2.02613	1.01873	*		59.981	11.2016	5.35469	2.4208	**		59.981	22.6959	2.64281	1.40207	*		59.981	58.0936	1.03249	0.0461269
COX7A1	Cytochrome c oxidase polypeptide VIIa-heart, mitochondrial precursor (EC 1.9.3.1) (Cytochrome c oxidase subunit VIIa-H) (COX VIIa-M). [Source:Uniprot/SWISSPROT;Acc:P24310]	GO:0006118-electron transport	GO:0004129-cytochrome-c oxidase activity;GO:0009055-electron carrier activity	GO:0005739-mitochondrion;GO:0005746-mitochondrial electron transport chain;GO:0016020-membrane;GO:0016021-integral to membrane	24.2328	9.38045	2.58333	1.36923	*		64.0399	9.38045	6.82696	2.77124	**		64.0399	24.2328	2.64269	1.40201	*		64.0399	394.208	0.162452	-2.62191		**
XP_496363.1	-	GO:0006412-translation	GO:0003723-RNA binding;GO:0003735-structural constituent of ribosome	GO:0005622-intracellular;GO:0015935-small ribosomal subunit	879.025	184.879	4.75459	2.24932	**		2314.48	184.879	12.5189	3.64603	***		2314.48	879.025	2.633	1.39671	*		2314.48	2839.15	0.8152	-0.294774
CETN2	Centrin-2 (Caltractin isoform 1). [Source:Uniprot/SWISSPROT;Acc:P41208]	GO:0007049-cell cycle;GO:0007067-mitosis;GO:0051301-cell division	GO:0005509-calcium ion binding;GO:0005515-protein binding	GO:0005622-intracellular;GO:0005814-centriole	16.2854	2.6975	6.0372	2.59388	**		42.8729	2.6975	15.8935	3.99037	***		42.8729	16.2854	2.6326	1.39649	*		42.8729	214.033	0.20031	-2.31969		**
RL37A_HUMAN	60S ribosomal protein L37a. [Source:Uniprot/SWISSPROT;Acc:P61513]	GO:0006412-translation	GO:0003735-structural constituent of ribosome;GO:0008270-zinc ion binding;GO:0046872-metal ion binding	GO:0005622-intracellular;GO:0005840-ribosome	3807.7	1816.81	2.09582	1.06751	*		10014.6	1816.81	5.51219	2.46263	**		10014.6	3807.7	2.63009	1.39511	*		10014.6	11774.5	0.850529	-0.233567
IL10RB	Interleukin-10 receptor beta chain precursor (IL-10R-B) (IL-10R2) (Cytokine receptor family 2 member 4) (Cytokine receptor class-II member 4) (CRF2-4) (CDw210b antigen). [Source:Uniprot/SWISSPROT;Acc:Q08334]	GO:0006954-inflammatory response;GO:0006955-immune response;GO:0007165-signal transduction;GO:0007596-blood coagulation	GO:0004872-receptor activity;GO:0004920-interleukin-10 receptor activity;GO:0005515-protein binding	GO:0005886-plasma membrane;GO:0016021-integral to membrane;GO:0032002-interleukin-28 receptor complex	74.2465	19.1833	3.87036	1.95247	*		195.271	19.1833	10.1792	3.34755	***		195.271	74.2465	2.63003	1.39508	*		195.271	469.144	0.416227	-1.26456		*
ATP5F1	ATP synthase B chain, mitochondrial precursor (EC 3.6.3.14). [Source:Uniprot/SWISSPROT;Acc:P24539]	GO:0006811-ion transport;GO:0015986-ATP synthesis coupled proton transport;GO:0015992-proton transport	GO:0005215-transporter activity;GO:0005515-protein binding;GO:0046933-hydrogen ion transporting ATP synthase activity, rotational mechanism;GO:0046961-hydrogen ion transporting ATPase activity, rotational mechanism	GO:0005624-membrane fraction;GO:0005739-mitochondrion;GO:0005743-mitochondrial inner membrane;GO:0005759-mitochondrial matrix;GO:0016469-proton-transporting two-sector ATPase complex;GO:0045263-proton-transporting ATP synthase complex, coupling factor F(o)	81.518	13.5925	5.99727	2.58431	**		213.864	13.5925	15.734	3.97581	***		213.864	81.518	2.62352	1.39151	*		213.864	2045.1	0.104574	-3.2574		***
A4GNT	Alpha-1,4-N-acetylglucosaminyltransferase (EC 2.4.1.-) (Alpha4GnT). [Source:Uniprot/SWISSPROT;Acc:Q9UNA3]	GO:0005975-carbohydrate metabolic process;GO:0006493-protein amino acid O-linked glycosylation;GO:0009101-glycoprotein biosynthetic process	GO:0008375-acetylglucosaminyltransferase activity;GO:0008378-galactosyltransferase activity;GO:0016757-transferase activity, transferring glycosyl groups	GO:0005624-membrane fraction;GO:0005795-Golgi stack;GO:0016020-membrane;GO:0016021-integral to membrane	13.8799	11.2788	1.23062	0.299387			36.404	11.2788	3.22765	1.69049	*		36.404	13.8799	2.62278	1.3911	*		36.404	858.639	0.0423974	-4.55988		***
Q86XJ2_HUMAN	1-phosphatidylinositol-4,5-bisphosphate phosphodiesterase eta 2 (EC 3.1.4.11) (Phosphoinositide phospholipase C) (Phospholipase C-eta- 2) (PLC-eta-2) (Phosphoinositide phospholipase C-like 4) (Phospholipase C-like 4) (Fragment). [Source:Uniprot/SWISSPROT;Acc:O75038]	GO:0006629-lipid metabolic process;GO:0007242-intracellular signaling cascade;GO:0008150-biological_process;GO:0016042-lipid catabolic process	GO:0003674-molecular_function;GO:0004435-phosphoinositide phospholipase C activity;GO:0004871-signal transducer activity;GO:0005509-calcium ion binding;GO:0016787-hydrolase activity	GO:0005575-cellular_component	15.3006	8.21531	1.86245	0.897199			40.1217	8.21531	4.88377	2.288	**		40.1217	15.3006	2.62223	1.3908	*		40.1217	9.11468	4.40188	2.13812	**
DDT	D-dopachrome decarboxylase (EC 4.1.1.84) (D-dopachrome tautomerase) (Phenylpyruvate tautomerase II). [Source:Uniprot/SWISSPROT;Acc:P30046]	-	-	-	43.7199	11.8134	3.70087	1.88787	*		114.43	11.8134	9.68643	3.27597	***		114.43	43.7199	2.61734	1.3881	*		114.43	242.777	0.471337	-1.08517		*
-	Zinc finger protein 208. [Source:Uniprot/SWISSPROT;Acc:O43345]	-	-	-	15.5938	4.462	3.4948	1.80521	*		40.8076	4.462	9.14559	3.19308	***		40.8076	15.5938	2.61692	1.38787	*		40.8076	134.598	0.303182	-1.72174		*
XP_499267.1	-	GO:0006412-translation	GO:0003723-RNA binding;GO:0003735-structural constituent of ribosome	GO:0005622-intracellular;GO:0005840-ribosome;GO:0005842-cytosolic large ribosomal subunit (sensu Eukaryota)	866.845	210.285	4.12223	2.04343	**		2268.3	210.285	10.7868	3.43119	***		2268.3	866.845	2.61673	1.38776	*		2268.3	8605.68	0.263581	-1.92368		*
MTPN	Myotrophin (Protein V-1). [Source:Uniprot/SWISSPROT;Acc:P58546]	GO:0006417-regulation of translation;GO:0016049-cell growth;GO:0016202-regulation of striated muscle development;GO:0030182-neuron differentiation	GO:0005515-protein binding	GO:0005575-cellular_component;GO:0005622-intracellular	264.261	106.934	2.47125	1.30524	*		691.349	106.934	6.46519	2.69269	**		691.349	264.261	2.61616	1.38745	*		691.349	1908.63	0.362223	-1.46505		*
M6PRBP1	Mannose-6-phosphate receptor-binding protein 1 (Cargo selection protein TIP47) (47 kDa mannose 6-phosphate receptor-binding protein) (47 kDa MPR-binding protein) (Placental protein 17) (PP17). [Source:Uniprot/SWISSPROT;Acc:O60664]	GO:0016192-vesicle-mediated transport	-	GO:0005737-cytoplasm;GO:0005768-endosome;GO:0005794-Golgi apparatus;GO:0016020-membrane	146.744	73.8987	1.98574	0.989679			383.605	73.8987	5.19096	2.376	**		383.605	146.744	2.61412	1.38632	*		383.605	400.124	0.958717	-0.0608235
HSDL2	hydroxysteroid dehydrogenase like 2 [Source:RefSeq_peptide;Acc:NP_115679]	GO:0008152-metabolic process	GO:0005498-sterol carrier activity;GO:0016491-oxidoreductase activity	-	17.9144	3.84733	4.65633	2.21919	**		46.7959	3.84733	12.1632	3.60445	***		46.7959	17.9144	2.61219	1.38526	*		46.7959	181.129	0.258357	-1.95256		*
SH3BGRL	SH3 domain-binding glutamic acid-rich-like protein. [Source:Uniprot/SWISSPROT;Acc:O75368]	-	GO:0005070-SH3/SH2 adaptor activity	GO:0005634-nucleus;GO:0005737-cytoplasm	28.2929	19.1269	1.47922	0.564834			73.8443	19.1269	3.86075	1.94888	*		73.8443	28.2929	2.60999	1.38405	*		73.8443	155.752	0.474114	-1.07669		*
GYPC	Glycophorin C (PAS-2') (Glycoprotein beta) (GLPC) (Glycoconnectin) (Sialoglycoprotein D) (Glycophorin D) (GPD) (CD236 antigen). [Source:Uniprot/SWISSPROT;Acc:P04921]	GO:0006487-protein amino acid N-linked glycosylation;GO:0006493-protein amino acid O-linked glycosylation;GO:0009887-organ morphogenesis	GO:0005515-protein binding	GO:0005886-plasma membrane;GO:0005887-integral to plasma membrane;GO:0030863-cortical cytoskeleton	7.99206	6.47039	1.23517	0.304715			20.7765	6.47039	3.21101	1.68303	*		20.7765	7.99206	2.59964	1.37831	*		20.7765	6.40743	3.24256	1.69713	*
GLTSCR2	Glioma tumor suppressor candidate region gene 2 protein (p60). [Source:Uniprot/SWISSPROT;Acc:Q9NZM5]	GO:0008150-biological_process	GO:0003674-molecular_function	GO:0005622-intracellular;GO:0005634-nucleus	11.8376	12.3998	0.954661	-0.0669389			30.7691	12.3998	2.48142	1.31117	*		30.7691	11.8376	2.59927	1.3781	*		30.7691	49.2592	0.624638	-0.678909
EIF2S2	-	GO:0006413-translational initiation	GO:0003723-RNA binding;GO:0003743-translation initiation factor activity;GO:0008270-zinc ion binding;GO:0046872-metal ion binding	GO:0005840-ribosome;GO:0005850-eukaryotic translation initiation factor 2 complex	63.2599	8.42553	7.50812	2.90845	**		164.374	8.42553	19.509	4.28607	***		164.374	63.2599	2.59839	1.37762	*		164.374	2383.48	0.0689636	-3.85802		***
FUBP2_HUMAN	-	GO:0006350-transcription;GO:0006355-regulation of transcription, DNA-dependent;GO:0006397-mRNA processing;GO:0006810-transport;GO:0008380-RNA splicing;GO:0051028-mRNA transport	GO:0003677-DNA binding;GO:0003723-RNA binding;GO:0005515-protein binding;GO:0031202-RNA splicing factor activity, transesterification mechanism	GO:0005634-nucleus	77.0284	54.9991	1.40054	0.485984			199.885	54.9991	3.63434	1.86169	*		199.885	77.0284	2.59495	1.37571	*		199.885	60.9475	3.27963	1.71353	*
XP_497657.1	-	GO:0006412-translation	GO:0003735-structural constituent of ribosome	GO:0005622-intracellular;GO:0005840-ribosome	602.537	174.069	3.46149	1.79139	*		1563.05	174.069	8.97951	3.16664	***		1563.05	602.537	2.59411	1.37524	*		1563.05	5731.46	0.272714	-1.87454		*
-	-	-	-	-	7.76238	2.03551	3.81348	1.93111	*		20.1336	2.03551	9.89116	3.30614	***		20.1336	7.76238	2.59374	1.37503	*		20.1336	412.103	0.0488558	-4.35533		***
Q9BXW1_HUMAN	B5 receptor [Source:RefSeq_peptide;Acc:NP_006351]	-	-	-	72.2439	12.6392	5.71585	2.51497	**		187.298	12.6392	14.8188	3.88935	***		187.298	72.2439	2.59257	1.37438	*		187.298	1869.33	0.100195	-3.31912		***
-	-	GO:0006413-translational initiation;GO:0006917-induction of apoptosis	GO:0003723-RNA binding;GO:0003735-structural constituent of ribosome;GO:0005515-protein binding	GO:0005622-intracellular;GO:0005634-nucleus;GO:0005829-cytosol;GO:0005840-ribosome;GO:0005843-cytosolic small ribosomal subunit (sensu Eukaryota)	2578.72	416.329	6.19394	2.63086	**		6682.47	416.329	16.0509	4.00458	***		6682.47	2578.72	2.59139	1.37373	*		6682.47	29548.2	0.226155	-2.14462		**
-	-	-	-	-	135.885	13.1316	10.348	3.37128	***		351.758	13.1316	26.7872	4.74347	***		351.758	135.885	2.58864	1.3722	*		351.758	5168.57	0.0680571	-3.87711		***
NP_061189.2	Cell division cycle-associated 7-like protein (Protein JPO2) (Transcription factor RAM2). [Source:Uniprot/SWISSPROT;Acc:Q96GN5]	GO:0006350-transcription;GO:0006355-regulation of transcription, DNA-dependent	-	GO:0005634-nucleus	31.1325	3.60466	8.63675	3.11049	***		80.5847	3.60466	22.3557	4.48257	***		80.5847	31.1325	2.58844	1.37208	*		80.5847	249.135	0.323458	-1.62835		*
Q5T6D9_HUMAN	Ribosomal protein L15 (Fragment). [Source:Uniprot/SPTREMBL;Acc:Q76N55]	-	-	-	55.817	8.53051	6.54322	2.71	**		144.35	8.53051	16.9216	4.0808	***		144.35	55.817	2.58613	1.3708	*		144.35	3524.84	0.0409523	-4.60991		***
O43412_HUMAN	1-acyl-sn-glycerol-3-phosphate acyltransferase eta (EC 2.3.1.51) (1- AGP acyltransferase 7) (1-AGPAT 7) (Lysophosphatidic acid acyltransferase eta) (LPAAT-eta) (Acyltransferase-like 3). [Source:Uniprot/SWISSPROT;Acc:Q643R3]	GO:0008152-metabolic process;GO:0008654-phospholipid biosynthetic process	GO:0003841-1-acylglycerol-3-phosphate O-acyltransferase activity;GO:0008415-acyltransferase activity;GO:0016740-transferase activity	GO:0005783-endoplasmic reticulum;GO:0016020-membrane;GO:0016021-integral to membrane	24.7918	24.11	1.02828	0.0402338			64.0973	24.11	2.65854	1.41063	*		64.0973	24.7918	2.58542	1.3704	*		64.0973	22.1754	2.89047	1.5313	*
C1orf41	Placental protein 25 (PP25). [Source:Uniprot/SWISSPROT;Acc:Q9Y547]	GO:0007155-cell adhesion	-	-	47.2186	11.5636	4.08339	2.02977	**		121.738	11.5636	10.5277	3.39611	***		121.738	47.2186	2.57817	1.36635	*		121.738	692.611	0.175766	-2.50827		**
MT1B	Metallothionein-1B (MT-1B) (Metallothionein-IB) (MT-IB). [Source:Uniprot/SWISSPROT;Acc:P07438]	GO:0008150-biological_process	GO:0005507-copper ion binding;GO:0008270-zinc ion binding;GO:0046870-cadmium ion binding;GO:0046872-metal ion binding	GO:0005737-cytoplasm	21.9962	17.3487	1.26789	0.342427			56.697	17.3487	3.26809	1.70845	*		56.697	21.9962	2.57758	1.36602	*		56.697	310.296	0.182719	-2.4523		**
-	-	-	GO:0005515-protein binding	-	8.49765	3.20928	2.64784	1.40481	*		21.881	3.20928	6.81802	2.76935	**		21.881	8.49765	2.57494	1.36454	*		21.881	86.0195	0.254372	-1.97499		*
Q13666_HUMAN	40S ribosomal protein S21. [Source:Uniprot/SWISSPROT;Acc:P63220]	GO:0006412-translation;GO:0008283-cell proliferation;GO:0030154-cell differentiation	GO:0003674-molecular_function;GO:0003723-RNA binding;GO:0003735-structural constituent of ribosome;GO:0043022-ribosome binding	GO:0005575-cellular_component;GO:0005622-intracellular;GO:0005840-ribosome;GO:0005843-cytosolic small ribosomal subunit (sensu Eukaryota)	986.893	117.829	8.37566	3.0662	***		2537.63	117.829	21.5366	4.42872	***		2537.63	986.893	2.57134	1.36252	*		2537.63	10646.8	0.238348	-2.06886		**
IQGAP1	Ras GTPase-activating-like protein IQGAP1 (p195). [Source:Uniprot/SWISSPROT;Acc:P46940]	GO:0007165-signal transduction;GO:0046580-negative regulation of Ras protein signal transduction;GO:0051056-regulation of small GTPase mediated signal transduction	GO:0005095-GTPase inhibitor activity;GO:0005099-Ras GTPase activator activity;GO:0005516-calmodulin binding	GO:0005622-intracellular;GO:0005737-cytoplasm;GO:0005884-actin filament;GO:0016020-membrane	34.5131	10.7938	3.19749	1.67694	*		88.7037	10.7938	8.21802	3.03879	***		88.7037	34.5131	2.57015	1.36185	*		88.7037	167.856	0.528453	-0.920154
MRP63	Mitochondrial ribosomal protein 63 (bMRP63). [Source:Uniprot/SWISSPROT;Acc:Q9BQC6]	GO:0006412-translation	GO:0003735-structural constituent of ribosome	GO:0005739-mitochondrion;GO:0005761-mitochondrial ribosome;GO:0030529-ribonucleoprotein complex	13.443	4.38953	3.06251	1.61471	*		34.5065	4.38953	7.8611	2.97473	**		34.5065	13.443	2.56688	1.36002	*		34.5065	77.6976	0.444113	-1.171		*
NR_002187.1	-	GO:0008152-metabolic process	GO:0003824-catalytic activity;GO:0004807-triose-phosphate isomerase activity	-	72.2845	79.1026	0.913807	-0.130039			185.158	79.1026	2.34074	1.22696	*		185.158	72.2845	2.56152	1.357	*		185.158	340.018	0.544555	-0.876851
SPC22_HUMAN	Signal peptidase complex subunit 3 (EC 3.4.-.-) (Microsomal signal peptidase 23 kDa subunit) (SPase 22 kDa subunit) (SPC22/23). [Source:Uniprot/SWISSPROT;Acc:P61009]	GO:0006465-signal peptide processing	GO:0009003-signal peptidase activity	GO:0005783-endoplasmic reticulum;GO:0005787-signal peptidase complex;GO:0005792-microsome;GO:0016020-membrane;GO:0016021-integral to membrane	27.9888	9.55018	2.93071	1.55125	*		71.6873	9.55018	7.50638	2.90812	**		71.6873	27.9888	2.56128	1.35687	*		71.6873	255.015	0.28111	-1.83079		*
G22P1	ATP-dependent DNA helicase 2 subunit 1 (ATP-dependent DNA helicase II 70 kDa subunit) (Lupus Ku autoantigen protein p70) (Ku70) (70 kDa subunit of Ku antigen) (Thyroid-lupus autoantigen) (TLAA) (CTC box- binding factor 75 kDa subunit) (CTCBF) (CTC75) (DNA [Source:Uniprot/SWISSPROT;Acc:P12956]	GO:0006303-double-strand break repair via nonhomologous end joining	GO:0003677-DNA binding;GO:0004003-ATP-dependent DNA helicase activity	GO:0005634-nucleus;GO:0005958-DNA-dependent protein kinase complex	38.9385	8.44603	4.61028	2.20485	**		99.7019	8.44603	11.8046	3.56128	***		99.7019	38.9385	2.56049	1.35642	*		99.7019	383.402	0.260045	-1.94317		*
SHB	SH2 domain-containing adapter protein B. [Source:Uniprot/SWISSPROT;Acc:Q15464]	GO:0001525-angiogenesis;GO:0006915-apoptosis;GO:0007242-intracellular signaling cascade;GO:0007275-multicellular organismal development;GO:0030154-cell differentiation;GO:0042100-B cell proliferation	GO:0005070-SH3/SH2 adaptor activity;GO:0005515-protein binding	GO:0016020-membrane	20.9568	20.0667	1.04436	0.0626151			53.6367	20.0667	2.67292	1.41842	*		53.6367	20.9568	2.55939	1.3558	*		53.6367	34.1118	1.57238	0.652951
TINF2	-	GO:0007004-telomere maintenance via telomerase	GO:0003677-DNA binding;GO:0005515-protein binding;GO:0042162-telomeric DNA binding	GO:0000781-chromosome, telomeric region;GO:0005634-nucleus;GO:0005694-chromosome	88.9431	72.7427	1.22271	0.29008			227.624	72.7427	3.12916	1.64578	*		227.624	88.9431	2.55921	1.3557	*		227.624	460.573	0.494218	-1.01678		*
KPNA2	Importin alpha-2 subunit (Karyopherin alpha-2 subunit) (SRP1-alpha) (RAG cohort protein 1). [Source:Uniprot/SWISSPROT;Acc:P52292]	-	-	-	446.995	270.53	1.6523	0.724473			1143.57	270.53	4.22717	2.07969	**		1143.57	446.995	2.55836	1.35522	*		1143.57	971.59	1.17701	0.235132
MT1L	Metallothionein-1X (MT-1X) (Metallothionein-IX) (MT-IX). [Source:Uniprot/SWISSPROT;Acc:P80297]	GO:0010038-response to metal ion	GO:0005507-copper ion binding;GO:0008270-zinc ion binding;GO:0046870-cadmium ion binding;GO:0046872-metal ion binding	-	19.4136	24.596	0.789296	-0.341361			49.6283	24.596	2.01773	1.01274	*		49.6283	19.4136	2.55637	1.3541	*		49.6283	115.155	0.430969	-1.21435		*
RL26_HUMAN	60S ribosomal protein L26. [Source:Uniprot/SWISSPROT;Acc:P61254]	GO:0006412-translation	GO:0003723-RNA binding;GO:0003735-structural constituent of ribosome;GO:0005515-protein binding	GO:0005622-intracellular;GO:0005842-cytosolic large ribosomal subunit (sensu Eukaryota);GO:0015934-large ribosomal subunit	9.82121	11.7207	0.837936	-0.255088			25.0968	11.7207	2.14124	1.09845	*		25.0968	9.82121	2.55537	1.35353	*		25.0968	1942.97	0.0129168	-6.27461		***
TTC11	Mitochondrial fission 1 protein (Fis1 homolog) (hFis1) (Tetratricopeptide repeat protein 11) (TPR repeat protein 11). [Source:Uniprot/SWISSPROT;Acc:Q9Y3D6]	GO:0000266-mitochondrial fission;GO:0006915-apoptosis;GO:0016559-peroxisome fission	GO:0005515-protein binding	GO:0005739-mitochondrion;GO:0005777-peroxisome;GO:0005779-integral to peroxisomal membrane;GO:0016020-membrane;GO:0016021-integral to membrane;GO:0019867-outer membrane;GO:0031307-integral to mitochondrial outer membrane	16.4835	9.49692	1.73566	0.795488			42.1209	9.49692	4.43522	2.14901	**		42.1209	16.4835	2.55535	1.35352	*		42.1209	49.6069	0.849093	-0.236005
C2orf25	Uncharacterized protein C2orf25, mitochondrial precursor. [Source:Uniprot/SWISSPROT;Acc:Q9H3L0]	-	-	GO:0005739-mitochondrion	39.3533	7.38477	5.32899	2.41386	**		100.541	7.38477	13.6147	3.76709	***		100.541	39.3533	2.55483	1.35323	*		100.541	364.691	0.275689	-1.85889		*
NP_997215.1	Glutamate-rich protein 1. [Source:Uniprot/SWISSPROT;Acc:Q86X53]	-	-	-	28.3799	14.0015	2.02692	1.01929	*		72.4544	14.0015	5.17477	2.37149	**		72.4544	28.3799	2.55302	1.3522	*		72.4544	38.1318	1.90011	0.92608
NP_036231.1	RNA polymerase I-associated factor PAF49 (Anti-sense to ERCC-1 protein) (ASE-1) (CD3-epsilon-associated protein) (CD3E-associated protein) (CAST). [Source:Uniprot/SWISSPROT;Acc:O15446]	GO:0006955-immune response;GO:0007169-transmembrane receptor protein tyrosine kinase signaling pathway;GO:0009303-rRNA transcription	GO:0005515-protein binding	GO:0000120-RNA polymerase I transcription factor complex;GO:0005634-nucleus;GO:0005730-nucleolus;GO:0005736-DNA-directed RNA polymerase I complex	8.17558	8.22044	0.994543	-0.00789445			20.8494	8.22044	2.53629	1.34272	*		20.8494	8.17558	2.5502	1.35061	*		20.8494	40.0766	0.520238	-0.942757
XP_497095.1	-	GO:0006412-translation	GO:0003735-structural constituent of ribosome	GO:0005622-intracellular;GO:0005840-ribosome	37.7134	5.68897	6.62923	2.72884	**		96.1521	5.68897	16.9015	4.07908	***		96.1521	37.7134	2.54955	1.35024	*		96.1521	822.779	0.116863	-3.09711		***
AHCYL1	Putative adenosylhomocysteinase 2 (EC 3.3.1.1) (S-adenosyl-L- homocysteine hydrolase 2) (AdoHcyase 2) (S-adenosylhomocysteine hydrolase-like 1) (DC-expressed AHCY-like molecule). [Source:Uniprot/SWISSPROT;Acc:O43865]	GO:0006730-one-carbon compound metabolic process	GO:0004013-adenosylhomocysteinase activity;GO:0016787-hydrolase activity	GO:0005783-endoplasmic reticulum	26.5317	9.81359	2.70357	1.43487	*		67.3465	9.81359	6.86258	2.77875	**		67.3465	26.5317	2.53834	1.34388	*		67.3465	95.8277	0.702788	-0.508839
ARPC3	Actin-related protein 2/3 complex subunit 3 (ARP2/3 complex 21 kDa subunit) (p21-ARC). [Source:Uniprot/SWISSPROT;Acc:O15145]	-	-	-	80.235	29.999	2.67459	1.41932	*		203.602	29.999	6.78697	2.76277	**		203.602	80.235	2.53757	1.34345	*		203.602	909.397	0.223887	-2.15916		**
HIST1H2AD	Histone H2A type 1-D (H2A.3). [Source:Uniprot/SWISSPROT;Acc:P20671]	-	-	-	10.6444	7.34526	1.44915	0.535208			26.9554	7.34526	3.66977	1.87569	*		26.9554	10.6444	2.53236	1.34048	*		26.9554	27.5733	0.977591	-0.0326969
-	-	-	-	-	443.149	62.6904	7.06885	2.82148	**		1121.94	62.6904	17.8965	4.16161	***		1121.94	443.149	2.53174	1.34013	*		1121.94	4402.33	0.254851	-1.97227		*
-	Nonhistone chromosomal protein HMG-17 (High-mobility group nucleosome- binding domain-containing protein 2). [Source:Uniprot/SWISSPROT;Acc:P05204]	-	-	-	8.66443	8.9715	0.965772	-0.0502453			21.9164	8.9715	2.44289	1.28859	*		21.9164	8.66443	2.52947	1.33884	*		21.9164	432.029	0.0507291	-4.30104		***
NP_612470.1	Transmembrane 4 L6 family member 19. [Source:Uniprot/SWISSPROT;Acc:Q96DZ7]	-	-	-	23.2146	7.7344	3.00147	1.58567	*		58.6898	7.7344	7.58815	2.92375	**		58.6898	23.2146	2.52814	1.33808	*		58.6898	268.288	0.218757	-2.1926		**
NP_689423.1	GAS2-like protein 1 (Growth arrest-specific 2-like 1) (GAS2-related protein on chromosome 22) (GAR22 protein). [Source:Uniprot/SWISSPROT;Acc:Q99501]	GO:0007050-cell cycle arrest	-	GO:0005856-cytoskeleton	19.0954	6.11952	3.1204	1.64173	*		48.0919	6.11952	7.85876	2.9743	**		48.0919	19.0954	2.51851	1.33257	*		48.0919	44.0679	1.09131	0.126063
-	-	-	-	-	2918.56	1069.53	2.72883	1.44828	*		7346.96	1069.53	6.86935	2.78017	**		7346.96	2918.56	2.51733	1.33189	*		7346.96	4820	1.52427	0.608115
CARS	Cysteinyl-tRNA synthetase, cytoplasmic (EC 6.1.1.16) (Cysteine--tRNA ligase) (CysRS). [Source:Uniprot/SWISSPROT;Acc:P49589]	GO:0006412-translation;GO:0006423-cysteinyl-tRNA aminoacylation	GO:0000049-tRNA binding;GO:0000166-nucleotide binding;GO:0004817-cysteine-tRNA ligase activity;GO:0004872-receptor activity;GO:0005524-ATP binding;GO:0008270-zinc ion binding;GO:0016874-ligase activity;GO:0046872-metal ion binding	GO:0005625-soluble fraction;GO:0005737-cytoplasm	12.6168	11.5677	1.09069	0.125239			31.7455	11.5677	2.74432	1.45645	*		31.7455	12.6168	2.51614	1.33121	*		31.7455	124.94	0.254087	-1.9766		*
METAP2	Methionine aminopeptidase 2 (EC 3.4.11.18) (MetAP 2) (Peptidase M 2) (Initiation factor 2-associated 67 kDa glycoprotein) (p67) (p67eIF2). [Source:Uniprot/SWISSPROT;Acc:P50579]	GO:0006508-proteolysis;GO:0016485-protein processing;GO:0018206-peptidyl-methionine modification;GO:0031365-N-terminal protein amino acid modification	GO:0004239-methionyl aminopeptidase activity;GO:0005515-protein binding;GO:0008233-peptidase activity;GO:0046872-metal ion binding;GO:0050897-cobalt ion binding	GO:0005737-cytoplasm	37.1268	5.29761	7.00822	2.80905	**		93.396	5.29761	17.6298	4.13995	***		93.396	37.1268	2.5156	1.3309	*		93.396	528.997	0.176553	-2.50183		**
O75239_HUMAN	Paf1, RNA polymerase II associated factor, homolog [Source:RefSeq_peptide;Acc:NP_061961]	-	-	-	18.0777	13.4279	1.34628	0.428974			45.3716	13.4279	3.37889	1.75655	*		45.3716	18.0777	2.50981	1.32758	*		45.3716	22.7589	1.99357	0.995357
ATP5L	ATP synthase subunit g, mitochondrial (EC 3.6.3.14) (ATPase subunit g). [Source:Uniprot/SWISSPROT;Acc:O75964]	GO:0006811-ion transport;GO:0015986-ATP synthesis coupled proton transport;GO:0015992-proton transport	GO:0005515-protein binding;GO:0046872-metal ion binding;GO:0046933-hydrogen ion transporting ATP synthase activity, rotational mechanism;GO:0046961-hydrogen ion transporting ATPase activity, rotational mechanism	GO:0005739-mitochondrion;GO:0016469-proton-transporting two-sector ATPase complex;GO:0045263-proton-transporting ATP synthase complex, coupling factor F(o)	19.8158	4.26659	4.64442	2.2155	**		49.6849	4.26659	11.6451	3.54165	***		49.6849	19.8158	2.50733	1.32615	*		49.6849	580.323	0.0856159	-3.54598		***
NP_055217.1	Ubiquinol-cytochrome c reductase complex ubiquinone-binding protein QP-C (EC 1.10.2.2) (Ubiquinol-cytochrome c reductase complex 9.5 kDa protein) (Complex III subunit VII). [Source:Uniprot/SWISSPROT;Acc:O14949]	GO:0006118-electron transport;GO:0006810-transport	GO:0008121-ubiquinol-cytochrome-c reductase activity;GO:0016491-oxidoreductase activity	GO:0005739-mitochondrion;GO:0005750-mitochondrial respiratory chain complex III;GO:0016020-membrane	126.868	49.61	2.55731	1.35463	*		318.036	49.61	6.41072	2.68049	**		318.036	126.868	2.50682	1.32586	*		318.036	872.403	0.364551	-1.45581		*
RPL10	60S ribosomal protein L10 (QM protein) (Tumor suppressor QM) (Laminin receptor homolog). [Source:Uniprot/SWISSPROT;Acc:P27635]	-	-	-	1449.8	263.131	5.5098	2.462	**		3633.28	263.131	13.8079	3.78742	***		3633.28	1449.8	2.50605	1.32542	*		3633.28	5837.64	0.622388	-0.684114
LAMB3	Laminin subunit beta-3 precursor (Laminin 5 beta 3) (Laminin B1k chain) (Kalinin B1 chain). [Source:Uniprot/SWISSPROT;Acc:Q13751]	GO:0006118-electron transport;GO:0007155-cell adhesion;GO:0008544-epidermis development	GO:0005198-structural molecule activity;GO:0005506-iron ion binding;GO:0005515-protein binding;GO:0009055-electron carrier activity;GO:0020037-heme binding	GO:0005578-proteinaceous extracellular matrix;GO:0005604-basement membrane;GO:0005610-laminin-5 complex	21.9903	8.55009	2.57194	1.36286	*		55.0399	8.55009	6.43735	2.68647	**		55.0399	21.9903	2.50291	1.32361	*		55.0399	266.32	0.206668	-2.27461		**
PRNP	Major prion protein precursor (PrP) (PrP27-30) (PrP33-35C) (ASCR) (CD230 antigen). [Source:Uniprot/SWISSPROT;Acc:P04156]	GO:0006878-copper ion homeostasis;GO:0006979-response to oxidative stress;GO:0008152-metabolic process	GO:0005507-copper ion binding;GO:0005515-protein binding;GO:0008017-microtubule binding;GO:0048503-GPI anchor binding	GO:0005737-cytoplasm;GO:0005783-endoplasmic reticulum;GO:0005794-Golgi apparatus;GO:0005886-plasma membrane;GO:0019898-extrinsic to membrane;GO:0045121-lipid raft	100.094	16.7941	5.96005	2.57533	**		250.362	16.7941	14.9077	3.89799	***		250.362	100.094	2.50127	1.32266	*		250.362	1060.54	0.23607	-2.08271		**
-	similar to ribosomal protein S2 (LOC730799), mRNA [Source:RefSeq_dna;Acc:XR_015559]	-	-	-	414.121	52.5678	7.87785	2.9778	**		1035.31	52.5678	19.6947	4.29973	***		1035.31	414.121	2.50001	1.32193	*		1035.31	2060.91	0.502353	-0.993227
PGD	6-phosphogluconate dehydrogenase, decarboxylating (EC 1.1.1.44). [Source:Uniprot/SWISSPROT;Acc:P52209]	GO:0006118-electron transport;GO:0009051-pentose-phosphate shunt, oxidative branch	GO:0004616-phosphogluconate dehydrogenase (decarboxylating) activity;GO:0005515-protein binding;GO:0016491-oxidoreductase activity;GO:0050661-NADP binding	-	116.57	44.8358	2.59992	1.37847	*		291.213	44.8358	6.4951	2.69935	**		291.213	116.57	2.49819	1.32088	*		291.213	380.051	0.766248	-0.384116
XP_496446.1	-	GO:0006412-translation	GO:0003735-structural constituent of ribosome	GO:0005622-intracellular;GO:0005840-ribosome	627.439	207.978	3.01685	1.59304	*		1563.64	207.978	7.51827	2.9104	**		1563.64	627.439	2.4921	1.31736	*		1563.64	4468.78	0.349903	-1.51497		*
CJ084_HUMAN	Uncharacterized protein C10orf84. [Source:Uniprot/SWISSPROT;Acc:Q9H8W3]	-	-	-	16.1506	3.00012	5.38333	2.4285	**		40.0993	3.00012	13.3659	3.74049	***		40.0993	16.1506	2.48283	1.31199	*		40.0993	139.704	0.28703	-1.80072		*
DNMT3A	DNA (cytosine-5)-methyltransferase 3A (EC 2.1.1.37) (Dnmt3a) (DNA methyltransferase HsaIIIA) (DNA MTase HsaIIIA) (M.HsaIIIA). [Source:Uniprot/SWISSPROT;Acc:Q9Y6K1]	GO:0006306-DNA methylation;GO:0006349-imprinting	GO:0003677-DNA binding;GO:0003886-DNA (cytosine-5-)-methyltransferase activity;GO:0005515-protein binding;GO:0008168-methyltransferase activity;GO:0008270-zinc ion binding;GO:0016740-transferase activity;GO:0046872-metal ion binding	GO:0000791-euchromatin;GO:0005634-nucleus;GO:0005737-cytoplasm;GO:0016363-nuclear matrix	25.3587	6.03213	4.20393	2.07174	**		62.866	6.03213	10.4219	3.38154	***		62.866	25.3587	2.47907	1.3098	*		62.866	159.218	0.394841	-1.34066		*
H4_HUMAN	Histone H4. [Source:Uniprot/SWISSPROT;Acc:P62805]	-	-	-	182.404	113.918	1.60119	0.679142			451.254	113.918	3.96122	1.98595	*		451.254	182.404	2.47393	1.3068	*		451.254	332.56	1.35691	0.440322
EIF3S10	Eukaryotic translation initiation factor 3 subunit 10 (eIF-3 theta) (eIF3 p167) (eIF3 p180) (eIF3 p185) (eIF3a). [Source:Uniprot/SWISSPROT;Acc:Q14152]	GO:0006412-translation;GO:0006446-regulation of translational initiation;GO:0008150-biological_process	GO:0003743-translation initiation factor activity;GO:0005198-structural molecule activity;GO:0005515-protein binding	GO:0005737-cytoplasm;GO:0005852-eukaryotic translation initiation factor 3 complex	11.6198	6.05002	1.92062	0.941572			28.6898	6.05002	4.74209	2.24552	**		28.6898	11.6198	2.46904	1.30395	*		28.6898	124.964	0.229584	-2.12291		**
NP_056107.1	Protein FAM62A (Membrane-bound C2 domain-containing protein). [Source:Uniprot/SWISSPROT;Acc:Q9BSJ8]	-	-	GO:0016020-membrane;GO:0016021-integral to membrane	20.3421	7.13634	2.8505	1.51121	*		49.8893	7.13634	6.99088	2.80547	**		49.8893	20.3421	2.45251	1.29426	*		49.8893	165.556	0.301343	-1.73052		*
IFNAR2	Interferon-alpha/beta receptor beta chain precursor (IFN-alpha-REC) (Type I interferon receptor) (IFN-R) (Interferon alpha/beta receptor 2). [Source:Uniprot/SWISSPROT;Acc:P48551]	GO:0006357-regulation of transcription from RNA polymerase II promoter;GO:0007166-cell surface receptor linked signal transduction;GO:0007259-JAK-STAT cascade;GO:0008283-cell proliferation;GO:0009615-response to virus	GO:0004872-receptor activity;GO:0004905-interferon-alpha/beta receptor activity;GO:0005515-protein binding	GO:0005576-extracellular region;GO:0005615-extracellular space;GO:0005886-plasma membrane;GO:0005887-integral to plasma membrane	13.4929	10.5115	1.28364	0.360242			33.0249	10.5115	3.1418	1.65159	*		33.0249	13.4929	2.44757	1.29135	*		33.0249	91.77	0.359866	-1.47447		*
RPL36	60S ribosomal protein L36. [Source:Uniprot/SWISSPROT;Acc:Q9Y3U8]	GO:0006412-translation	GO:0003735-structural constituent of ribosome	GO:0005622-intracellular;GO:0005730-nucleolus;GO:0005840-ribosome;GO:0005842-cytosolic large ribosomal subunit (sensu Eukaryota)	803.979	698.721	1.15064	0.202442			1967.79	698.721	2.81628	1.49379	*		1967.79	803.979	2.44757	1.29135	*		1967.79	3283.1	0.599371	-0.73848
Q9NQ39_HUMAN	OTTHUMP00000029938. [Source:Uniprot/SPTREMBL;Acc:Q9NQ39]	-	-	-	25.1592	8.23938	3.05353	1.61048	*		61.5157	8.23938	7.46605	2.90035	**		61.5157	25.1592	2.44506	1.28987	*		61.5157	1158.1	0.0531175	-4.23467		***
NP_003513.1	Histone H2B type 1-C/E/F/G/I (H2B.a/g/h/k/l) (H2B.1 A) (H2B/a) (H2B/g) (H2B/h) (H2B/k) (H2B/l). [Source:Uniprot/SWISSPROT;Acc:P62807]	-	-	-	16.3884	7.24651	2.26156	1.17732	*		40.0601	7.24651	5.52819	2.46681	**		40.0601	16.3884	2.44442	1.28949	*		40.0601	42.292	0.947228	-0.0782171
PFN1	Profilin-1 (Profilin I). [Source:Uniprot/SWISSPROT;Acc:P07737]	GO:0001843-neural tube closure;GO:0006357-regulation of transcription from RNA polymerase II promoter;GO:0007010-cytoskeleton organization and biogenesis;GO:0030036-actin cytoskeleton organization and biogenesis	GO:0003785-actin monomer binding;GO:0005515-protein binding	GO:0005634-nucleus;GO:0005737-cytoplasm;GO:0015629-actin cytoskeleton	29.7588	6.92613	4.29661	2.1032	**		72.7417	6.92613	10.5025	3.39266	***		72.7417	29.7588	2.44437	1.28947	*		72.7417	52.9559	1.37363	0.45799
-	-	-	-	-	460.547	120.13	3.83373	1.93875	*		1121.87	120.13	9.33876	3.22323	***		1121.87	460.547	2.43595	1.28448	*		1121.87	2859.84	0.392284	-1.35003		*
-	-	-	-	-	11.5383	2.89396	3.98703	1.99531	*		28.0633	2.89396	9.6972	3.27757	***		28.0633	11.5383	2.43219	1.28225	*		28.0633	281.039	0.0998557	-3.32401		***
MFHAS1	malignant fibrous histiocytoma amplified sequence 1 [Source:RefSeq_peptide;Acc:NP_004216]	GO:0007264-small GTPase mediated signal transduction	GO:0005515-protein binding;GO:0005525-GTP binding	-	9.75875	7.59207	1.28539	0.362203			23.7258	7.59207	3.12507	1.64389	*		23.7258	9.75875	2.43123	1.28169	*		23.7258	30.0895	0.788507	-0.342805
TNFRSF18	Tumor necrosis factor receptor superfamily member 18 precursor (Glucocorticoid-induced TNFR-related protein) (Activation-inducible TNFR family receptor). [Source:Uniprot/SWISSPROT;Acc:Q9Y5U5]	GO:0006916-anti-apoptosis;GO:0007165-signal transduction	GO:0004872-receptor activity;GO:0005031-tumor necrosis factor receptor activity	GO:0016020-membrane;GO:0016021-integral to membrane	14.1553	9.77909	1.44751	0.533568			34.4053	9.77909	3.51825	1.81486	*		34.4053	14.1553	2.43056	1.28129	*		34.4053	46.0052	0.747856	-0.419167
BBC3	Bcl-2-binding component 3 (p53 up-regulated modulator of apoptosis) (JFY-1). [Source:Uniprot/SWISSPROT;Acc:Q9BXH1]	GO:0001836-release of cytochrome c from mitochondria;GO:0006915-apoptosis;GO:0006917-induction of apoptosis;GO:0006919-caspase activation;GO:0042771-DNA damage response, signal transduction by p53 class mediator resulting in induction of apoptosis;GO:0045926-negative regulation of growth	GO:0005515-protein binding	GO:0005739-mitochondrion	16.2817	18.1603	0.896555	-0.157537			39.5505	18.1603	2.17786	1.12291	*		39.5505	16.2817	2.42914	1.28044	*		39.5505	12.3378	3.20563	1.68061	*
RNC_HUMAN	Ribonuclease III (EC 3.1.26.3) (RNase III) (Drosha) (p241). [Source:Uniprot/SWISSPROT;Acc:Q9NRR4]	GO:0006396-RNA processing	GO:0003725-double-stranded RNA binding;GO:0004519-endonuclease activity;GO:0004525-ribonuclease III activity;GO:0005515-protein binding;GO:0016787-hydrolase activity	GO:0005622-intracellular;GO:0005634-nucleus	53.4107	14.3459	3.72306	1.89649	*		129.724	14.3459	9.04257	3.17673	***		129.724	53.4107	2.4288	1.28025	*		129.724	566.273	0.229084	-2.12605		**
DDX24	ATP-dependent RNA helicase DDX24 (EC 3.6.1.-) (DEAD box protein 24). [Source:Uniprot/SWISSPROT;Acc:Q9GZR7]	GO:0016070-RNA metabolic process	GO:0000166-nucleotide binding;GO:0003723-RNA binding;GO:0004004-ATP-dependent RNA helicase activity;GO:0005524-ATP binding;GO:0016787-hydrolase activity	GO:0005575-cellular_component;GO:0005730-nucleolus	55.1875	25.4198	2.17105	1.11839	*		133.989	25.4198	5.27104	2.39809	**		133.989	55.1875	2.42788	1.2797	*		133.989	352.162	0.380474	-1.39413		*
Q8N5E3_HUMAN	C20orf199 protein (Fragment). [Source:Uniprot/SPTREMBL;Acc:Q8N5E3]	-	-	-	120.421	9.60215	12.5411	3.64859	***		292.1	9.60215	30.4203	4.92696	***		292.1	120.421	2.42566	1.27837	*		292.1	2299.43	0.127032	-2.97674		**
FAM20B	Protein FAM20B precursor. [Source:Uniprot/SWISSPROT;Acc:O75063]	-	-	-	72.6163	14.6133	4.9692	2.31301	**		176.124	14.6133	12.0523	3.59124	***		176.124	72.6163	2.4254	1.27822	*		176.124	589.767	0.298633	-1.74355		*
NPM1	Nucleophosmin (NPM) (Nucleolar phosphoprotein B23) (Numatrin) (Nucleolar protein NO38). [Source:Uniprot/SWISSPROT;Acc:P06748]	GO:0006886-intracellular protein transport;GO:0006913-nucleocytoplasmic transport;GO:0006916-anti-apoptosis;GO:0006950-response to stress;GO:0007098-centrosome cycle;GO:0007165-signal transduction;GO:0007569-cell aging;GO:0008285-negative regulation of cell proliferation;GO:0042255-ribosome assembly;GO:0051092-activation of NF-kappaB transcription factor	GO:0003713-transcription coactivator activity;GO:0003723-RNA binding;GO:0030957-Tat protein binding;GO:0042803-protein homodimerization activity;GO:0046982-protein heterodimerization activity;GO:0051059-NF-kappaB binding;GO:0051082-unfolded protein binding	GO:0005634-nucleus;GO:0005730-nucleolus;GO:0005737-cytoplasm;GO:0005813-centrosome	499.06	77.2546	6.45994	2.69152	**		1210.32	77.2546	15.6666	3.96962	***		1210.32	499.06	2.42519	1.2781	*		1210.32	9020.13	0.13418	-2.89776		**
SLC25A6	ADP/ATP translocase 3 (Adenine nucleotide translocator 2) (ANT 3) (ADP,ATP carrier protein 3) (Solute carrier family 25 member 6) (ADP,ATP carrier protein, isoform T2). [Source:Uniprot/SWISSPROT;Acc:P12236]	GO:0006810-transport;GO:0006839-mitochondrial transport;GO:0006915-apoptosis	GO:0005215-transporter activity;GO:0005471-ATP:ADP antiporter activity;GO:0005488-binding;GO:0005515-protein binding	GO:0005739-mitochondrion;GO:0005743-mitochondrial inner membrane;GO:0005744-mitochondrial inner membrane presequence translocase complex;GO:0016020-membrane;GO:0016021-integral to membrane	217.264	129.861	1.67305	0.742478			525.782	129.861	4.04879	2.01749	**		525.782	217.264	2.42001	1.27501	*		525.782	553.985	0.94909	-0.0753829
-	-	-	-	-	23.8404	13.7029	1.73981	0.798932			57.5597	13.7029	4.20056	2.07058	**		57.5597	23.8404	2.41437	1.27165	*		57.5597	39.4097	1.46055	0.546511
NM_013387.3	ubiquinol-cytochrome c reductase complex 7.2kDa protein isoform b [Source:RefSeq_peptide;Acc:NP_001003684]	GO:0006122-mitochondrial electron transport, ubiquinol to cytochrome c;GO:0006810-transport	GO:0008121-ubiquinol-cytochrome-c reductase activity;GO:0016491-oxidoreductase activity	GO:0005739-mitochondrion;GO:0005740-mitochondrial envelope;GO:0005746-mitochondrial electron transport chain;GO:0016020-membrane	411.069	110.415	3.72296	1.89645	*		988.787	110.415	8.95522	3.16273	***		988.787	411.069	2.4054	1.26628	*		988.787	1498.14	0.660009	-0.599443
C7orf30	Uncharacterized protein C7orf30. [Source:Uniprot/SWISSPROT;Acc:Q96EH3]	-	-	-	86.0383	13.9891	6.1504	2.62068	**		206.855	13.9891	14.7869	3.88625	***		206.855	86.0383	2.40422	1.26557	*		206.855	689.707	0.299917	-1.73737		*
AD16_HUMAN	Coiled-coil domain-containing protein 53. [Source:Uniprot/SWISSPROT;Acc:Q9Y3C0]	GO:0008150-biological_process	GO:0003674-molecular_function	GO:0005575-cellular_component	103.348	40.0642	2.57956	1.36713	*		247.759	40.0642	6.18405	2.62855	**		247.759	103.348	2.39732	1.26143	*		247.759	466.037	0.531629	-0.911508
NP_006848.1	U4/U6.U5 tri-snRNP-associated protein 3 (U4/U6.U5 tri-snRNP-associated 27 kDa protein) (27K) (Nucleic acid-binding protein RY-1). [Source:Uniprot/SWISSPROT;Acc:Q8WVK2]	GO:0006397-mRNA processing;GO:0008150-biological_process;GO:0008380-RNA splicing	GO:0003676-nucleic acid binding	GO:0005575-cellular_component;GO:0005634-nucleus	11.6069	4.90736	2.36519	1.24196	*		27.7937	4.90736	5.66367	2.50174	**		27.7937	11.6069	2.39459	1.25978	*		27.7937	70.2785	0.395479	-1.33833		*
STRAP	Serine-threonine kinase receptor-associated protein (UNR-interacting protein) (WD-40 repeat protein PT-WD) (MAP activator with WD repeats). [Source:Uniprot/SWISSPROT;Acc:Q9Y3F4]	GO:0000122-negative regulation of transcription from RNA polymerase II promoter;GO:0006397-mRNA processing;GO:0008380-RNA splicing;GO:0030512-negative regulation of transforming growth factor beta receptor signaling pathway	GO:0005102-receptor binding	GO:0005634-nucleus;GO:0005681-spliceosome	330.017	245.231	1.34574	0.428401			789.173	245.231	3.21808	1.6862	*		789.173	330.017	2.39131	1.2578	*		789.173	731.124	1.0794	0.110226
NP_055121.1	UPF0027 protein C22orf28. [Source:Uniprot/SWISSPROT;Acc:Q9Y3I0]	-	-	-	47.6657	11.6967	4.07514	2.02685	**		113.945	11.6967	9.74162	3.28416	***		113.945	47.6657	2.3905	1.25731	*		113.945	528.07	0.215776	-2.21239		**
NP_689531.1	Uncharacterized protein C12orf45. [Source:Uniprot/SWISSPROT;Acc:Q8N5I9]	-	-	-	44.6622	50.4994	0.884411	-0.177211			106.531	50.4994	2.10955	1.07694	*		106.531	44.6622	2.38526	1.25415	*		106.531	289.602	0.367853	-1.4428		*
-	-	-	-	-	17.1054	3.46757	4.93297	2.30246	**		40.7432	3.46757	11.7498	3.55456	***		40.7432	17.1054	2.38189	1.2521	*		40.7432	132.104	0.308418	-1.69704		*
-	EP300 interacting inhibitor of differentiation 1 (EID1), mRNA [Source:RefSeq_dna;Acc:NM_014335]	GO:0000122-negative regulation of transcription from RNA polymerase II promoter;GO:0008150-biological_process	GO:0005515-protein binding;GO:0016566-specific transcriptional repressor activity	GO:0005575-cellular_component;GO:0005634-nucleus	328.547	223.534	1.46979	0.555606			781.675	223.534	3.4969	1.80608	*		781.675	328.547	2.37919	1.25047	*		781.675	763.177	1.02424	0.0345504
ZNF302	Zinc finger protein 181 (HHZ181). [Source:Uniprot/SWISSPROT;Acc:Q2M3W8]	GO:0006350-transcription;GO:0006355-regulation of transcription, DNA-dependent	GO:0003677-DNA binding;GO:0008270-zinc ion binding;GO:0046872-metal ion binding	GO:0005622-intracellular;GO:0005634-nucleus	74.517	12.2693	6.07347	2.60252	**		177.267	12.2693	14.4481	3.85281	***		177.267	74.517	2.37889	1.25029	*		177.267	841.791	0.210584	-2.24753		**
UBL5	Ubiquitin-like protein 5. [Source:Uniprot/SWISSPROT;Acc:Q9BZL1]	GO:0006512-ubiquitin cycle;GO:0008150-biological_process	GO:0003674-molecular_function	GO:0005737-cytoplasm	47.7987	6.64512	7.19305	2.8466	**		113.684	6.64512	17.108	4.0966	***		113.684	47.7987	2.3784	1.24999	*		113.684	768.168	0.147994	-2.75639		**
PMYT1_HUMAN	Membrane-associated tyrosine- and threonine-specific cdc2-inhibitory kinase (EC 2.7.11.1) (Myt1 kinase). [Source:Uniprot/SWISSPROT;Acc:Q99640]	GO:0000079-regulation of cyclin-dependent protein kinase activity;GO:0006468-protein amino acid phosphorylation;GO:0007049-cell cycle;GO:0007088-regulation of mitosis	GO:0000166-nucleotide binding;GO:0004674-protein serine/threonine kinase activity;GO:0005515-protein binding;GO:0005524-ATP binding;GO:0016740-transferase activity	GO:0005624-membrane fraction;GO:0005783-endoplasmic reticulum;GO:0005794-Golgi apparatus;GO:0016020-membrane	17.2623	14.2207	1.21388	0.279629			41.0327	14.2207	2.88542	1.52878	*		41.0327	17.2623	2.37702	1.24915	*		41.0327	15.0509	2.72626	1.44692	*
RPL4	60S ribosomal protein L4 (L1). [Source:Uniprot/SWISSPROT;Acc:P36578]	GO:0006412-translation	GO:0003723-RNA binding;GO:0003735-structural constituent of ribosome;GO:0005515-protein binding	GO:0005622-intracellular;GO:0005840-ribosome;GO:0005842-cytosolic large ribosomal subunit (sensu Eukaryota)	155.46	20.1427	7.71797	2.94822	**		369.355	20.1427	18.337	4.19668	***		369.355	155.46	2.37588	1.24846	*		369.355	8169.93	0.0452091	-4.46724		***
C17orf37	Uncharacterized protein C17orf37 (Protein C35) (HBV X-transactivated gene 4 protein). [Source:Uniprot/SWISSPROT;Acc:Q9BRT3]	GO:0045454-cell redox homeostasis	GO:0008430-selenium binding	-	45.812	23.2904	1.96699	0.975992			108.542	23.2904	4.66036	2.22044	**		108.542	45.812	2.36928	1.24445	*		108.542	119.971	0.90473	-0.144441
PSMB2	Proteasome subunit beta type 2 (EC 3.4.25.1) (Proteasome component C7- I) (Macropain subunit C7-I) (Multicatalytic endopeptidase complex subunit C7-I). [Source:Uniprot/SWISSPROT;Acc:P49721]	GO:0006511-ubiquitin-dependent protein catabolic process	GO:0004298-threonine endopeptidase activity	GO:0005634-nucleus;GO:0005829-cytosol;GO:0005839-proteasome core complex (sensu Eukaryota)	53.4048	9.20461	5.80196	2.53654	**		126.466	9.20461	13.7394	3.78025	***		126.466	53.4048	2.36806	1.24371	*		126.466	290.619	0.435161	-1.20038		*
PRDX1	Peroxiredoxin-1 (EC 1.11.1.15) (Thioredoxin peroxidase 2) (Thioredoxin-dependent peroxide reductase 2) (Proliferation-associated gene protein) (PAG) (Natural killer cell-enhancing factor A) (NKEF-A). [Source:Uniprot/SWISSPROT;Acc:Q06830]	GO:0001501-skeletal development;GO:0008283-cell proliferation	GO:0016491-oxidoreductase activity;GO:0051920-peroxiredoxin activity	-	232.185	64.2029	3.61642	1.85456	*		549.423	64.2029	8.5576	3.09721	***		549.423	232.185	2.36632	1.24264	*		549.423	1772.44	0.309981	-1.68975		*
RBP5	Retinol-binding protein III, cellular (CRBP-III) (HRBPiso). [Source:Uniprot/SWISSPROT;Acc:P82980]	GO:0006810-transport	GO:0005478-intracellular transporter activity;GO:0008289-lipid binding;GO:0016918-retinal binding;GO:0019841-retinol binding	GO:0005737-cytoplasm	12.6633	7.05401	1.79519	0.844136			29.9497	7.05401	4.24576	2.08602	**		29.9497	12.6633	2.36508	1.24189	*		29.9497	77.6339	0.385781	-1.37415		*
XP_497935.1	-	-	-	-	16.0372	3.35117	4.78554	2.25868	**		37.8369	3.35117	11.2907	3.49706	***		37.8369	16.0372	2.35933	1.23838	*		37.8369	2746.56	0.0137761	-6.18169		***
ATAD1	ATPase family AAA domain-containing protein 1. [Source:Uniprot/SWISSPROT;Acc:Q8NBU5]	-	GO:0000166-nucleotide binding;GO:0005524-ATP binding;GO:0017111-nucleoside-triphosphatase activity	-	22.2692	7.27453	3.06125	1.61412	*		52.5184	7.27453	7.21949	2.8519	**		52.5184	22.2692	2.35835	1.23778	*		52.5184	246.362	0.213176	-2.22989		**
VDAC3	Voltage-dependent anion-selective channel protein 3 (VDAC-3) (hVDAC3) (Outer mitochondrial membrane protein porin 3). [Source:Uniprot/SWISSPROT;Acc:Q9Y277]	GO:0006820-anion transport;GO:0015853-adenine transport	GO:0005515-protein binding;GO:0008308-voltage-gated ion-selective channel activity;GO:0015482-voltage-gated anion channel porin activity	GO:0005739-mitochondrion;GO:0005741-mitochondrial outer membrane;GO:0005887-integral to plasma membrane;GO:0016020-membrane;GO:0019867-outer membrane	89.5189	13.9787	6.40395	2.67896	**		211.056	13.9787	15.0984	3.91633	***		211.056	89.5189	2.35767	1.23736	*		211.056	889.088	0.237385	-2.0747		**
TCEAL3	Transcription elongation factor A protein-like 3 (TCEA-like protein 3) (Transcription elongation factor S-II protein-like 3). [Source:Uniprot/SWISSPROT;Acc:Q969E4]	GO:0006350-transcription;GO:0006355-regulation of transcription, DNA-dependent	-	GO:0005634-nucleus	123.756	44.7384	2.7662	1.46791	*		291.74	44.7384	6.52103	2.7051	**		291.74	123.756	2.35739	1.23719	*		291.74	214.657	1.3591	0.44265
SRP14	Signal recognition particle 14 kDa protein (SRP14) (18 kDa Alu RNA- binding protein). [Source:Uniprot/SWISSPROT;Acc:P37108]	GO:0006605-protein targeting;GO:0006613-cotranslational protein targeting to membrane	GO:0005515-protein binding;GO:0008312-7S RNA binding	GO:0005737-cytoplasm;GO:0005786-signal recognition particle, endoplasmic reticulum targeting;GO:0030529-ribonucleoprotein complex	264.988	23.9986	11.0418	3.4649	***		623.879	23.9986	25.9964	4.70024	***		623.879	264.988	2.35437	1.23534	*		623.879	4323.33	0.144305	-2.79281		**
ACAD9	Acyl-CoA dehydrogenase family member 9, mitochondrial precursor (EC 1.3.99.-) (ACAD-9). [Source:Uniprot/SWISSPROT;Acc:Q9H845]	GO:0006118-electron transport;GO:0008152-metabolic process	GO:0003995-acyl-CoA dehydrogenase activity;GO:0050660-FAD binding	GO:0005739-mitochondrion	11.9488	5.1509	2.31975	1.21397	*		28.1021	5.1509	5.45576	2.44778	**		28.1021	11.9488	2.35188	1.23381	*		28.1021	98.8518	0.284285	-1.81459		*
PARK7	Protein DJ-1 (Oncogene DJ1). [Source:Uniprot/SWISSPROT;Acc:Q99497]	GO:0006457-protein folding;GO:0007265-Ras protein signal transduction;GO:0008344-adult locomotory behavior;GO:0042542-response to hydrogen peroxide;GO:0051583-dopamine uptake	GO:0005515-protein binding	GO:0005634-nucleus;GO:0005737-cytoplasm	83.2229	3.67236	22.662	4.5022	***		195.484	3.67236	53.2313	5.7342	***		195.484	83.2229	2.34893	1.232	*		195.484	1592.65	0.122742	-3.0263		***
RPL27A	60S ribosomal protein L27a. [Source:Uniprot/SWISSPROT;Acc:P46776]	GO:0006412-translation	GO:0003735-structural constituent of ribosome	GO:0005622-intracellular;GO:0005840-ribosome	69.8464	2.6622	26.2363	4.71349	***		163.902	2.6622	61.5665	5.94407	***		163.902	69.8464	2.34661	1.23058	*		163.902	4021.68	0.0407547	-4.61689		***
-	60S ribosomal protein L5. [Source:Uniprot/SWISSPROT;Acc:P46777]	-	-	-	117.111	12.9556	9.03941	3.17623	***		274.671	12.9556	21.2009	4.40606	***		274.671	117.111	2.34539	1.22983	*		274.671	4081.51	0.0672962	-3.89333		***
FAM14B	Protein FAM14B (ISG12(c) protein). [Source:Uniprot/SWISSPROT;Acc:Q96BM0]	-	-	GO:0016020-membrane;GO:0016021-integral to membrane	12.6071	7.99887	1.57611	0.656373			29.5665	7.99887	3.69634	1.8861	*		29.5665	12.6071	2.34522	1.22972	*		29.5665	68.1833	0.433633	-1.20545		*
MYADM	Myeloid-associated differentiation marker (SB135). [Source:Uniprot/SWISSPROT;Acc:Q96S97]	-	-	GO:0016020-membrane;GO:0016021-integral to membrane	42.3325	40.3492	1.04915	0.0692274			99.1342	40.3492	2.45691	1.29684	*		99.1342	42.3325	2.3418	1.22762	*		99.1342	52.2242	1.89824	0.924665
XPA	DNA-repair protein complementing XP-A cells (Xeroderma pigmentosum group A-complementing protein). [Source:Uniprot/SWISSPROT;Acc:P23025]	GO:0006289-nucleotide-excision repair;GO:0006979-response to oxidative stress	GO:0003684-damaged DNA binding;GO:0005515-protein binding;GO:0008270-zinc ion binding;GO:0046872-metal ion binding	GO:0005634-nucleus	16.9666	8.07478	2.10119	1.0712	*		39.7091	8.07478	4.91767	2.29797	**		39.7091	16.9666	2.34042	1.22677	*		39.7091	110.511	0.359321	-1.47665		*
Q9BUX9_HUMAN	Tubulin alpha-ubiquitous chain (Alpha-tubulin ubiquitous) (Tubulin K- alpha-1). [Source:Uniprot/SWISSPROT;Acc:P68363]	GO:0007018-microtubule-based movement;GO:0051258-protein polymerization	GO:0000166-nucleotide binding;GO:0003924-GTPase activity;GO:0005198-structural molecule activity;GO:0005525-GTP binding	GO:0005874-microtubule;GO:0043234-protein complex	377.906	100.99	3.74201	1.90381	*		884.415	100.99	8.75746	3.13051	***		884.415	377.906	2.34031	1.2267	*		884.415	1975.22	0.447756	-1.15921		*
-	-	-	-	-	57.9197	3.04603	19.0148	4.24905	***		135.366	3.04603	44.4399	5.47378	***		135.366	57.9197	2.33712	1.22473	*		135.366	2142.52	0.0631804	-3.98438		***
WBP5	WW domain-binding protein 5 (WBP-5). [Source:Uniprot/SWISSPROT;Acc:Q9UHQ7]	-	GO:0005515-protein binding;GO:0050699-WW domain binding	-	234.536	71.2663	3.29098	1.71852	*		548.108	71.2663	7.69098	2.94317	**		548.108	234.536	2.33699	1.22465	*		548.108	999.167	0.548565	-0.866266
RPL10	60S ribosomal protein L10 (QM protein) (Tumor suppressor QM) (Laminin receptor homolog). [Source:Uniprot/SWISSPROT;Acc:P27635]	-	-	-	5295.79	3469.93	1.52619	0.609939			12359.8	3469.93	3.56198	1.83268	*		12359.8	5295.79	2.3339	1.22274	*		12359.8	10604.2	1.16556	0.221024
CLIC1	Chloride intracellular channel protein 1 (Nuclear chloride ion channel 27) (NCC27) (Chloride channel ABP) (Regulatory nuclear chloride ion channel protein) (hRNCC). [Source:Uniprot/SWISSPROT;Acc:O00299]	GO:0006811-ion transport;GO:0006821-chloride transport;GO:0007165-signal transduction	GO:0005247-voltage-gated chloride channel activity;GO:0005515-protein binding;GO:0031404-chloride ion binding	GO:0005624-membrane fraction;GO:0005625-soluble fraction;GO:0005634-nucleus;GO:0005635-nuclear envelope;GO:0005737-cytoplasm;GO:0005903-brush border;GO:0016020-membrane	47.9001	3.716	12.8903	3.68821	***		111.683	3.716	30.0546	4.90951	***		111.683	47.9001	2.33158	1.22131	*		111.683	838.929	0.133125	-2.90914		**
MTHFD1	C-1-tetrahydrofolate synthase, cytoplasmic (C1-THF synthase) [Includes: Methylenetetrahydrofolate dehydrogenase (EC 1.5.1.5); Methenyltetrahydrofolate cyclohydrolase (EC 3.5.4.9); Formyltetrahydrofolate synthetase (EC 6.3.4.3)]. [Source:Uniprot/SWISSPROT;Acc:P11586]	GO:0000105-histidine biosynthetic process;GO:0006164-purine nucleotide biosynthetic process;GO:0006548-histidine catabolic process;GO:0006730-one-carbon compound metabolic process;GO:0008652-amino acid biosynthetic process;GO:0009086-methionine biosynthetic process;GO:0009396-folic acid and derivative biosynthetic process	GO:0000166-nucleotide binding;GO:0004329-formate-tetrahydrofolate ligase activity;GO:0004477-methenyltetrahydrofolate cyclohydrolase activity;GO:0004488-methylenetetrahydrofolate dehydrogenase (NADP+) activity;GO:0005515-protein binding;GO:0005524-ATP binding;GO:0016155-formyltetrahydrofolate dehydrogenase activity;GO:0016491-oxidoreductase activity;GO:0016787-hydrolase activity;GO:0016874-ligase…	GO:0005739-mitochondrion	16.7824	2.45303	6.84149	2.77431	**		39.0455	2.45303	15.9172	3.99252	***		39.0455	16.7824	2.32657	1.21821	*		39.0455	206.191	0.189366	-2.40075		**
XP_495885.1	-	-	-	-	1178.91	248.631	4.74162	2.24538	**		2740.96	248.631	11.0242	3.46261	***		2740.96	1178.91	2.32499	1.21723	*		2740.96	11674.9	0.234774	-2.09066		**
SOD1	Superoxide dismutase [Cu-Zn] (EC 1.15.1.1). [Source:Uniprot/SWISSPROT;Acc:P00441]	GO:0006801-superoxide metabolic process;GO:0006979-response to oxidative stress;GO:0007399-nervous system development	GO:0004785-copper, zinc superoxide dismutase activity;GO:0005507-copper ion binding;GO:0008270-zinc ion binding;GO:0016209-antioxidant activity;GO:0016491-oxidoreductase activity;GO:0046872-metal ion binding	GO:0005737-cytoplasm	14.2324	2.67356	5.3234	2.41235	**		33.0566	2.67356	12.3643	3.6281	***		33.0566	14.2324	2.32262	1.21576	*		33.0566	877.267	0.0376813	-4.73001		***
DDX48	Probable ATP-dependent RNA helicase DDX48 (EC 3.6.1.-) (DEAD box protein 48) (Eukaryotic initiation factor 4A-like NUK-34) (Nuclear matrix protein 265) (hNMP 265) (Eukaryotic translation initiation factor 4A isoform 3). [Source:Uniprot/SWISSPROT;Acc:P38919]	GO:0000184-mRNA catabolic process, nonsense-mediated decay;GO:0006364-rRNA processing;GO:0006397-mRNA processing;GO:0008380-RNA splicing	GO:0000166-nucleotide binding;GO:0003723-RNA binding;GO:0005515-protein binding;GO:0005524-ATP binding;GO:0008026-ATP-dependent helicase activity;GO:0016787-hydrolase activity	GO:0005634-nucleus;GO:0005681-spliceosome	302.107	133.865	2.25679	1.17427	*		700.873	133.865	5.23565	2.38837	**		700.873	302.107	2.31995	1.2141	*		700.873	1004.57	0.697684	-0.519354
PIGF	Phosphatidylinositol-glycan biosynthesis class F protein (PIG-F) (GPI11 homolog). [Source:Uniprot/SWISSPROT;Acc:Q07326]	GO:0006506-GPI anchor biosynthetic process	GO:0004307-ethanolaminephosphotransferase activity;GO:0005515-protein binding	GO:0005783-endoplasmic reticulum;GO:0005789-endoplasmic reticulum membrane;GO:0016020-membrane;GO:0016021-integral to membrane	48.3844	14.5373	3.32829	1.73478	*		112.223	14.5373	7.71965	2.94854	**		112.223	48.3844	2.3194	1.21375	*		112.223	199.929	0.561313	-0.833122
-	60S ribosomal protein L32. [Source:Uniprot/SWISSPROT;Acc:P62910]	GO:0006412-translation	GO:0003735-structural constituent of ribosome;GO:0005515-protein binding	GO:0005622-intracellular;GO:0005840-ribosome	285.169	51.2161	5.56796	2.47715	**		660.947	51.2161	12.9051	3.68987	***		660.947	285.169	2.31774	1.21272	*		660.947	3270.25	0.202109	-2.3068		**
C9orf119	C9orf119 protein (OTTHUMP00000022228) (Fragment). [Source:Uniprot/SPTREMBL;Acc:Q8N2W6]	-	-	-	61.236	13.3115	4.60022	2.2017	**		141.92	13.3115	10.6614	3.41433	***		141.92	61.236	2.31759	1.21263	*		141.92	225.671	0.628881	-0.669142
XP_495912.1	ribosomal protein S6 pseudogene 1 (RPS6P1), mRNA [Source:RefSeq_dna;Acc:XR_016837]	-	-	-	19.6551	2.713	7.24479	2.85694	**		45.5462	2.713	16.7881	4.06937	***		45.5462	19.6551	2.31727	1.21243	*		45.5462	4669.52	0.00975393	-6.6798		***
Q9NVB8_HUMAN	CDNA FLJ10824 fis, clone NT2RP4001086. (Fragment). [Source:Uniprot/SPTREMBL;Acc:Q9NVB8]	-	-	-	29.9883	23.206	1.29227	0.369907			69.4161	23.206	2.9913	1.58077	*		69.4161	29.9883	2.31477	1.21087	*		69.4161	88.613	0.783362	-0.352248
DIABLO	Diablo homolog, mitochondrial precursor (Second mitochondria-derived activator of caspase) (Smac protein) (Direct IAP-binding protein with low pI). [Source:Uniprot/SWISSPROT;Acc:Q9NR28]	GO:0006915-apoptosis;GO:0006917-induction of apoptosis;GO:0008625-induction of apoptosis via death domain receptors;GO:0008631-induction of apoptosis by oxidative stress;GO:0008635-caspase activation via cytochrome c	GO:0005515-protein binding	GO:0005737-cytoplasm;GO:0005739-mitochondrion	13.577	7.61275	1.78346	0.834676			31.3652	7.61275	4.12009	2.04268	**		31.3652	13.577	2.31017	1.208	*		31.3652	142.323	0.22038	-2.18193		**
-	CDNA FLJ46018 fis, clone SPLEN2017999. [Source:Uniprot/SPTREMBL;Acc:Q6ZRX2]	-	-	-	634.293	539.848	1.17495	0.232596			1464.35	539.848	2.71252	1.43963	*		1464.35	634.293	2.30863	1.20704	*		1464.35	1941.49	0.754236	-0.406911
SIVA_HUMAN	Apoptosis regulatory protein Siva (CD27-binding protein) (CD27BP). [Source:Uniprot/SWISSPROT;Acc:O15304]	GO:0006915-apoptosis;GO:0006917-induction of apoptosis	GO:0001618-viral receptor activity;GO:0005175-CD27 receptor binding;GO:0005515-protein binding;GO:0008270-zinc ion binding;GO:0046872-metal ion binding	GO:0005634-nucleus;GO:0005737-cytoplasm	171.885	129.204	1.33033	0.411789			396.489	129.204	3.06871	1.61763	*		396.489	171.885	2.30672	1.20584	*		396.489	165.18	2.40035	1.26324	*
CROCC	Rootletin (Ciliary rootlet coiled-coil protein). [Source:Uniprot/SWISSPROT;Acc:Q5TZA2]	GO:0007049-cell cycle;GO:0051297-centrosome organization and biogenesis	GO:0005198-structural molecule activity;GO:0019894-kinesin binding	GO:0005814-centriole;GO:0035253-ciliary rootlet	23.8434	22.0537	1.08115	0.112568			54.9713	22.0537	2.49261	1.31766	*		54.9713	23.8434	2.30551	1.20509	*		54.9713	17.6177	3.12023	1.64165	*
ALG5	Dolichyl-phosphate beta-glucosyltransferase (EC 2.4.1.117) (DolP- glucosyltransferase). [Source:Uniprot/SWISSPROT;Acc:Q9Y673]	GO:0006486-protein amino acid glycosylation;GO:0007368-determination of left/right symmetry	GO:0004576-oligosaccharyl transferase activity;GO:0004581-dolichyl-phosphate beta-glucosyltransferase activity;GO:0016757-transferase activity, transferring glycosyl groups	GO:0005783-endoplasmic reticulum;GO:0016020-membrane;GO:0016021-integral to membrane	136.495	38.3244	3.56158	1.83252	*		314.651	38.3244	8.21021	3.03742	***		314.651	136.495	2.30521	1.2049	*		314.651	761.779	0.413047	-1.27562		*
SSR4	Translocon-associated protein subunit delta precursor (TRAP-delta) (Signal sequence receptor subunit delta) (SSR-delta). [Source:Uniprot/SWISSPROT;Acc:P51571]	GO:0006886-intracellular protein transport	GO:0005509-calcium ion binding	GO:0005783-endoplasmic reticulum;GO:0005784-translocon complex;GO:0016020-membrane;GO:0016021-integral to membrane	11.969	3.54232	3.37886	1.75654	*		27.5429	3.54232	7.7754	2.95892	**		27.5429	11.969	2.30119	1.20238	*		27.5429	545.412	0.0504993	-4.30759		***
NP_006638.1	NADPH oxidase activator 1 [Source:RefSeq_peptide;Acc:NP_006638]	-	GO:0005488-binding	-	29.7287	26.2286	1.13344	0.180712			68.2771	26.2286	2.60315	1.38026	*		68.2771	29.7287	2.29668	1.19955	*		68.2771	5.8492	11.6729	3.54509	***
XP_377444.2	-	-	-	-	9.38901	2.07315	4.52885	2.17915	**		21.4512	2.07315	10.3471	3.37116	***		21.4512	9.38901	2.28471	1.19201	*		21.4512	766.146	0.0279988	-5.15849		***
CCT4	T-complex protein 1 subunit delta (TCP-1-delta) (CCT-delta) (Stimulator of TAR RNA-binding). [Source:Uniprot/SWISSPROT;Acc:P50991]	GO:0000074-regulation of progression through cell cycle;GO:0006457-protein folding	GO:0000166-nucleotide binding;GO:0005524-ATP binding;GO:0051082-unfolded protein binding	GO:0005737-cytoplasm	31.3406	7.52536	4.16467	2.0582	**		71.3752	7.52536	9.48462	3.24559	***		71.3752	31.3406	2.2774	1.18739	*		71.3752	765.158	0.0932816	-3.42226		***
TCF3	Transcription factor E2-alpha (Immunoglobulin enhancer-binding factor E12/E47) (Transcription factor 3) (TCF-3) (Immunoglobulin transcription factor 1) (Transcription factor ITF-1) (Kappa-E2-binding factor). [Source:Uniprot/SWISSPROT;Acc:P15923]	GO:0002326-B cell lineage commitment;GO:0045449-regulation of transcription;GO:0045893-positive regulation of transcription, DNA-dependent	GO:0003700-transcription factor activity;GO:0005515-protein binding;GO:0030528-transcription regulator activity;GO:0042803-protein homodimerization activity;GO:0046982-protein heterodimerization activity	GO:0005634-nucleus;GO:0005667-transcription factor complex	100.913	76.4191	1.32052	0.401104			229.759	76.4191	3.00656	1.58811	*		229.759	100.913	2.27681	1.18701	*		229.759	66.008	3.48077	1.79941	*
AHCY	Adenosylhomocysteinase (EC 3.3.1.1) (S-adenosyl-L-homocysteine hydrolase) (AdoHcyase). [Source:Uniprot/SWISSPROT;Acc:P23526]	GO:0006730-one-carbon compound metabolic process	GO:0004013-adenosylhomocysteinase activity;GO:0005515-protein binding;GO:0016787-hydrolase activity	GO:0005737-cytoplasm	20.4131	4.27054	4.77999	2.25701	**		46.4326	4.27054	10.8728	3.44265	***		46.4326	20.4131	2.27464	1.18564	*		46.4326	379.782	0.122261	-3.03196		***
SDF2L1	Stromal cell-derived factor 2-like protein 1 precursor (SDF2-like protein 1) (PWP1-interacting protein 8). [Source:Uniprot/SWISSPROT;Acc:Q9HCN8]	-	GO:0016787-hydrolase activity	GO:0016020-membrane	11.5931	6.17272	1.87812	0.90929			26.3348	6.17272	4.26631	2.09299	**		26.3348	11.5931	2.27158	1.1837	*		26.3348	32.3092	0.815085	-0.294977
-	type 1 tumor necrosis factor receptor shedding aminopeptidase regulator	1525 // angiogenesis // traceable author statement /// 6509 // membrane protein ectodomain proteolysis // inferred from direct assay /// 8217 // blood pressure regulation // non-traceable author statement /// 19885 // antigen processing, endogenous antige	5576 // extracellular region // inferred from direct assay /// 5783 // endoplasmic reticulum // non-traceable author statement /// 5788 // endoplasmic reticulum lumen // traceable author statement /// 5829 // cytosol // non-traceable author statement ///	4178 // leucyl aminopeptidase activity // inferred from direct assay /// 4179 // membrane alanyl aminopeptidase activity // inferred from electronic annotation /// 4239 // methionyl aminopeptidase activity // non-traceable author statement /// 5138 // int	58.1786	31.2803	1.85991	0.895232			131.988	31.2803	4.21953	2.07708	**		131.988	58.1786	2.26868	1.18185	*		131.988	234.579	0.562662	-0.82966
STMN1	Stathmin (Phosphoprotein p19) (pp19) (Oncoprotein 18) (Op18) (Leukemia-associated phosphoprotein p18) (pp17) (Prosolin) (Metablastin) (Protein Pr22). [Source:Uniprot/SWISSPROT;Acc:P16949]	GO:0007019-microtubule depolymerization;GO:0007052-mitotic spindle organization and biogenesis;GO:0007242-intracellular signaling cascade;GO:0007275-multicellular organismal development;GO:0007399-nervous system development;GO:0030154-cell differentiation	GO:0004871-signal transducer activity;GO:0005515-protein binding;GO:0015631-tubulin binding	GO:0005622-intracellular;GO:0005737-cytoplasm;GO:0005829-cytosol;GO:0005874-microtubule	17.2927	7.98121	2.16668	1.11548	*		39.1933	7.98121	4.91069	2.29593	**		39.1933	17.2927	2.26646	1.18044	*		39.1933	51.1886	0.765663	-0.385219
CCT8	T-complex protein 1 subunit theta (TCP-1-theta) (CCT-theta) (Renal carcinoma antigen NY-REN-15). [Source:Uniprot/SWISSPROT;Acc:P50990]	GO:0006457-protein folding	GO:0000166-nucleotide binding;GO:0005524-ATP binding;GO:0042623-ATPase activity, coupled;GO:0051082-unfolded protein binding	GO:0005829-cytosol	71.4761	11.4597	6.23717	2.64089	**		161.849	11.4597	14.1233	3.82001	***		161.849	71.4761	2.26438	1.17912	*		161.849	786.694	0.205733	-2.28115		**
GRHPR	Glyoxylate reductase/hydroxypyruvate reductase (EC 1.1.1.79). [Source:Uniprot/SWISSPROT;Acc:Q9UBQ7]	GO:0006118-electron transport;GO:0007588-excretion;GO:0008152-metabolic process	GO:0005515-protein binding;GO:0008465-glycerate dehydrogenase activity;GO:0016491-oxidoreductase activity;GO:0016616-oxidoreductase activity, acting on the CH-OH group of donors, NAD or NADP as acceptor;GO:0016618-hydroxypyruvate reductase activity;GO:0030267-glyoxylate reductase (NADP) activity;GO:0048037-cofactor binding;GO:0051287-NAD binding	GO:0005575-cellular_component;GO:0005737-cytoplasm	14.5502	5.24558	2.77381	1.47187	*		32.7985	5.24558	6.2526	2.64446	**		32.7985	14.5502	2.25416	1.17259	*		32.7985	279.88	0.117188	-3.09311		***
WDR18	WD repeat protein 18. [Source:Uniprot/SWISSPROT;Acc:Q9BV38]	-	-	-	40.5852	28.6475	1.41671	0.502542			91.4834	28.6475	3.19341	1.6751	*		91.4834	40.5852	2.25411	1.17256	*		91.4834	28.3903	3.22235	1.68811	*
YY1	Transcriptional repressor protein YY1 (Yin and yang 1) (YY-1) (Delta transcription factor) (NF-E1). [Source:Uniprot/SWISSPROT;Acc:P25490]	GO:0006350-transcription;GO:0006357-regulation of transcription from RNA polymerase II promoter;GO:0009952-anterior/posterior pattern formation	GO:0003700-transcription factor activity;GO:0003713-transcription coactivator activity;GO:0003714-transcription corepressor activity;GO:0005515-protein binding;GO:0008270-zinc ion binding;GO:0046872-metal ion binding	GO:0005622-intracellular;GO:0005634-nucleus;GO:0005667-transcription factor complex;GO:0031519-PcG protein complex	73.2749	20.3579	3.59934	1.84773	*		164.683	20.3579	8.08942	3.01604	***		164.683	73.2749	2.24747	1.1683	*		164.683	369.342	0.445883	-1.16526		*
XP_377060.1	-	-	-	-	46.1998	17.8451	2.58894	1.37236	*		103.682	17.8451	5.81009	2.53856	**		103.682	46.1998	2.2442	1.1662	*		103.682	412.308	0.251466	-1.99156		*
XP_372778.2	-	GO:0006412-translation	GO:0003735-structural constituent of ribosome	GO:0005622-intracellular;GO:0005840-ribosome	2195.35	706.358	3.10798	1.63598	*		4916.77	706.358	6.96073	2.79924	**		4916.77	2195.35	2.23963	1.16326	*		4916.77	12614.9	0.38976	-1.35934		*
HPS6_HUMAN	Hermansky-Pudlak syndrome 6 protein (Ruby-eye protein homolog) (Ru). [Source:Uniprot/SWISSPROT;Acc:Q86YV9]	GO:0006996-organelle organization and biogenesis;GO:0030318-melanocyte differentiation;GO:0043473-pigmentation	GO:0005515-protein binding	-	21.5037	9.18702	2.34066	1.22692	*		48.1597	9.18702	5.24214	2.39016	**		48.1597	21.5037	2.2396	1.16324	*		48.1597	62.0612	0.776002	-0.365867
-	-	-	-	-	257.317	74.1624	3.46964	1.79479	*		575.301	74.1624	7.75732	2.95556	**		575.301	257.317	2.23577	1.16077	*		575.301	360.356	1.59648	0.674895
-	60S ribosomal protein L27a. [Source:Uniprot/SWISSPROT;Acc:P46776]	GO:0006412-translation	GO:0003735-structural constituent of ribosome	GO:0005622-intracellular;GO:0005840-ribosome	1661.72	523.678	3.17318	1.66593	*		3708.38	523.678	7.08141	2.82404	**		3708.38	1661.72	2.23165	1.15811	*		3708.38	9643.72	0.384538	-1.3788		*
PARP4	Poly [ADP-ribose] polymerase 4 (EC 2.4.2.30) (PARP-4) (Vault poly(ADP- ribose) polymerase) (VPARP) (193 kDa vault protein) (PARP- related/IalphaI-related H5/proline-rich) (PH5P). [Source:Uniprot/SWISSPROT;Acc:Q9UKK3]	GO:0006281-DNA repair;GO:0006464-protein modification;GO:0006471-protein amino acid ADP-ribosylation;GO:0006810-transport;GO:0006954-inflammatory response;GO:0008219-cell death;GO:0042493-response to drug	GO:0003677-DNA binding;GO:0003950-NAD+ ADP-ribosyltransferase activity;GO:0016757-transferase activity, transferring glycosyl groups;GO:0019899-enzyme binding	GO:0005622-intracellular;GO:0005634-nucleus;GO:0030529-ribonucleoprotein complex	9.8096	3.0814	3.18349	1.67061	*		21.8508	3.0814	7.09118	2.82603	**		21.8508	9.8096	2.22749	1.15542	*		21.8508	432.366	0.0505377	-4.3065		***
-	Protein ZNF783. [Source:Uniprot/SWISSPROT;Acc:Q6ZMS7]	-	-	-	54.9133	20.9836	2.61697	1.3879	*		122.026	20.9836	5.81532	2.53986	**		122.026	54.9133	2.22216	1.15196	*		122.026	137.079	0.890186	-0.167821
ARL6IP5	PRA1 family protein 3 (ARL-6-interacting protein 5) (ADP-ribosylation- like factor 6-interacting protein 5) (Aip-5) (Glutamate transporter EAAC1-interacting protein) (GTRAP3-18) (Prenylated Rab acceptor protein 2) (Protein JWa) (Dermal papilla-derived pro [Source:Uniprot/SWISSPROT;Acc:O75915]	GO:0015813-glutamate transport	GO:0005515-protein binding	GO:0005783-endoplasmic reticulum;GO:0016020-membrane;GO:0016021-integral to membrane	223.549	97.5741	2.29107	1.19602	*		496.614	97.5741	5.08961	2.34756	**		496.614	223.549	2.2215	1.15153	*		496.614	759.968	0.653467	-0.613813
ATPIF1	ATPase inhibitor, mitochondrial precursor. [Source:Uniprot/SWISSPROT;Acc:Q9UII2]	GO:0001525-angiogenesis;GO:0001937-negative regulation of endothelial cell proliferation;GO:0006091-generation of precursor metabolites and energy;GO:0009268-response to pH;GO:0045980-negative regulation of nucleotide metabolic process;GO:0051289-protein homotetramerization;GO:0051346-negative regulation of hydrolase activity	GO:0004857-enzyme inhibitor activity;GO:0005516-calmodulin binding;GO:0042030-ATPase inhibitor activity;GO:0042803-protein homodimerization activity;GO:0043532-angiostatin binding;GO:0051117-ATPase binding	GO:0005739-mitochondrion;GO:0009986-cell surface	234.209	51.2173	4.57285	2.19309	**		520.186	51.2173	10.1564	3.34432	***		520.186	234.209	2.22103	1.15123	*		520.186	2061.01	0.252394	-1.98625		*
DET1_HUMAN	DET1 homolog (De-etiolated-1 homolog). [Source:Uniprot/SWISSPROT;Acc:Q7L5Y6]	GO:0006512-ubiquitin cycle	-	GO:0005634-nucleus	17.8434	15.3354	1.16355	0.218527			39.4887	15.3354	2.57501	1.36458	*		39.4887	17.8434	2.21307	1.14605	*		39.4887	64.4397	0.6128	-0.706511
ABCB6	Mitochondrial ATP-binding cassette sub-family B member 6 (Mitochondrial ABC transporter 3) (Mt-ABC transporter 3) (Ubiquitously expressed mammalian ABC half transporter) (P-glycoprotein-related protein). [Source:Uniprot/SWISSPROT;Acc:Q9NP58]	GO:0006810-transport;GO:0006879-iron ion homeostasis	GO:0000166-nucleotide binding;GO:0005524-ATP binding;GO:0016887-ATPase activity;GO:0042626-ATPase activity, coupled to transmembrane movement of substances	GO:0005739-mitochondrion;GO:0005740-mitochondrial envelope;GO:0016020-membrane;GO:0016021-integral to membrane;GO:0019867-outer membrane;GO:0043190-ATP-binding cassette (ABC) transporter complex	38.3514	11.161	3.43618	1.78081	*		84.841	11.161	7.60153	2.92629	**		84.841	38.3514	2.2122	1.14548	*		84.841	152.288	0.557108	-0.843972
-	Nucleophosmin (NPM) (Nucleolar phosphoprotein B23) (Numatrin) (Nucleolar protein NO38). [Source:Uniprot/SWISSPROT;Acc:P06748]	GO:0006886-intracellular protein transport;GO:0006913-nucleocytoplasmic transport;GO:0006916-anti-apoptosis;GO:0006950-response to stress;GO:0007098-centrosome cycle;GO:0007165-signal transduction;GO:0007569-cell aging;GO:0008285-negative regulation of cell proliferation;GO:0042255-ribosome assembly;GO:0051092-activation of NF-kappaB transcription factor	GO:0003713-transcription coactivator activity;GO:0003723-RNA binding;GO:0030957-Tat protein binding;GO:0042803-protein homodimerization activity;GO:0046982-protein heterodimerization activity;GO:0051059-NF-kappaB binding;GO:0051082-unfolded protein binding	GO:0005634-nucleus;GO:0005730-nucleolus;GO:0005737-cytoplasm;GO:0005813-centrosome	12.6504	5.00525	2.52743	1.33767	*		27.974	5.00525	5.58894	2.48257	**		27.974	12.6504	2.21131	1.1449	*		27.974	794.789	0.0351968	-4.82841		***
PSCD1	Cytohesin-1 (PH, SEC7 and coiled-coil domain-containing protein 1) (SEC7 homolog B2-1). [Source:Uniprot/SWISSPROT;Acc:Q15438]	GO:0016192-vesicle-mediated transport;GO:0030155-regulation of cell adhesion;GO:0032012-regulation of ARF protein signal transduction	GO:0005086-ARF guanyl-nucleotide exchange factor activity;GO:0005515-protein binding	GO:0005622-intracellular;GO:0005737-cytoplasm;GO:0005886-plasma membrane	10.5851	5.85228	1.80871	0.854962			23.3853	5.85228	3.99593	1.99853	*		23.3853	10.5851	2.20927	1.14357	*		23.3853	22.5649	1.03635	0.0515163
DDX50	ATP-dependent RNA helicase DDX50 (EC 3.6.1.-) (DEAD box protein 50) (Nucleolar protein Gu2) (Gu-beta). [Source:Uniprot/SWISSPROT;Acc:Q9BQ39]	-	GO:0000166-nucleotide binding;GO:0003676-nucleic acid binding;GO:0003723-RNA binding;GO:0005524-ATP binding;GO:0008026-ATP-dependent helicase activity;GO:0016787-hydrolase activity	GO:0005634-nucleus	14.0593	8.033	1.75019	0.807514			31.0088	8.033	3.86018	1.94867	*		31.0088	14.0593	2.20557	1.14115	*		31.0088	328.285	0.094457	-3.4042		***
FEM1B	fem-1 homolog b [Source:RefSeq_peptide;Acc:NP_056137]	-	-	-	12.7158	2.67362	4.75604	2.24976	**		27.9716	2.67362	10.4621	3.3871	***		27.9716	12.7158	2.19974	1.13733	*		27.9716	144.47	0.193615	-2.36873		**
ATP5A1	ATP synthase subunit alpha, mitochondrial precursor (EC 3.6.3.14). [Source:Uniprot/SWISSPROT;Acc:P25705]	GO:0006811-ion transport;GO:0015986-ATP synthesis coupled proton transport;GO:0015992-proton transport	GO:0000166-nucleotide binding;GO:0005215-transporter activity;GO:0005515-protein binding;GO:0005524-ATP binding;GO:0016787-hydrolase activity;GO:0016820-hydrolase activity, acting on acid anhydrides, catalyzing transmembrane movement of substances;GO:0046872-metal ion binding;GO:0046933-hydrogen ion transporting ATP synthase activity, rotational mechanism;GO:0046961-hydrogen ion transporting ATPa…	GO:0005624-membrane fraction;GO:0005739-mitochondrion;GO:0005753-mitochondrial proton-transporting ATP synthase complex;GO:0016469-proton-transporting two-sector ATPase complex;GO:0045261-proton-transporting ATP synthase complex, catalytic core F(1)	260.748	47.406	5.50031	2.45951	**		573.426	47.406	12.0961	3.59647	***		573.426	260.748	2.19916	1.13695	*		573.426	4288.94	0.133699	-2.90294		**
HSD17B8	Estradiol 17-beta-dehydrogenase 8 (EC 1.1.1.62) (17-beta-HSD 8) (17- beta-hydroxysteroid dehydrogenase 8) (Protein Ke6) (Ke-6). [Source:Uniprot/SWISSPROT;Acc:Q92506]	GO:0006703-estrogen biosynthetic process;GO:0008152-metabolic process;GO:0008209-androgen metabolic process	GO:0004303-estradiol 17-beta-dehydrogenase activity;GO:0016491-oxidoreductase activity;GO:0050327-testosterone 17-beta-dehydrogenase activity	GO:0005575-cellular_component;GO:0005624-membrane fraction;GO:0005739-mitochondrion;GO:0005740-mitochondrial envelope;GO:0005886-plasma membrane	16.9905	4.52143	3.75777	1.90988	*		37.364	4.52143	8.26375	3.0468	***		37.364	16.9905	2.19911	1.13692	*		37.364	121.142	0.30843	-1.69698		*
NM_020360.2	Phospholipid scramblase 3 (PL scramblase 3) (Ca(2+)-dependent phospholipid scramblase 3). [Source:Uniprot/SWISSPROT;Acc:Q9NRY6]	GO:0017121-phospholipid scrambling;GO:0042593-glucose homeostasis;GO:0042632-cholesterol homeostasis	GO:0005509-calcium ion binding;GO:0017128-phospholipid scramblase activity	GO:0005886-plasma membrane;GO:0016021-integral to membrane	41.6306	13.9181	2.99111	1.58068	*		91.4247	13.9181	6.56876	2.71562	**		91.4247	41.6306	2.19609	1.13494	*		91.4247	72.757	1.25658	0.329498
MORF4L1	Mortality factor 4-like protein 1 (MORF-related gene 15 protein) (Transcription factor-like protein MRG15) (MSL3-1 protein). [Source:Uniprot/SWISSPROT;Acc:Q9UBU8]	GO:0001558-regulation of cell growth;GO:0006350-transcription;GO:0006355-regulation of transcription, DNA-dependent;GO:0016568-chromatin modification	GO:0005515-protein binding	GO:0005634-nucleus	27.9399	8.76123	3.18904	1.67312	*		61.2011	8.76123	6.98545	2.80435	**		61.2011	27.9399	2.19046	1.13123	*		61.2011	73.8868	0.82831	-0.271758
PCDHGA8	Protocadherin gamma A12 precursor (PCDH-gamma-A12) (Cadherin-21) (Fibroblast cadherin 3). [Source:Uniprot/SWISSPROT;Acc:O60330]	GO:0007155-cell adhesion;GO:0007156-homophilic cell adhesion	GO:0005509-calcium ion binding;GO:0005515-protein binding	GO:0016020-membrane;GO:0016021-integral to membrane	58.7942	59.8276	0.982727	-0.0251381			128.674	59.8276	2.15074	1.10483	*		128.674	58.7942	2.18854	1.12997	*		128.674	40.6462	3.16569	1.66252	*
SDHB	Succinate dehydrogenase [ubiquinone] iron-sulfur protein, mitochondrial precursor (EC 1.3.5.1) (Ip) (Iron-sulfur subunit of complex II). [Source:Uniprot/SWISSPROT;Acc:P21912]	GO:0006099-tricarboxylic acid cycle;GO:0006118-electron transport;GO:0006810-transport	GO:0005506-iron ion binding;GO:0008177-succinate dehydrogenase (ubiquinone) activity;GO:0009055-electron carrier activity;GO:0046872-metal ion binding;GO:0051537-2 iron, 2 sulfur cluster binding;GO:0051538-3 iron, 4 sulfur cluster binding;GO:0051539-4 iron, 4 sulfur cluster binding	GO:0005739-mitochondrion;GO:0005743-mitochondrial inner membrane;GO:0016020-membrane	51.991	5.44444	9.54938	3.25541	***		113.768	5.44444	20.8963	4.38517	***		113.768	51.991	2.18823	1.12977	*		113.768	469.323	0.24241	-2.04448		**
ACTB_HUMAN	Actin, cytoplasmic 1 (Beta-actin). [Source:Uniprot/SWISSPROT;Acc:P60709]	GO:0006928-cell motility;GO:0007605-sensory perception of sound	GO:0000166-nucleotide binding;GO:0005200-structural constituent of cytoskeleton;GO:0005515-protein binding;GO:0005524-ATP binding	GO:0005625-soluble fraction;GO:0005737-cytoplasm;GO:0005829-cytosol;GO:0005856-cytoskeleton;GO:0035267-NuA4 histone acetyltransferase complex	55.6183	21.4733	2.59011	1.37301	*		121.665	21.4733	5.66585	2.50229	**		121.665	55.6183	2.18749	1.12928	*		121.665	150.144	0.810321	-0.303434
SERPINB1	Leukocyte elastase inhibitor (LEI) (Serpin B1) (Monocyte/neutrophil elastase inhibitor) (M/NEI) (EI). [Source:Uniprot/SWISSPROT;Acc:P30740]	-	GO:0004867-serine-type endopeptidase inhibitor activity	GO:0005737-cytoplasm	13.0986	5.4142	2.4193	1.27459	*		28.6425	5.4142	5.29025	2.40334	**		28.6425	13.0986	2.18669	1.12875	*		28.6425	339.004	0.0844902	-3.56507		***
UBXD1	UBX domain-containing protein 1. [Source:Uniprot/SWISSPROT;Acc:Q9BZV1]	GO:0008150-biological_process	GO:0003674-molecular_function	GO:0005575-cellular_component	24.9719	23.9998	1.0405	0.0572799			54.5144	23.9998	2.27145	1.18361	*		54.5144	24.9719	2.18303	1.12633	*		54.5144	13.3652	4.07884	2.02816	**
NP_149079.2	Protein FAM40A. [Source:Uniprot/SWISSPROT;Acc:Q5VSL9]	-	-	-	10.4527	4.66697	2.23971	1.16331	*		22.8116	4.66697	4.88789	2.28921	**		22.8116	10.4527	2.18237	1.1259	*		22.8116	64.9509	0.351213	-1.50958		*
PHPT1	14 kDa phosphohistidine phosphatase (EC 3.1.3.-) (Phosphohistidine phosphatase 1) (Protein janus-A homolog). [Source:Uniprot/SWISSPROT;Acc:Q9NRX4]	GO:0016311-dephosphorylation	GO:0004721-phosphoprotein phosphatase activity;GO:0008969-phosphohistidine phosphatase activity;GO:0016787-hydrolase activity	GO:0005737-cytoplasm;GO:0005829-cytosol	36.1413	18.5608	1.94719	0.961391			78.86	18.5608	4.24874	2.08703	**		78.86	36.1413	2.18199	1.12564	*		78.86	58.6271	1.34511	0.427726
CKAP1	Tubulin-specific chaperone B (Tubulin folding cofactor B) (Cytoskeleton-associated protein 1) (Cytoskeleton-associated protein CKAPI). [Source:Uniprot/SWISSPROT;Acc:Q99426]	GO:0006457-protein folding;GO:0007275-multicellular organismal development;GO:0007399-nervous system development;GO:0030154-cell differentiation	GO:0005515-protein binding	GO:0005874-microtubule	26.3066	8.89793	2.95648	1.56388	*		57.3827	8.89793	6.449	2.68907	**		57.3827	26.3066	2.18131	1.12519	*		57.3827	89.7585	0.639301	-0.645432
TPCN2	two pore segment channel 2 [Source:RefSeq_peptide;Acc:NP_620714]	GO:0006811-ion transport;GO:0006816-calcium ion transport	GO:0005216-ion channel activity;GO:0005244-voltage-gated ion channel activity;GO:0005262-calcium channel activity;GO:0005509-calcium ion binding	GO:0016020-membrane;GO:0016021-integral to membrane	14.3927	12.5073	1.15075	0.202575			31.3817	12.5073	2.50908	1.32716	*		31.3817	14.3927	2.18038	1.12458	*		31.3817	18.8948	1.66087	0.731935
RS15_HUMAN	40S ribosomal protein S15 (RIG protein). [Source:Uniprot/SWISSPROT;Acc:P62841]	GO:0006412-translation	GO:0003735-structural constituent of ribosome;GO:0005515-protein binding	GO:0005622-intracellular;GO:0005843-cytosolic small ribosomal subunit (sensu Eukaryota)	6058.24	4158.64	1.45678	0.542787			13195.1	4158.64	3.17294	1.66582	*		13195.1	6058.24	2.17805	1.12303	*		13195.1	3085.98	4.27583	2.0962	**
-	Thymosin beta-4 (T beta 4) (Fx) [Contains: Hematopoietic system regulatory peptide (Seraspenide)]. [Source:Uniprot/SWISSPROT;Acc:P62328]	GO:0007010-cytoskeleton organization and biogenesis	GO:0003779-actin binding	GO:0005737-cytoplasm;GO:0005856-cytoskeleton	105.688	9.06648	11.657	3.54313	***		230.036	9.06648	25.3722	4.66517	***		230.036	105.688	2.17655	1.12204	*		230.036	2265.71	0.101529	-3.30003		***
AXIN1	Axin-1 (Axis inhibition protein 1) (hAxin). [Source:Uniprot/SWISSPROT;Acc:O15169]	GO:0006915-apoptosis;GO:0007049-cell cycle;GO:0007275-multicellular organismal development;GO:0007309-oocyte axis determination;GO:0007605-sensory perception of sound;GO:0030163-protein catabolic process;GO:0030178-negative regulation of Wnt receptor signaling pathway;GO:0045786-negative regulation of progression through cell cycle;GO:0060070-Wnt receptor signaling pathway through beta-catenin	GO:0004871-signal transducer activity;GO:0005515-protein binding	GO:0005622-intracellular;GO:0005634-nucleus;GO:0005737-cytoplasm;GO:0016023-cytoplasmic membrane-bound vesicle;GO:0016328-lateral plasma membrane;GO:0030877-beta-catenin destruction complex	33.0913	15.4199	2.14601	1.10166	*		71.9859	15.4199	4.66838	2.22292	**		71.9859	33.0913	2.17537	1.12126	*		71.9859	70.7883	1.01692	0.0242041
SMARCC2	SWI/SNF-related matrix-associated actin-dependent regulator of chromatin subfamily C member 2 (SWI/SNF complex 170 kDa subunit) (BRG1-associated factor 170). [Source:Uniprot/SWISSPROT;Acc:Q8TAQ2]	GO:0006333-chromatin assembly or disassembly;GO:0006338-chromatin remodeling;GO:0006350-transcription;GO:0006357-regulation of transcription from RNA polymerase II promoter;GO:0045892-negative regulation of transcription, DNA-dependent;GO:0045893-positive regulation of transcription, DNA-dependent	GO:0003677-DNA binding;GO:0003682-chromatin binding;GO:0003713-transcription coactivator activity;GO:0005515-protein binding	GO:0000785-chromatin;GO:0005634-nucleus;GO:0005654-nucleoplasm;GO:0016514-SWI/SNF complex;GO:0017053-transcriptional repressor complex	63.4048	33.0365	1.91923	0.94053			137.807	33.0365	4.17135	2.06052	**		137.807	63.4048	2.17345	1.11999	*		137.807	108.177	1.27391	0.349258
ANKRD9	Ankyrin repeat domain-containing protein 9. [Source:Uniprot/SWISSPROT;Acc:Q96BM1]	-	-	-	33.091	21.1313	1.56597	0.64706			71.7508	21.1313	3.39548	1.76362	*		71.7508	33.091	2.16829	1.11656	*		71.7508	12.1363	5.91209	2.56367	**
C6orf70	CDNA FLJ10507 fis, clone NT2RP2000516. (Fragment). [Source:Uniprot/SPTREMBL;Acc:Q9NVU2]	-	-	-	13.1038	2.51019	5.22026	2.38412	**		28.4026	2.51019	11.3149	3.50016	***		28.4026	13.1038	2.1675	1.11603	*		28.4026	188.598	0.150599	-2.73122		**
-	Histone H2B type 1-D (H2B.b) (H2B/b) (H2B.1 B) (HIRA-interacting protein 2). [Source:Uniprot/SWISSPROT;Acc:P58876]	GO:0006334-nucleosome assembly;GO:0007001-chromosome organization and biogenesis (sensu Eukaryota);GO:0042742-defense response to bacterium	GO:0003677-DNA binding;GO:0005515-protein binding	GO:0000786-nucleosome;GO:0005634-nucleus;GO:0005694-chromosome	15.5835	4.4391	3.51052	1.81168	*		33.7204	4.4391	7.59622	2.92528	**		33.7204	15.5835	2.16384	1.1136	*		33.7204	11.0968	3.03874	1.60347	*
PFDN5	Prefoldin subunit 5 (C-myc-binding protein Mm-1) (Myc modulator 1). [Source:Uniprot/SWISSPROT;Acc:Q99471]	GO:0006355-regulation of transcription, DNA-dependent;GO:0006457-protein folding	GO:0003714-transcription corepressor activity;GO:0051082-unfolded protein binding	GO:0005634-nucleus;GO:0005737-cytoplasm;GO:0016272-prefoldin complex	778.729	414.216	1.88001	0.91074			1683.64	414.216	4.06464	2.02313	**		1683.64	778.729	2.16203	1.11239	*		1683.64	1800.81	0.934932	-0.0970664
-	-	-	-	-	159.378	31.0822	5.12763	2.35829	**		344.318	31.0822	11.0777	3.46958	***		344.318	159.378	2.16039	1.11129	*		344.318	1235.91	0.278594	-1.84377		*
-	-	-	-	-	262.675	141.417	1.85745	0.893325			567.182	141.417	4.01072	2.00386	**		567.182	262.675	2.15926	1.11053	*		567.182	2179.46	0.26024	-1.94208		*
UBE2L6	Ubiquitin/ISG15-conjugating enzyme E2 L6 (EC 6.3.2.19) (Ubiquitin- protein ligase L6) (Ubiquitin carrier protein L6) (UbcH8) (Retinoic acid-induced gene B protein) (RIG-B). [Source:Uniprot/SWISSPROT;Acc:O14933]	GO:0006464-protein modification;GO:0006512-ubiquitin cycle;GO:0019941-modification-dependent protein catabolic process;GO:0032020-ISG15-protein conjugation	GO:0004842-ubiquitin-protein ligase activity;GO:0005515-protein binding;GO:0016874-ligase activity;GO:0019787-small conjugating protein ligase activity;GO:0042296-ISG15 conjugating enzyme activity	-	522.941	209.533	2.49574	1.31947	*		1129.03	209.533	5.3883	2.42983	**		1129.03	522.941	2.159	1.11036	*		1129.03	1207.39	0.935101	-0.0968066
FKB1A_HUMAN	FK506-binding protein 1A (EC 5.2.1.8) (Peptidyl-prolyl cis-trans isomerase) (PPIase) (Rotamase) (12 kDa FKBP) (FKBP-12) (Immunophilin FKBP12). [Source:Uniprot/SWISSPROT;Acc:P62942]	GO:0006457-protein folding;GO:0043123-positive regulation of I-kappaB kinase/NF-kappaB cascade	GO:0003755-peptidyl-prolyl cis-trans isomerase activity;GO:0004872-receptor activity;GO:0005515-protein binding;GO:0016853-isomerase activity	-	310.712	216.104	1.43779	0.523855			670.264	216.104	3.10159	1.63301	*		670.264	310.712	2.15719	1.10915	*		670.264	264.532	2.53377	1.34129	*
SUCLG1	Succinyl-CoA ligase [GDP-forming] subunit alpha, mitochondrial precursor (EC 6.2.1.4) (Succinyl-CoA synthetase subunit alpha) (SCS- alpha). [Source:Uniprot/SWISSPROT;Acc:P53597]	GO:0006099-tricarboxylic acid cycle;GO:0008152-metabolic process	GO:0000166-nucleotide binding;GO:0004776-succinate-CoA ligase (GDP-forming) activity;GO:0005525-GTP binding;GO:0016874-ligase activity	GO:0005739-mitochondrion;GO:0005743-mitochondrial inner membrane	58.8837	11.3398	5.19266	2.37647	**		126.913	11.3398	11.1918	3.48437	***		126.913	58.8837	2.15531	1.1079	*		126.913	732.404	0.173283	-2.5288		**
NEDD8	NEDD8 precursor (Ubiquitin-like protein Nedd8) (Neddylin). [Source:Uniprot/SWISSPROT;Acc:Q15843]	GO:0006464-protein modification;GO:0006508-proteolysis;GO:0006511-ubiquitin-dependent protein catabolic process;GO:0006512-ubiquitin cycle;GO:0009653-anatomical structure morphogenesis	GO:0005515-protein binding	GO:0005634-nucleus	587.91	300.057	1.95933	0.97036			1266.98	300.057	4.22248	2.07809	**		1266.98	587.91	2.15506	1.10773	*		1266.98	918.62	1.37923	0.463859
Q9NZ47_HUMAN	Uncharacterized hematopoietic stem/progenitor cells protein MDS027. [Source:Uniprot/SPTREMBL;Acc:Q9NZ47]	-	-	-	14.823	3.58182	4.1384	2.04907	**		31.6922	3.58182	8.84807	3.14536	***		31.6922	14.823	2.13804	1.09629	*		31.6922	25.5483	1.24048	0.310902
CIB1	Calcium and integrin-binding protein 1 (Calmyrin) (DNA-PKcs- interacting protein) (Kinase-interacting protein) (KIP) (CIB) (SNK- interacting protein 2-28) (SIP2-28). [Source:Uniprot/SWISSPROT;Acc:Q99828]	GO:0006302-double-strand break repair;GO:0006915-apoptosis;GO:0006974-response to DNA damage stimulus;GO:0007155-cell adhesion	GO:0005509-calcium ion binding;GO:0005515-protein binding	GO:0005654-nucleoplasm;GO:0005737-cytoplasm;GO:0005783-endoplasmic reticulum;GO:0016020-membrane	20.996	7.63571	2.7497	1.45928	*		44.8758	7.63571	5.87709	2.5551	**		44.8758	20.996	2.13735	1.09583	*		44.8758	269.51	0.166509	-2.58633		**
SFRS11	Splicing factor arginine/serine-rich 11 (Arginine-rich 54 kDa nuclear protein) (p54). [Source:Uniprot/SWISSPROT;Acc:Q05519]	GO:0006397-mRNA processing;GO:0008380-RNA splicing	GO:0000166-nucleotide binding;GO:0003676-nucleic acid binding;GO:0003723-RNA binding	GO:0005634-nucleus	66.8285	18.2945	3.65292	1.86905	*		142.596	18.2945	7.79445	2.96245	**		142.596	66.8285	2.13376	1.0934	*		142.596	1065.07	0.133884	-2.90095		**
SAFB2	Scaffold attachment factor B2. [Source:Uniprot/SWISSPROT;Acc:Q14151]	GO:0006350-transcription;GO:0006355-regulation of transcription, DNA-dependent	GO:0000166-nucleotide binding;GO:0003677-DNA binding;GO:0003723-RNA binding	GO:0005634-nucleus	29.8918	16.2596	1.83841	0.878458			63.6277	16.2596	3.91324	1.96836	*		63.6277	29.8918	2.1286	1.08991	*		63.6277	213.23	0.298399	-1.74468		*
KIAA0674	FKBP15 protein (Fragment). [Source:Uniprot/SPTREMBL;Acc:Q6DD85]	GO:0006457-protein folding	GO:0003755-peptidyl-prolyl cis-trans isomerase activity;GO:0016853-isomerase activity	-	14.1131	5.96874	2.3645	1.24154	*		29.9355	5.96874	5.01538	2.32636	**		29.9355	14.1131	2.12111	1.08482	*		29.9355	110.247	0.27153	-1.88082		*
UTP11_HUMAN	Probable U3 small nucleolar RNA-associated protein 11 (U3 snoRNA- associated protein 11) (UTP11-like protein). [Source:Uniprot/SWISSPROT;Acc:Q9Y3A2]	GO:0006364-rRNA processing;GO:0006917-induction of apoptosis;GO:0007399-nervous system development;GO:0048011-nerve growth factor receptor signaling pathway	GO:0005515-protein binding	GO:0005615-extracellular space;GO:0005634-nucleus;GO:0005737-cytoplasm;GO:0030529-ribonucleoprotein complex	25.0148	6.91477	3.61759	1.85503	*		53.0267	6.91477	7.66862	2.93897	**		53.0267	25.0148	2.11981	1.08394	*		53.0267	280.212	0.189238	-2.40173		**
ZNF278	POZ-, AT hook-, and zinc finger-containing protein 1 (Zinc finger protein 278) (Zinc finger sarcoma gene protein) (BTB-POZ domain zinc finger transcription factor) (Protein kinase A RI-subunit alpha- associated protein) (Zinc finger and BTB domain-contain [Source:Uniprot/SWISSPROT;Acc:Q9HBE1]	GO:0006350-transcription;GO:0006355-regulation of transcription, DNA-dependent	GO:0003677-DNA binding;GO:0005515-protein binding;GO:0008270-zinc ion binding;GO:0016564-transcriptional repressor activity;GO:0046872-metal ion binding	GO:0005622-intracellular;GO:0005634-nucleus	40.8319	17.6008	2.31989	1.21406	*		86.5074	17.6008	4.91497	2.29718	**		86.5074	40.8319	2.11862	1.08313	*		86.5074	143.71	0.601958	-0.732265
RS26_HUMAN	40S ribosomal protein S26. [Source:Uniprot/SWISSPROT;Acc:P62854]	GO:0006412-translation	GO:0003735-structural constituent of ribosome	GO:0005622-intracellular;GO:0005840-ribosome	1575.23	1409.56	1.11754	0.16032			3334.56	1409.56	2.36567	1.24225	*		3334.56	1575.23	2.11687	1.08193	*		3334.56	4817.97	0.692109	-0.530929
-	-	-	-	-	81.7065	66.0528	1.23699	0.306831			172.804	66.0528	2.61615	1.38745	*		172.804	81.7065	2.11494	1.08062	*		172.804	200.549	0.861654	-0.21482
NHP2L1	NHP2-like protein 1 (High mobility group-like nuclear protein 2 homolog 1) (U4/U6.U5 tri-snRNP 15.5 kDa protein) (OTK27) (hSNU13). [Source:Uniprot/SWISSPROT;Acc:P55769]	GO:0000074-regulation of progression through cell cycle;GO:0006397-mRNA processing;GO:0007338-single fertilization;GO:0008380-RNA splicing;GO:0042254-ribosome biogenesis and assembly	GO:0003723-RNA binding	GO:0005634-nucleus;GO:0005681-spliceosome;GO:0005730-nucleolus	46.9017	5.22181	8.98188	3.16702	***		99.0091	5.22181	18.9607	4.24494	***		99.0091	46.9017	2.11099	1.07792	*		99.0091	570.376	0.173586	-2.52628		**
POP5	Ribonuclease P/MRP protein subunit POP5 (EC 3.1.26.5) (hPop5). [Source:Uniprot/SWISSPROT;Acc:Q969H6]	GO:0008033-tRNA processing	GO:0004526-ribonuclease P activity;GO:0004540-ribonuclease activity;GO:0005515-protein binding;GO:0016787-hydrolase activity	GO:0005634-nucleus;GO:0005655-nucleolar ribonuclease P complex	70.5523	39.8658	1.76975	0.823543			148.472	39.8658	3.7243	1.89697	*		148.472	70.5523	2.10443	1.07343	*		148.472	252.865	0.587159	-0.768178
DAXX	Death domain-associated protein 6 (Daxx) (hDaxx) (Fas death domain- associated protein) (ETS1-associated protein 1) (EAP1). [Source:Uniprot/SWISSPROT;Acc:Q9UER7]	GO:0006350-transcription;GO:0006915-apoptosis;GO:0007257-activation of JNK activity;GO:0008625-induction of apoptosis via death domain receptors;GO:0030521-androgen receptor signaling pathway;GO:0045892-negative regulation of transcription, DNA-dependent	GO:0005057-receptor signaling protein activity;GO:0016564-transcriptional repressor activity;GO:0019901-protein kinase binding;GO:0031072-heat shock protein binding;GO:0042802-identical protein binding;GO:0047485-protein N-terminus binding;GO:0050681-androgen receptor binding	GO:0005634-nucleus;GO:0005737-cytoplasm;GO:0016605-PML body	143.703	68.6025	2.09471	1.06675	*		301.483	68.6025	4.39463	2.13574	**		301.483	143.703	2.09796	1.06899	*		301.483	436.032	0.691423	-0.532359
SIGLEC11	-	-	-	-	24.7762	20.0844	1.2336	0.302875			51.8547	20.0844	2.58183	1.3684	*		51.8547	24.7762	2.09293	1.06552	*		51.8547	172.612	0.300412	-1.73499		*
-	-	-	-	-	126.883	31.9698	3.96884	1.98872	*		265.401	31.9698	8.30163	3.0534	***		265.401	126.883	2.0917	1.06468	*		265.401	702.223	0.377944	-1.40375		*
NP_150638.1	Mof4 family associated protein 1 [Source:RefSeq_peptide;Acc:NP_150638]	-	GO:0005515-protein binding	-	56.6419	4.51013	12.5588	3.65063	***		118.294	4.51013	26.2284	4.71306	***		118.294	56.6419	2.08845	1.06243	*		118.294	2569.86	0.0460313	-4.44124		***
NP_660327.2	Protein FAM122B. [Source:Uniprot/SWISSPROT;Acc:Q7Z309]	-	-	-	11.2457	3.08763	3.64218	1.8648	*		23.4839	3.08763	7.60581	2.9271	**		23.4839	11.2457	2.08826	1.0623	*		23.4839	233.424	0.100606	-3.31321		***
ICT1	Immature colon carcinoma transcript 1 protein precursor (Digestion substraction 1) (DS-1). [Source:Uniprot/SWISSPROT;Acc:Q14197]	GO:0006415-translational termination;GO:0008150-biological_process	GO:0003674-molecular_function;GO:0003747-translation release factor activity	GO:0005575-cellular_component	28.5977	3.37376	8.47652	3.08347	***		59.7126	3.37376	17.6991	4.14561	***		59.7126	28.5977	2.08802	1.06213	*		59.7126	288.014	0.207325	-2.27003		**
COMTD1	Catechol-O-methyltransferase domain-containing protein 1 (EC 2.1.1.-). [Source:Uniprot/SWISSPROT;Acc:Q86VU5]	-	GO:0008171-O-methyltransferase activity;GO:0016740-transferase activity	GO:0016020-membrane;GO:0016021-integral to membrane	38.6131	11.3534	3.40101	1.76596	*		80.6121	11.3534	7.10024	2.82787	**		80.6121	38.6131	2.08769	1.0619	*		80.6121	14.5379	5.54495	2.47118	**
PP	Inorganic pyrophosphatase (EC 3.6.1.1) (Pyrophosphate phospho- hydrolase) (PPase). [Source:Uniprot/SWISSPROT;Acc:Q15181]	GO:0006796-phosphate metabolic process	GO:0000287-magnesium ion binding;GO:0004427-inorganic diphosphatase activity;GO:0016787-hydrolase activity	GO:0005737-cytoplasm	109.486	56.9881	1.92121	0.942015			228.552	56.9881	4.01052	2.00379	**		228.552	109.486	2.0875	1.06177	*		228.552	1391.26	0.164277	-2.6058		**
RARS	Arginyl-tRNA synthetase, cytoplasmic (EC 6.1.1.19) (Arginine--tRNA ligase) (ArgRS). [Source:Uniprot/SWISSPROT;Acc:P54136]	GO:0006420-arginyl-tRNA aminoacylation	GO:0000166-nucleotide binding;GO:0004814-arginine-tRNA ligase activity;GO:0005515-protein binding;GO:0005524-ATP binding;GO:0016874-ligase activity	GO:0005625-soluble fraction;GO:0005737-cytoplasm	67.6449	17.7057	3.82052	1.93377	*		140.854	17.7057	7.95533	2.99192	**		140.854	67.6449	2.08226	1.05815	*		140.854	437.245	0.322141	-1.63424		*
SH3BGRL3	SH3 domain-binding glutamic acid-rich-like protein 3 (SH3 domain- binding protein 1) (SH3BP-1). [Source:Uniprot/SWISSPROT;Acc:Q9H299]	-	-	GO:0005634-nucleus	49.7553	15.5592	3.1978	1.67708	*		103.505	15.5592	6.65231	2.73385	**		103.505	49.7553	2.08027	1.05677	*		103.505	109.301	0.946969	-0.0786104
DDX39	ATP-dependent RNA helicase DDX39 (EC 3.6.1.-) (DEAD box protein 39) (Nuclear RNA helicase URH49). [Source:Uniprot/SWISSPROT;Acc:O00148]	GO:0000398-nuclear mRNA splicing, via spliceosome;GO:0006406-mRNA export from nucleus;GO:0008380-RNA splicing	GO:0000166-nucleotide binding;GO:0003676-nucleic acid binding;GO:0004004-ATP-dependent RNA helicase activity;GO:0005515-protein binding;GO:0005524-ATP binding;GO:0016787-hydrolase activity	GO:0005634-nucleus	98.2155	82.8673	1.18521	0.245148			203.608	82.8673	2.45704	1.29692	*		203.608	98.2155	2.07307	1.05177	*		203.608	217.308	0.936954	-0.0939493
STK19	Serine/threonine-protein kinase 19 (EC 2.7.11.1) (Protein RP1) (Protein G11). [Source:Uniprot/SWISSPROT;Acc:P49842]	GO:0006468-protein amino acid phosphorylation	GO:0000166-nucleotide binding;GO:0004674-protein serine/threonine kinase activity;GO:0005515-protein binding;GO:0005524-ATP binding;GO:0016301-kinase activity;GO:0016740-transferase activity;GO:0030145-manganese ion binding	GO:0005634-nucleus	15.1857	5.01876	3.02579	1.59731	*		31.4396	5.01876	6.26441	2.64718	**		31.4396	15.1857	2.07034	1.04987	*		31.4396	121.495	0.258773	-1.95024		*
Q9UI98_HUMAN	Probable ATP-dependent RNA helicase DDX47 (EC 3.6.1.-) (DEAD box protein 47). [Source:Uniprot/SWISSPROT;Acc:Q9H0S4]	GO:0001525-angiogenesis;GO:0006869-lipid transport;GO:0007275-multicellular organismal development;GO:0016070-RNA metabolic process;GO:0030154-cell differentiation;GO:0042157-lipoprotein metabolic process	GO:0003676-nucleic acid binding;GO:0004004-ATP-dependent RNA helicase activity;GO:0005524-ATP binding;GO:0008026-ATP-dependent helicase activity;GO:0008289-lipid binding;GO:0016787-hydrolase activity	GO:0005576-extracellular region;GO:0005634-nucleus;GO:0005730-nucleolus;GO:0005737-cytoplasm;GO:0016020-membrane;GO:0016021-integral to membrane	45.3202	3.83474	11.8183	3.56295	***		93.7239	3.83474	24.4407	4.61122	***		93.7239	45.3202	2.06804	1.04826	*		93.7239	471.552	0.198756	-2.33093		**
XP_061427.1	-	GO:0016071-mRNA metabolic process	-	GO:0030529-ribonucleoprotein complex	23.9252	4.67332	5.11953	2.35601	**		49.4241	4.67332	10.5758	3.40269	***		49.4241	23.9252	2.06578	1.04668	*		49.4241	346.28	0.142729	-2.80865		**
RNF111	ring finger protein 111 [Source:RefSeq_peptide;Acc:NP_060080]	GO:0006512-ubiquitin cycle;GO:0007275-multicellular organismal development	GO:0005515-protein binding;GO:0008270-zinc ion binding;GO:0016874-ligase activity;GO:0046872-metal ion binding	GO:0005634-nucleus	30.6827	9.27774	3.30713	1.72558	*		63.3753	9.27774	6.83089	2.77207	**		63.3753	30.6827	2.06551	1.0465	*		63.3753	149.477	0.423981	-1.23793		*
PCOLCE	Procollagen C-endopeptidase enhancer 1 precursor (Procollagen COOH- terminal proteinase enhancer 1) (Procollagen C-proteinase enhancer 1) (PCPE-1) (Type I procollagen COOH-terminal proteinase enhancer) (Type 1 procollagen C-proteinase enhancer protein). [Source:Uniprot/SWISSPROT;Acc:Q15113]	GO:0006508-proteolysis;GO:0007275-multicellular organismal development	GO:0005518-collagen binding	-	58.277	8.36226	6.96905	2.80096	**		120.16	8.36226	14.3694	3.84492	***		120.16	58.277	2.06188	1.04396	*		120.16	114.759	1.04707	0.0663542
NDUFA2	NADH dehydrogenase [ubiquinone] 1 alpha subcomplex subunit 2 (EC 1.6.5.3) (EC 1.6.99.3) (NADH-ubiquinone oxidoreductase B8 subunit) (Complex I-B8) (CI-B8). [Source:Uniprot/SWISSPROT;Acc:O43678]	GO:0006091-generation of precursor metabolites and energy;GO:0006120-mitochondrial electron transport, NADH to ubiquinone	GO:0003954-NADH dehydrogenase activity;GO:0008137-NADH dehydrogenase (ubiquinone) activity;GO:0016491-oxidoreductase activity	GO:0005739-mitochondrion;GO:0005747-mitochondrial respiratory chain complex I;GO:0031966-mitochondrial membrane	62.9531	9.4629	6.65262	2.73392	**		129.626	9.4629	13.6983	3.77593	***		129.626	62.9531	2.05909	1.04201	*		129.626	444.699	0.291492	-1.77847		*
COX5B	Cytochrome c oxidase subunit 5B, mitochondrial precursor (EC 1.9.3.1) (Cytochrome c oxidase polypeptide Vb). [Source:Uniprot/SWISSPROT;Acc:P10606]	GO:0006118-electron transport;GO:0007585-respiratory gaseous exchange	GO:0004129-cytochrome-c oxidase activity;GO:0008270-zinc ion binding;GO:0016491-oxidoreductase activity;GO:0046872-metal ion binding	GO:0005739-mitochondrion;GO:0005740-mitochondrial envelope;GO:0016020-membrane	73.691	4.34268	16.969	4.08483	***		151.51	4.34268	34.8887	5.12469	***		151.51	73.691	2.05602	1.03986	*		151.51	723.692	0.209358	-2.25596		**
NCKAP1	Nck-associated protein 1 (NAP 1) (p125Nap1) (Membrane-associated protein HEM-2). [Source:Uniprot/SWISSPROT;Acc:Q9Y2A7]	GO:0006915-apoptosis;GO:0007417-central nervous system development	GO:0005515-protein binding	GO:0016020-membrane;GO:0016021-integral to membrane	109.781	21.5189	5.10159	2.35095	**		225.691	21.5189	10.488	3.39067	***		225.691	109.781	2.05584	1.03973	*		225.691	570.853	0.395358	-1.33877		*
Q9H3B6_HUMAN	-	-	-	-	56.889	4.44761	12.7909	3.67705	***		116.736	4.44761	26.2469	4.71407	***		116.736	56.889	2.052	1.03703	*		116.736	38.345	3.04436	1.60614	*
H33_HUMAN	Histone H3.3. [Source:Uniprot/SWISSPROT;Acc:P84243]	GO:0006334-nucleosome assembly;GO:0007001-chromosome organization and biogenesis (sensu Eukaryota)	GO:0003677-DNA binding	GO:0000786-nucleosome;GO:0005634-nucleus;GO:0005694-chromosome	29.3994	11.0204	2.66771	1.4156	*		60.2348	11.0204	5.46573	2.45041	**		60.2348	29.3994	2.04884	1.03481	*		60.2348	246.124	0.244733	-2.03072		**
KPNB1	Importin beta-1 subunit (Karyopherin beta-1 subunit) (Nuclear factor P97) (Importin 90). [Source:Uniprot/SWISSPROT;Acc:Q14974]	GO:0000059-protein import into nucleus, docking;GO:0000060-protein import into nucleus, translocation;GO:0006607-NLS-bearing substrate import into nucleus;GO:0006610-ribosomal protein import into nucleus;GO:0006886-intracellular protein transport	GO:0005515-protein binding;GO:0008139-nuclear localization sequence binding;GO:0008270-zinc ion binding;GO:0008565-protein transporter activity	GO:0005634-nucleus;GO:0005643-nuclear pore;GO:0005737-cytoplasm	123.825	36.8511	3.36016	1.74853	*		253.678	36.8511	6.88388	2.78322	**		253.678	123.825	2.04868	1.03469	*		253.678	1093.89	0.231906	-2.10839		**
C6orf83	Vesicle transport protein SFT2A (SFT2 domain-containing protein 1) (pRGR1). [Source:Uniprot/SWISSPROT;Acc:Q8WV19]	GO:0015031-protein transport	-	GO:0016020-membrane;GO:0016021-integral to membrane	46.422	16.1252	2.87885	1.52549	*		95.0916	16.1252	5.89709	2.56	**		95.0916	46.422	2.04842	1.03451	*		95.0916	324.537	0.293007	-1.77099		*
PRKD2	Serine/threonine-protein kinase D2 (EC 2.7.11.13) (nPKC-D2). [Source:Uniprot/SWISSPROT;Acc:Q9BZL6]	GO:0006468-protein amino acid phosphorylation;GO:0007242-intracellular signaling cascade	GO:0000166-nucleotide binding;GO:0004674-protein serine/threonine kinase activity;GO:0005524-ATP binding;GO:0008270-zinc ion binding;GO:0016740-transferase activity;GO:0019992-diacylglycerol binding;GO:0046872-metal ion binding	GO:0005622-intracellular	35.8247	10.5305	3.40199	1.76638	*		73.3589	10.5305	6.96632	2.8004	**		73.3589	35.8247	2.04772	1.03402	*		73.3589	39.9594	1.83584	0.876438
MRPS7	28S ribosomal protein S7, mitochondrial precursor (S7mt) (MRP-S7) (bMRP27a) (bMRP-27a). [Source:Uniprot/SWISSPROT;Acc:Q9Y2R9]	GO:0006412-translation	GO:0003723-RNA binding;GO:0003735-structural constituent of ribosome;GO:0005515-protein binding	GO:0005622-intracellular;GO:0005739-mitochondrion;GO:0005840-ribosome;GO:0005843-cytosolic small ribosomal subunit (sensu Eukaryota)	28.8489	4.96691	5.80821	2.53809	**		58.9995	4.96691	11.8785	3.57028	***		58.9995	28.8489	2.04512	1.03219	*		58.9995	286.726	0.20577	-2.2809		**
ZC3HDC1	Poly [ADP-ribose] polymerase 12 (EC 2.4.2.30) (PARP-12) (Zinc finger CCCH domain-containing protein 1). [Source:Uniprot/SWISSPROT;Acc:Q9H0J9]	GO:0006471-protein amino acid ADP-ribosylation	GO:0003676-nucleic acid binding;GO:0003950-NAD+ ADP-ribosyltransferase activity;GO:0008270-zinc ion binding;GO:0016740-transferase activity;GO:0046872-metal ion binding	GO:0005634-nucleus	140.819	71.9626	1.95684	0.968526			287.62	71.9626	3.99679	1.99884	*		287.62	140.819	2.04247	1.03032	*		287.62	456.919	0.629476	-0.667776
SEMA4C	Semaphorin-4C precursor. [Source:Uniprot/SWISSPROT;Acc:Q9C0C4]	GO:0007275-multicellular organismal development;GO:0007399-nervous system development;GO:0030154-cell differentiation	GO:0004872-receptor activity;GO:0005515-protein binding	GO:0016020-membrane;GO:0016021-integral to membrane	10.9281	10.3951	1.05128	0.0721467			22.2999	10.3951	2.14525	1.10114	*		22.2999	10.9281	2.04061	1.029	*		22.2999	21.4348	1.04036	0.057083
NP_116317.1	transmembrane protein 141 [Source:RefSeq_peptide;Acc:NP_116317]	-	-	GO:0016020-membrane;GO:0016021-integral to membrane	33.4628	8.34967	4.00768	2.00277	**		68.1661	8.34967	8.16392	3.02926	***		68.1661	33.4628	2.03707	1.02649	*		68.1661	46.1552	1.47689	0.56256
RPL13	60S ribosomal protein L13 (Breast basic conserved protein 1). [Source:Uniprot/SWISSPROT;Acc:P26373]	GO:0006412-translation	GO:0003723-RNA binding;GO:0003735-structural constituent of ribosome	GO:0005622-intracellular;GO:0005830-cytosolic ribosome (sensu Eukaryota)	2738.31	263.718	10.3835	3.37622	***		5568.47	263.718	21.1152	4.40021	***		5568.47	2738.31	2.03354	1.02399	*		5568.47	16672.7	0.333987	-1.58214		*
NM_016570.2	Endoplasmic reticulum-Golgi intermediate compartment protein 2. [Source:Uniprot/SWISSPROT;Acc:Q96RQ1]	GO:0006810-transport;GO:0006888-ER to Golgi vesicle-mediated transport	GO:0005515-protein binding	GO:0005783-endoplasmic reticulum;GO:0005793-ER-Golgi intermediate compartment;GO:0016020-membrane;GO:0016021-integral to membrane	10.2732	3.82857	2.68331	1.42401	*		20.8887	3.82857	5.45602	2.44785	**		20.8887	10.2732	2.03332	1.02384	*		20.8887	108.048	0.193328	-2.37087		**
NP_064708.1	Ubiquinone biosynthesis protein COQ9, mitochondrial precursor. [Source:Uniprot/SWISSPROT;Acc:O75208]	GO:0006744-ubiquinone biosynthetic process	-	GO:0005739-mitochondrion	64.9146	15.2541	4.25556	2.08935	**		131.944	15.2541	8.64975	3.11266	***		131.944	64.9146	2.03258	1.02331	*		131.944	278.598	0.473599	-1.07826		*
TSFM	Elongation factor Ts, mitochondrial precursor (EF-Ts) (EF-TsMt). [Source:Uniprot/SWISSPROT;Acc:P43897]	GO:0006414-translational elongation	GO:0003711-transcriptional elongation regulator activity;GO:0003746-translation elongation factor activity	GO:0005622-intracellular;GO:0005739-mitochondrion	10.3885	3.76272	2.76089	1.46513	*		21.0837	3.76272	5.60331	2.48628	**		21.0837	10.3885	2.02953	1.02115	*		21.0837	147.718	0.142729	-2.80865		**
NP_116024.1	Transmembrane protein 147 (Protein NIFIE 14). [Source:Uniprot/SWISSPROT;Acc:Q9BVK8]	-	GO:0005515-protein binding	GO:0016020-membrane;GO:0016021-integral to membrane	141.939	78.3029	1.81269	0.858132			287.887	78.3029	3.67658	1.87836	*		287.887	141.939	2.02824	1.02023	*		287.887	793.355	0.362872	-1.46247		*
NPIP	-	GO:0007218-neuropeptide signaling pathway	-	GO:0005634-nucleus;GO:0016020-membrane;GO:0016021-integral to membrane	84.1768	27.6686	3.04232	1.60517	*		170.501	27.6686	6.16224	2.62345	**		170.501	84.1768	2.0255	1.01828	*		170.501	198.028	0.860993	-0.215927
SNX3	Sorting nexin-3 (Protein SDP3). [Source:Uniprot/SWISSPROT;Acc:O60493]	GO:0006897-endocytosis;GO:0007154-cell communication;GO:0015031-protein transport	GO:0005515-protein binding;GO:0035091-phosphoinositide binding	GO:0005737-cytoplasm	13.3617	2.28745	5.84133	2.5463	**		27.0166	2.28745	11.8108	3.56204	***		27.0166	13.3617	2.02194	1.01574	*		27.0166	462.19	0.0584534	-4.09657		***
-	-	-	-	-	10.9802	7.153	1.53504	0.618278			22.192	7.153	3.10247	1.63342	*		22.192	10.9802	2.0211	1.01514	*		22.192	100.149	0.22159	-2.17404		**
NIPA2	Non-imprinted in Prader-Willi/Angelman syndrome region protein 2. [Source:Uniprot/SWISSPROT;Acc:Q8N8Q9]	-	GO:0005515-protein binding	GO:0016020-membrane;GO:0016021-integral to membrane	11.2903	4.70758	2.39832	1.26202	*		22.7984	4.70758	4.84291	2.27587	**		22.7984	11.2903	2.0193	1.01385	*		22.7984	143.15	0.159262	-2.65053		**
TPM2	Tropomyosin beta chain (Tropomyosin 2) (Beta-tropomyosin). [Source:Uniprot/SWISSPROT;Acc:P07951]	-	GO:0003779-actin binding;GO:0008307-structural constituent of muscle	GO:0005856-cytoskeleton;GO:0005862-muscle thin filament tropomyosin	43.4624	12.3387	3.52245	1.81658	*		87.4157	12.3387	7.08468	2.8247	**		87.4157	43.4624	2.0113	1.00812	*		87.4157	216.61	0.403562	-1.30914		*
MTIF2	Translation initiation factor IF-2, mitochondrial precursor (IF-2Mt) (IF-2(Mt)). [Source:Uniprot/SWISSPROT;Acc:P46199]	GO:0006446-regulation of translational initiation	GO:0000166-nucleotide binding;GO:0003743-translation initiation factor activity;GO:0003924-GTPase activity;GO:0005525-GTP binding;GO:0043024-ribosomal small subunit binding	GO:0005622-intracellular;GO:0005739-mitochondrion	61.1964	20.9177	2.92559	1.54873	*		122.999	20.9177	5.88017	2.55586	**		122.999	61.1964	2.00991	1.00713	*		122.999	551.637	0.222972	-2.16507		**
-	Metalloproteinase inhibitor 2 precursor (TIMP-2) (Tissue inhibitor of metalloproteinases 2) (CSC-21K). [Source:Uniprot/SWISSPROT;Acc:P16035]	GO:0008152-metabolic process;GO:0008285-negative regulation of cell proliferation;GO:0030814-regulation of cAMP metabolic process;GO:0043408-regulation of MAPKKK cascade;GO:0045664-regulation of neuron differentiation	GO:0004857-enzyme inhibitor activity;GO:0005178-integrin binding;GO:0005515-protein binding;GO:0008047-enzyme activator activity;GO:0008191-metalloendopeptidase inhibitor activity	GO:0005578-proteinaceous extracellular matrix;GO:0005604-basement membrane;GO:0009986-cell surface	53.7848	10.4889	5.1278	2.35834	**		108.088	10.4889	10.3051	3.36528	***		108.088	53.7848	2.00965	1.00694	*		108.088	594.74	0.18174	-2.46005		**
-	Guanine nucleotide-binding protein subunit beta 2-like 1 (Guanine nucleotide-binding protein subunit beta-like protein 12.3) (Receptor of activated protein kinase C 1) (RACK1) (Receptor for activated C kinase). [Source:Uniprot/SWISSPROT;Acc:P63244]	GO:0007165-signal transduction;GO:0007205-protein kinase C activation	GO:0005080-protein kinase C binding;GO:0005102-receptor binding	GO:0005737-cytoplasm;GO:0043025-cell soma	3766.3	1807.86	2.08329	1.05886	*		7566.64	1807.86	4.18541	2.06537	**		7566.64	3766.3	2.00904	1.0065	*		7566.64	10376	0.729241	-0.455532
Q6NS36_HUMAN	ferritin, heavy polypeptide-like 8 (FTHL8) on chromosome X [Source:RefSeq_dna;Acc:NR_002203]	-	-	-	111.854	6.9376	16.1228	4.01103	***		224.492	6.9376	32.3588	5.01609	***		224.492	111.854	2.00702	1.00506	*		224.492	2790.43	0.080451	-3.63575		***
K1002_HUMAN	R3H domain-containing protein 2 (Fragment). [Source:Uniprot/SWISSPROT;Acc:Q9Y2K5]	-	GO:0003676-nucleic acid binding	GO:0005634-nucleus	19.7701	7.1706	2.75711	1.46316	*		39.6672	7.1706	5.53192	2.46778	**		39.6672	19.7701	2.00642	1.00462	*		39.6672	40.6682	0.975385	-0.0359558
FBXL5	F-box/LRR-repeat protein 5 (F-box and leucine-rich repeat protein 5) (F-box protein FBL4/FBL5) (p45SKP2-like protein). [Source:Uniprot/SWISSPROT;Acc:Q9UKA1]	GO:0016567-protein ubiquitination	GO:0004842-ubiquitin-protein ligase activity;GO:0005515-protein binding	GO:0000151-ubiquitin ligase complex	186.491	50.863	3.66654	1.87442	*		373.569	50.863	7.3446	2.87668	**		373.569	186.491	2.00314	1.00227	*		373.569	2280.49	0.16381	-2.6099		**

## Sheet: decreased
NAME	description	global normalization
Name		MPM	PAC	ratio(M/P)	LOG2[ratio(M/P)]	up	down
SCGB3A1	Uteroglobin-related protein 2 precursor (Cytokine HIN-1) (High in normal-1) (Secretoglobin family 3A member 1) (Pneumo secretory protein 2) (PnSP-2). [Source:Uniprot/SWISSPROT;Acc:Q96QR1]	5.05526	5072.03	0.000996693	-9.97056		***
Q14922_HUMAN	Carcinoembryonic antigen-related cell adhesion molecule 6 precursor (Normal cross-reacting antigen) (Nonspecific crossreacting antigen) (CD66c antigen). [Source:Uniprot/SWISSPROT;Acc:P40199]	1.86817	1724.93	0.00108304	-9.85069		***
S100P	Protein S100-P (S100 calcium-binding protein P). [Source:Uniprot/SWISSPROT;Acc:P25815]	1.76961	374.207	0.00472896	-7.72426		***
Q8IY99_HUMAN	CDNA FLJ38841 fis, clone MESAN2003529 (Hypothetical protein LOC285498). [Source:Uniprot/SPTREMBL;Acc:Q8N8U7]	5.2793	970.46	0.00544	-7.52218		***
Q9BT26_HUMAN	MGC10981 protein. [Source:Uniprot/SPTREMBL;Acc:Q9BT26]	1.82136	156.813	0.0116149	-6.42788		***
PROM1	Prominin-1 precursor (Prominin-like protein 1) (Antigen AC133) (CD133 antigen). [Source:Uniprot/SWISSPROT;Acc:O43490]	2.77214	203.389	0.0136297	-6.1971		***
CSH1	Chorionic somatomammotropin hormone precursor (Choriomammotropin) (Lactogen). [Source:Uniprot/SWISSPROT;Acc:P01243]	1.97997	93.8226	0.0211033	-5.56639		***
CCL21	Small inducible cytokine A21 precursor (CCL21) (Beta chemokine exodus- 2) (6Ckine) (Secondary lymphoid-tissue chemokine) (SLC). [Source:Uniprot/SWISSPROT;Acc:O00585]	14.352	580.754	0.0247127	-5.3386		***
CX3CL1	Fractalkine precursor (CX3CL1) (Neurotactin) (CX3C membrane-anchored chemokine) (Small inducible cytokine D1). [Source:Uniprot/SWISSPROT;Acc:P78423]	5.10378	180.924	0.0282095	-5.14767		***
SOCS3	Suppressor of cytokine signaling 3 (SOCS-3) (Cytokine-inducible SH2 protein 3) (CIS-3) (STAT-induced STAT inhibitor 3) (SSI-3). [Source:Uniprot/SWISSPROT;Acc:O14543]	4.21607	132.555	0.0318062	-4.97455		***
O15546_HUMAN	-	1.7091	45.9383	0.0372041	-4.74839		***
FCN3	Ficolin-3 precursor (Collagen/fibrinogen domain-containing protein 3) (Collagen/fibrinogen domain-containing lectin 3 p35) (Hakata antigen). [Source:Uniprot/SWISSPROT;Acc:O75636]	1.34947	34.7787	0.0388016	-4.68774		***
CST6	Cystatin-M precursor (Cystatin-6) (Cystatin-E). [Source:Uniprot/SWISSPROT;Acc:Q15828]	1.59687	39.8719	0.04005	-4.64205		***
HCRT	Orexin precursor (Hypocretin) (Hcrt) [Contains: Orexin-A (Hypocretin- 1) (Hcrt1); Orexin-B (Hypocretin-2) (Hcrt2)]. [Source:Uniprot/SWISSPROT;Acc:O43612]	9.04003	215.615	0.0419267	-4.57599		***
RNASE1	Ribonuclease pancreatic precursor (EC 3.1.27.5) (RNase 1) (RNase A) (RNase UpI-1) (RIB-1) (HP-RNase). [Source:Uniprot/SWISSPROT;Acc:P07998]	6.01196	135.654	0.0443183	-4.49595		***
TSCOT_HUMAN	Thymic stromal cotransporter homolog. [Source:Uniprot/SWISSPROT;Acc:Q9BY10]	2.33402	47.7502	0.0488799	-4.35461		***
DNALI1	Axonemal dynein light intermediate polypeptide 1 (Inner dynein arm light chain, axonemal) (hp28). [Source:Uniprot/SWISSPROT;Acc:O14645]	5.95044	114.314	0.0520533	-4.26387		***
Q8NH62_HUMAN	-	1.40444	25.0491	0.0560676	-4.15669		***
-	Killer cell immunoglobulin-like receptor 3DL2 precursor (MHC class I NK cell receptor) (Natural killer-associated transcript 4) (NKAT-4) (p70 natural killer cell receptor clone CL-5) (CD158k antigen). [Source:Uniprot/SWISSPROT;Acc:P43630]	2.22884	38.4179	0.0580157	-4.10741		***
-	Pulmonary surfactant-associated protein C precursor (SP-C) (SP5) (Pulmonary surfactant-associated proteolipid SPL(Val)). [Source:Uniprot/SWISSPROT;Acc:P11686]	14.2006	233.341	0.0608578	-4.03841		***
-	Transcription factor Sp5. [Source:Uniprot/SWISSPROT;Acc:Q6BEB4]	2.02508	29.5837	0.0684527	-3.86875		***
MYL3	Myosin light polypeptide 3 (Myosin light chain 1, slow-twitch muscle B/ventricular isoform) (MLC1SB) (Ventricular/slow twitch myosin alkali light chain) (Cardiac myosin light chain-1) (CMLC1). [Source:Uniprot/SWISSPROT;Acc:P08590]	1.59128	22.6236	0.0703371	-3.82957		***
WFDC2	WAP four-disulfide core domain protein 2 precursor (Major epididymis- specific protein E4) (Epididymal secretory protein E4) (Putative protease inhibitor WAP5). [Source:Uniprot/SWISSPROT;Acc:Q14508]	65.8839	914.336	0.0720566	-3.79473		***
MOSPD1	Motile sperm domain-containing protein 1. [Source:Uniprot/SWISSPROT;Acc:Q9UJG1]	50.1601	657.356	0.0763059	-3.71206		***
CPM	Carboxypeptidase M precursor (EC 3.4.17.12) (CPM). [Source:Uniprot/SWISSPROT;Acc:P14384]	20.2234	262.033	0.0771788	-3.69565		***
EVA1	Epithelial V-like antigen 1 precursor. [Source:Uniprot/SWISSPROT;Acc:O60487]	10.224	128.909	0.0793118	-3.65632		***
C20orf102	Uncharacterized protein C20orf102 precursor. [Source:Uniprot/SWISSPROT;Acc:Q96N03]	3.23646	40.669	0.0795804	-3.65144		***
Q96FU0_HUMAN	-	8.48738	97.1453	0.0873678	-3.51675		***
Q7Z7L3_HUMAN	C19orf46 protein. [Source:Uniprot/SPTREMBL;Acc:Q7Z7L3]	6.50244	71.7821	0.0905858	-3.46457		***
IGSF4	-	11.1979	120.489	0.0929371	-3.4276		***
RRAD	GTP-binding protein RAD (RAS associated with diabetes) (RAD1). [Source:Uniprot/SWISSPROT;Acc:P55042]	6.95144	74.2986	0.0935608	-3.41795		***
ZNF197	Zinc finger protein 197 (ZnF20). [Source:Uniprot/SWISSPROT;Acc:O14709]	5.44648	56.8923	0.0957332	-3.38484		***
NP_079106.3	1-acylglycerophosphocholine O-acyltransferase 1 (EC 2.3.1.23) (Lung- type acyl-coa:lysophosphatidylcholine acyltransferase 1) (Acyltransferase-like 2) (Phosphonoformate immuno-associated protein 3). [Source:Uniprot/SWISSPROT;Acc:Q8NF37]	2.00497	20.5604	0.097516	-3.35822		***
CG38_HUMAN	Protein CGI-38. [Source:Uniprot/SWISSPROT;Acc:Q9BW30]	33.4887	331.695	0.100962	-3.30811		***
CTH	Cystathionine gamma-lyase (EC 4.4.1.1) (Gamma-cystathionase). [Source:Uniprot/SWISSPROT;Acc:P32929]	2.17389	21.235	0.102373	-3.2881		***
GNPNAT1	Glucosamine 6-phosphate N-acetyltransferase (EC 2.3.1.4) (Phosphoglucosamine transacetylase) (Phosphoglucosamine acetylase). [Source:Uniprot/SWISSPROT;Acc:Q96EK6]	18.1908	169.517	0.107309	-3.22015		***
Q6ZV33_HUMAN	SH3-containing GRB2-like protein 3-interacting protein 1 (Endophilin- 3-interacting protein). [Source:Uniprot/SWISSPROT;Acc:Q9BQI5]	5.58654	49.5248	0.112803	-3.14812		***
LMCD1	LIM and cysteine-rich domains protein 1 (Dyxin). [Source:Uniprot/SWISSPROT;Acc:Q9NZU5]	4.16542	36.0328	0.115601	-3.11278		***
A2M	Alpha-2-macroglobulin precursor (Alpha-2-M). [Source:Uniprot/SWISSPROT;Acc:P01023]	4.24281	35.9997	0.117857	-3.0849		***
CHI3L2	Chitinase 3-like protein 2 precursor (YKL-39) (Chondrocyte protein 39). [Source:Uniprot/SWISSPROT;Acc:Q15782]	23.5793	199.368	0.11827	-3.07984		***
NP_057522.1	HIG1 domain family member 1B (Protein CLST 11240). [Source:Uniprot/SWISSPROT;Acc:Q9P298]	10.8355	82.2831	0.131686	-2.92483		**
Q9H385_HUMAN	-	3.23156	23.7692	0.135956	-2.87879		**
GGTL4	Gamma-glutamyltransferase-like protein 4. [Source:Uniprot/SWISSPROT;Acc:Q14390]	8.34584	59.9299	0.13926	-2.84415		**
SEZ6L2	seizure related 6 homolog (mouse)-like 2 isoform 1 [Source:RefSeq_peptide;Acc:NP_036542]	27.3092	191.637	0.142505	-2.81091		**
APBA2	Amyloid beta A4 precursor protein-binding family A member 2 (Neuron- specific X11L protein) (Neuronal Munc18-1-interacting protein 2) (Mint-2) (Adapter protein X11beta). [Source:Uniprot/SWISSPROT;Acc:Q99767]	5.13967	33.4721	0.153551	-2.70321		**
USF2	Upstream stimulatory factor 2 (Upstream transcription factor 2) (FOS- interacting protein) (FIP) (Major late transcription factor 2). [Source:Uniprot/SWISSPROT;Acc:Q15853]	9.84437	62.6136	0.157224	-2.66911		**
-	-	4.71854	28.9459	0.163012	-2.61695		**
ANGPTL4	Angiopoietin-related protein 4 precursor (Angiopoietin-like 4) (Hepatic fibrinogen/angiopoietin-related protein) (HFARP). [Source:Uniprot/SWISSPROT;Acc:Q9BY76]	17.8874	108.869	0.164302	-2.60558		**
GDF15	Growth/differentiation factor 15 precursor (GDF-15) (Placental bone morphogenetic protein) (Placental TGF-beta) (Macrophage inhibitory cytokine 1) (MIC-1) (Prostate differentiation factor) (NSAID-regulated protein 1) (NRG-1). [Source:Uniprot/SWISSPROT;Acc:Q99988]	4.02216	24.3234	0.165362	-2.5963		**
AMY1A	Salivary alpha-amylase precursor (EC 3.2.1.1) (1,4-alpha-D-glucan glucanohydrolase). [Source:Uniprot/SWISSPROT;Acc:P04745]	18.0848	108.418	0.166806	-2.58376		**
CCDC3	Coiled-coil domain-containing protein 3 precursor. [Source:Uniprot/SWISSPROT;Acc:Q9BQI4]	5.31396	31.583	0.168254	-2.57129		**
ACTH_HUMAN	Actin, gamma-enteric smooth muscle (Smooth muscle gamma actin) (Gamma- 2-actin) (Alpha-actin-3). [Source:Uniprot/SWISSPROT;Acc:P63267]	4.93638	29.0318	0.170033	-2.55611		**
OR4FE_HUMAN	-	4.31848	24.8737	0.173616	-2.52603		**
HLA-DRB4	-	436.115	2422.27	0.180044	-2.47358		**
-	-	33.9109	186.076	0.182242	-2.45607		**
SYTL2	Synaptotagmin-like protein 2 (Exophilin-4). [Source:Uniprot/SWISSPROT;Acc:Q9HCH5]	3.97365	21.3457	0.186157	-2.42541		**
ALDOC	Fructose-bisphosphate aldolase C (EC 4.1.2.13) (Brain-type aldolase). [Source:Uniprot/SWISSPROT;Acc:P09972]	11.3717	60.8054	0.187017	-2.41876		**
GGT1	Gamma-glutamyltranspeptidase 1 precursor (EC 2.3.2.2) (Gamma- glutamyltransferase 1) (GGT 1) (CD224 antigen) [Contains: Gamma- glutamyltranspeptidase 1 heavy chain; Gamma-glutamyltranspeptidase 1 light chain]. [Source:Uniprot/SWISSPROT;Acc:P19440]	7.88765	41.9619	0.187972	-2.41141		**
TBA1_HUMAN	Tubulin alpha-1 chain (Alpha-tubulin 1) (Testis-specific alpha- tubulin) (Tubulin H2-alpha). [Source:Uniprot/SWISSPROT;Acc:P68366]	40.9496	216.625	0.189034	-2.40328		**
ENK10_HUMAN	HERV-K_1q22 provirus ancestral Env polyprotein (Envelope polyprotein) (HERV-K102 envelope protein) (HERV-K(III) envelope protein) [Contains: Surface protein (SU); Transmembrane protein (TM)]. [Source:Uniprot/SWISSPROT;Acc:P61567]	4.86622	25.4253	0.191393	-2.38539		**
SIX1	Homeobox protein SIX1 (Sine oculis homeobox homolog 1). [Source:Uniprot/SWISSPROT;Acc:Q15475]	14.2687	72.4729	0.196883	-2.34459		**
MTAC2D1	Membrane targeting tandem C2 domain-containing protein 1 (Tandem C2 protein in nucleus) (Tac2-N). [Source:Uniprot/SWISSPROT;Acc:Q8N9U0]	10.4481	52.4403	0.199237	-2.32744		**
NP_002116.2	HLA class II histocompatibility antigen, DRB1-9 beta chain precursor (MHC class I antigen DRB1*9) (DR-9) (DR9). [Source:Uniprot/SWISSPROT;Acc:Q9TQE0]	172.475	863.673	0.199699	-2.3241		**
COMP	Cartilage oligomeric matrix protein precursor (COMP). [Source:Uniprot/SWISSPROT;Acc:P49747]	20.4566	102.421	0.199731	-2.32387		**
HB2K_HUMAN	HLA class II histocompatibility antigen, DRB1-1 beta chain precursor (MHC class I antigen DRB1*1) (DR-1) (DR1). [Source:Uniprot/SWISSPROT;Acc:P04229]	66.7952	331.805	0.201309	-2.31252		**
CSRP2	Cysteine and glycine-rich protein 2 (Cysteine-rich protein 2) (CRP2) (Smooth muscle cell LIM protein) (SmLIM) (LIM domain only protein 5). [Source:Uniprot/SWISSPROT;Acc:Q16527]	15.6201	77.1636	0.202428	-2.30452		**
HLA-DPA1	HLA class II histocompatibility antigen, DP alpha chain precursor (HLA-SB alpha chain) (MHC class II DP3-alpha) (DP(W3)) (DP(W4)). [Source:Uniprot/SWISSPROT;Acc:P20036]	7.70612	37.5078	0.205453	-2.28312		**
ZNF658	zinc finger protein 658B [Source:RefSeq_peptide;Acc:NP_001027468]	30.9985	150.04	0.206601	-2.27508		**
IGFBP2	Insulin-like growth factor-binding protein 2 precursor (IGFBP-2) (IBP- 2) (IGF-binding protein 2). [Source:Uniprot/SWISSPROT;Acc:P18065]	19.0808	92.079	0.207222	-2.27075		**
LMTK3	Serine/threonine-protein kinase LMTK3 precursor (EC 2.7.11.1) (Lemur tyrosine kinase 3). [Source:Uniprot/SWISSPROT;Acc:Q96Q04]	22.0657	104.874	0.210401	-2.24878		**
NP_849159.1	C19orf51 protein (CDNA FLJ40069 fis, clone TESTI1000094). [Source:Uniprot/SPTREMBL;Acc:Q96AR2]	5.74388	27.0172	0.212601	-2.23378		**
DHRS8	Dehydrogenase/reductase SDR family member 8 precursor (EC 1.1.1.-) (17-beta-hydroxysteroid dehydrogenase 11) (17-beta-HSD 11) (17-beta- HSD XI) (17betaHSDXI) (17bHSD11) (17betaHSD11) (Retinal short-chain dehydrogenase/reductase 2) (retSDR2) (Cutaneous T-c [Source:Uniprot/SWISSPROT;Acc:Q8NBQ5]	37.6485	176.437	0.213382	-2.22849		**
NP_076416.1	GRAM domain-containing protein 3 (HCV NS3-transactivated protein 2). [Source:Uniprot/SWISSPROT;Acc:Q96HH9]	8.82536	41.2369	0.214016	-2.22421		**
-	-	5.30859	24.7551	0.214444	-2.22133		**
NP_064564.1	Uncharacterized protein C11orf75 (Protein FN5). [Source:Uniprot/SWISSPROT;Acc:Q9NRQ5]	7.44848	34.283	0.217264	-2.20248		**
MMP2	72 kDa type IV collagenase precursor (EC 3.4.24.24) (72 kDa gelatinase) (Matrix metalloproteinase-2) (MMP-2) (Gelatinase A) (TBE- 1). [Source:Uniprot/SWISSPROT;Acc:P08253]	12.4167	57.0231	0.217749	-2.19926		**
APOC1	Apolipoprotein C-I precursor (Apo-CI) (ApoC-I). [Source:Uniprot/SWISSPROT;Acc:P02654]	12.4287	57.055	0.217837	-2.19868		**
-	-	14.4384	65.9179	0.219036	-2.19076		**
Q9H6K5_HUMAN	CDNA: FLJ22184 fis, clone HRC00983. [Source:Uniprot/SPTREMBL;Acc:Q9H6K5]	9.63755	43.9493	0.219288	-2.1891		**
CITED2	Cbp/p300-interacting transactivator 2 (MSG-related protein 1) (MRG-1) (P35srj). [Source:Uniprot/SWISSPROT;Acc:Q99967]	4.46025	20.2154	0.220636	-2.18026		**
HLA-DRB3	HLA class II histocompatibility antigen, DRB3-2 beta chain precursor (MHC class I antigen DRB3*2). [Source:Uniprot/SWISSPROT;Acc:P01913]	158.733	718.931	0.220791	-2.17925		**
ICAM2	Intercellular adhesion molecule 2 precursor (ICAM-2) (CD102 antigen). [Source:Uniprot/SWISSPROT;Acc:P13598]	22.4492	99.1795	0.226349	-2.14338		**
HLA-DRB2	HLA class II histocompatibility antigen, DRB1-1 beta chain precursor (MHC class I antigen DRB1*1) (DR-1) (DR1). [Source:Uniprot/SWISSPROT;Acc:P04229]	14.228	62.5233	0.227564	-2.13566		**
POU5F1	POU domain, class 5, transcription factor 1. [Source:Uniprot/SPTREMBL;Acc:Q5STD5]	13.6771	59.4551	0.23004	-2.12004		**
FA43B_HUMAN	Protein FAM43B. [Source:Uniprot/SWISSPROT;Acc:Q6ZT52]	43.4651	182.1	0.238688	-2.0668		**
ALCAM	CD166 antigen precursor (Activated leukocyte-cell adhesion molecule) (ALCAM). [Source:Uniprot/SWISSPROT;Acc:Q13740]	74.7368	312.644	0.239047	-2.06463		**
CD1C	T-cell surface glycoprotein CD1c precursor (CD1c antigen). [Source:Uniprot/SWISSPROT;Acc:P29017]	5.28355	22.0652	0.239452	-2.06219		**
-	-	38.3872	157.82	0.243233	-2.03959		**
RAMP1	Receptor activity-modifying protein 1 precursor (CRLR activity- modifying protein 1) (Calcitonin-receptor-like receptor activity- modifying protein 1). [Source:Uniprot/SWISSPROT;Acc:O60894]	54.0218	217.486	0.248392	-2.00931		**
Q6ZTH1_HUMAN	CDNA FLJ44660 fis, clone BRACE3002344, weakly similar to Vegetatible incompatibility protein HET-E-1. [Source:Uniprot/SPTREMBL;Acc:Q6ZTH1]	14.3223	57.1912	0.250428	-1.99753		*
SLC41A1	solute carrier family 41 member 1 [Source:RefSeq_peptide;Acc:NP_776253]	9.83341	39.0248	0.251979	-1.98863		*
CAPS	Calcyphosin (Calcyphosine). [Source:Uniprot/SWISSPROT;Acc:Q13938]	28.9912	114.78	0.252581	-1.98518		*
ELF3	E74-like factor 3 (ets domain transcription factor, epithelial-specific ) [Source:RefSeq_peptide;Acc:NP_004424]	14.5532	57.6059	0.252634	-1.98488		*
PACSIN3	Protein kinase C and casein kinase substrate in neurons protein 3 (SH3 domain-containing protein 6511) (Endophilin I). [Source:Uniprot/SWISSPROT;Acc:Q9UKS6]	35.4933	139.816	0.253857	-1.97791		*
-	RNA-binding protein with multiple splicing (RBP-MS). [Source:Uniprot/SWISSPROT;Acc:Q93062]	25.5858	99.3375	0.257565	-1.95699		*
MUC20	mucin 20 [Source:RefSeq_peptide;Acc:NP_689886]	34.1698	130.632	0.261573	-1.93471		*
ASPN	Asporin precursor (Periodontal ligament-associated protein 1) (PLAP- 1). [Source:Uniprot/SWISSPROT;Acc:Q9BXN1]	8.87217	33.8204	0.262332	-1.93054		*
HSPA5BP1	transmembrane protein 132A isoform a [Source:RefSeq_peptide;Acc:NP_060340]	38.5909	146.133	0.264081	-1.92095		*
CDH15	Cadherin-15 precursor (Muscle-cadherin) (M-cadherin) (Cadherin-14). [Source:Uniprot/SWISSPROT;Acc:P55291]	11.2147	42.131	0.266188	-1.90948		*
-	-	318.961	1187.35	0.268632	-1.8963		*
NM_031211.2	BolA-like protein 2. [Source:Uniprot/SWISSPROT;Acc:Q9H3K6]	22.6651	83.6201	0.271049	-1.88338		*
CLDN5	Claudin-5 (Transmembrane protein deleted in VCFS) (TMDVCF). [Source:Uniprot/SWISSPROT;Acc:O00501]	6.33842	23.3731	0.271185	-1.88265		*
PCSK1N	ProSAAS precursor (pro-SAAS) (Proprotein convertase subtilisin/kexin type 1 inhibitor) (Proprotein convertase 1 inhibitor) [Contains: KEP; Big SAAS (b-SAAS); Little SAAS (l-SAAS) (N-proSAAS); Big PEN-LEN (b- PEN-LEN) (SAAS CT(1-49)); PEN; Little LEN (l-LE [Source:Uniprot/SWISSPROT;Acc:Q9UHG2]	22.5736	82.2221	0.274544	-1.86489		*
PRELP	Prolargin precursor (Proline-arginine-rich end leucine-rich repeat protein). [Source:Uniprot/SWISSPROT;Acc:P51888]	12.6177	45.7583	0.275747	-1.85858		*
MLEY_HUMAN	Myosin light polypeptide 6B (Smooth muscle and nonmuscle myosin light chain alkali 6B) (Myosin light chain 1 slow-twitch muscle A isoform) (MLC1sa). [Source:Uniprot/SWISSPROT;Acc:P14649]	27.7329	98.499	0.281556	-1.82851		*
Q6PIR5_HUMAN	-	24.0888	84.9144	0.283684	-1.81765		*
TIMM17B	Mitochondrial import inner membrane translocase subunit Tim17-B. [Source:Uniprot/SWISSPROT;Acc:O60830]	239.926	814.89	0.294427	-1.76402		*
C9orf91	C9orf91 protein (Fragment). [Source:Uniprot/SPTREMBL;Acc:A0PJA3]	6.6523	22.5427	0.295098	-1.76073		*
SIA7D_HUMAN	Alpha-N-acetyl-neuraminyl-2,3-beta-galactosyl-1,3-N-acetyl- galactosaminide alpha-2,6-sialyltransferase (EC 2.4.99.7) (NeuAc- alpha-2,3-Gal-beta-1,3-GalNAc-alpha-2,6-sialyltransferase) (ST6GalNAc IV) (Sialyltransferase 7D) (Sialyltransferase 3C). [Source:Uniprot/SWISSPROT;Acc:Q9H4F1]	40.3182	136.531	0.295304	-1.75973		*
Q9BSD4_HUMAN	MGC16385 protein. [Source:Uniprot/SPTREMBL;Acc:Q9BSD4]	6.99995	23.6791	0.295617	-1.7582		*
RHBDL1	Rhomboid-related protein 1 (EC 3.4.21.105) (RRP) (Rhomboid-like protein 1). [Source:Uniprot/SWISSPROT;Acc:O75783]	18.653	63.0681	0.29576	-1.7575		*
NP_848664.1	coordinated expression to IRXA2 homeobox gene (CEI), mRNA [Source:RefSeq_dna;Acc:NM_178569]	47.38	159.864	0.296377	-1.7545		*
TNNI2	Troponin I, fast skeletal muscle (Troponin I, fast-twitch isoform). [Source:Uniprot/SWISSPROT;Acc:P48788]	8.43624	28.2292	0.298848	-1.74252		*
APOD	Apolipoprotein D precursor (Apo-D) (ApoD). [Source:Uniprot/SWISSPROT;Acc:P05090]	6.31775	20.9851	0.301059	-1.73188		*
XP_496488.1	-	8.30453	27.5732	0.301182	-1.73129		*
SCRN1	Secernin-1. [Source:Uniprot/SWISSPROT;Acc:Q12765]	22.7575	75.5377	0.301273	-1.73086		*
PILRA	Paired immunoglobulin-like type 2 receptor alpha precursor (Inhibitory receptor PILR-alpha) (Cell surface receptor FDF03). [Source:Uniprot/SWISSPROT;Acc:Q9UKJ1]	10.0247	33.1806	0.302126	-1.72678		*
BRUNOL4	bruno-like 4, RNA binding protein [Source:RefSeq_peptide;Acc:NP_064565]	24.4741	80.4656	0.304156	-1.71712		*
C1orf24	Niban protein. [Source:Uniprot/SWISSPROT;Acc:Q9BZQ8]	8.39754	27.5894	0.304376	-1.71607		*
-	Zinc finger MYM-type protein 6 (Zinc finger protein 258). [Source:Uniprot/SWISSPROT;Acc:O95789]	9.61831	31.5068	0.305277	-1.71181		*
TEKT1	Tektin-1. [Source:Uniprot/SWISSPROT;Acc:Q969V4]	7.20863	23.5246	0.30643	-1.70637		*
WFDC3	WAP four-disulfide core domain protein 3 precursor (Putative protease inhibitor WAP14). [Source:Uniprot/SWISSPROT;Acc:Q8IUB2]	11.2947	36.8245	0.306717	-1.70502		*
NP_443167.2	5'-nucleotidase, cytosolic III-like [Source:RefSeq_peptide;Acc:NP_443167]	17.9316	57.7059	0.310742	-1.68621		*
VRK3	Serine/threonine-protein kinase VRK3 (EC 2.7.11.1) (Vaccinia-related kinase 3). [Source:Uniprot/SWISSPROT;Acc:Q8IV63]	142.651	457.665	0.311694	-1.6818		*
SALL2	Sal-like protein 2 (Zinc finger protein SALL2) (HSal2). [Source:Uniprot/SWISSPROT;Acc:Q9Y467]	36.0252	115.346	0.312323	-1.67889		*
CYP4X1	Cytochrome P450 4X1 (EC 1.14.14.1) (CYPIVX1). [Source:Uniprot/SWISSPROT;Acc:Q8N118]	10.4256	33.2922	0.313155	-1.67505		*
ABI3BP	Target of Nesh-SH3 precursor (Tarsh) (Nesh-binding protein) (NeshBP) (ABI gene family member 3-binding protein). [Source:Uniprot/SWISSPROT;Acc:Q7Z7G0]	12.9038	40.3911	0.319471	-1.64624		*
NP_112587.1	-	20.1759	63.1016	0.319737	-1.64504		*
HTRA3	Probable serine protease HTRA3 precursor (EC 3.4.21.-) (High- temperature requirement factor A3) (Pregnancy-related serine protease). [Source:Uniprot/SWISSPROT;Acc:P83110]	39.8335	120.431	0.330758	-1.59615		*
-	HDDC2 protein. [Source:Uniprot/SPTREMBL;Acc:Q9BV31]	12.8309	38.7254	0.33133	-1.59366		*
TCL1A	T-cell leukemia/lymphoma protein 1A (P14 TCL1 protein) (TCL1 oncogene) (TCL-1 protein). [Source:Uniprot/SWISSPROT;Acc:P56279]	10.5368	31.7769	0.331586	-1.59254		*
FDFT1	Squalene synthetase (EC 2.5.1.21) (SQS) (SS) (Farnesyl-diphosphate farnesyltransferase) (FPP:FPP farnesyltransferase). [Source:Uniprot/SWISSPROT;Acc:P37268]	49.7307	148.737	0.334353	-1.58056		*
-	-	7.97313	23.2005	0.343662	-1.54094		*
FUCA1	Tissue alpha-L-fucosidase precursor (EC 3.2.1.51) (Alpha-L-fucosidase I) (Alpha-L-fucoside fucohydrolase). [Source:Uniprot/SWISSPROT;Acc:P04066]	12.9882	37.7127	0.344399	-1.53785		*
ABCA7	-	29.8744	86.5878	0.345019	-1.53525		*
DTX4	DTX4 protein. [Source:Uniprot/SPTREMBL;Acc:Q0VF38]	35.5909	103.15	0.345041	-1.53516		*
SNX15	Sorting nexin-15. [Source:Uniprot/SWISSPROT;Acc:Q9NRS6]	16.5317	47.6781	0.346736	-1.52809		*
Q9NZK9_HUMAN	-	7.19942	20.7335	0.347237	-1.52601		*
MSH5	Protein G7d. [Source:Uniprot/SWISSPROT;Acc:Q5SSQ6]	10.8126	30.9747	0.349078	-1.51838		*
LRCH4	-	21.3131	61.0505	0.349106	-1.51826		*
Q86TI4_HUMAN	WD repeat domain 86 [Source:RefSeq_peptide;Acc:NP_938026]	22.3141	63.7406	0.350077	-1.51426		*
COX1_HUMAN	Cytochrome c oxidase subunit 1 (EC 1.9.3.1) (Cytochrome c oxidase polypeptide I). [Source:Uniprot/SWISSPROT;Acc:P00395]	6707.56	19095	0.351274	-1.50933		*
HLA-DQA2	HLA class II histocompatibility antigen, DQ(6) alpha chain precursor (DX alpha chain) (HLA-DQA1). [Source:Uniprot/SWISSPROT;Acc:P01906]	14.5085	41.2874	0.351403	-1.5088		*
HLA-DRA	major histocompatibility complex, class II, DR alpha precursor [Source:RefSeq_peptide;Acc:NP_061984]	16.0239	45.4662	0.352436	-1.50457		*
BEXL1	Protein BEX4 (Brain-expressed X-linked protein 4) (BEX1-like 1) (Nerve growth factor receptor-associated protein 3). [Source:Uniprot/SWISSPROT;Acc:Q9NWD9]	56.0913	158.427	0.354051	-1.49797		*
IBRDC2	E3 ubiquitin-protein ligase IBRDC2 (EC 6.3.2.-) (IBR domain-containing protein 2) (p53-inducible RING finger protein). [Source:Uniprot/SWISSPROT;Acc:Q7Z419]	14.0635	39.4537	0.356454	-1.48821		*
NP_612440.1	Major facilitator superfamily domain-containing protein 3. [Source:Uniprot/SWISSPROT;Acc:Q96ES6]	27.1686	75.8289	0.358288	-1.48081		*
MGST2	Microsomal glutathione S-transferase 2 (EC 2.5.1.18) (Microsomal GST- 2) (Microsomal GST-II). [Source:Uniprot/SWISSPROT;Acc:Q99735]	35.087	97.9106	0.358358	-1.48053		*
NP_060910.2	Phosphoprotein associated with glycosphingolipid-enriched microdomains 1 (Transmembrane adapter protein PAG) (Csk-binding protein) (Transmembrane phosphoprotein Cbp). [Source:Uniprot/SWISSPROT;Acc:Q9NWQ8]	10.61	29.5054	0.359594	-1.47556		*
KRT16	Keratin, type I cytoskeletal 16 (Cytokeratin-16) (CK-16) (Keratin-16) (K16). [Source:Uniprot/SWISSPROT;Acc:P08779]	19.7156	54.3433	0.362797	-1.46276		*
PLAT	Tissue-type plasminogen activator precursor (EC 3.4.21.68) (tPA) (t- PA) (t-plasminogen activator) (Alteplase) (Reteplase) [Contains: Tissue-type plasminogen activator chain A; Tissue-type plasminogen activator chain B]. [Source:Uniprot/SWISSPROT;Acc:P00750]	10.3919	28.6074	0.363258	-1.46093		*
ALPI	Intestinal alkaline phosphatase precursor (EC 3.1.3.1) (IAP). [Source:Uniprot/SWISSPROT;Acc:P09923]	28.1214	77.274	0.363918	-1.45831		*
NEIL2_HUMAN	Endonuclease VIII-like 2 (EC 3.2.2.-) (EC 4.2.99.18) (Nei-like 2) (DNA glycosylase/AP lyase Neil2) (DNA-(apurinic or apyrimidinic site) lyase Neil2) (NEH2). [Source:Uniprot/SWISSPROT;Acc:Q969S2]	62.8752	172.498	0.364497	-1.45602		*
ABCE1_HUMAN	ATP-binding cassette sub-family E member 1 (RNase L inhibitor) (Ribonuclease 4 inhibitor) (RNS4I) (2'-5' oligoadenylate-binding protein) (HuHP68). [Source:Uniprot/SWISSPROT;Acc:P61221]	14.2334	38.7606	0.367212	-1.44531		*
-	-	10.9495	29.6821	0.368892	-1.43873		*
NP_848641.1	-	8.21904	22.0898	0.372073	-1.42634		*
AKR1C3	Aldo-keto reductase family 1 member C3 (EC 1.-.-.-) (Trans-1,2- dihydrobenzene-1,2-diol dehydrogenase) (EC 1.3.1.20) (3-alpha- hydroxysteroid dehydrogenase type 2) (EC 1.1.1.213) (3-alpha-HSD type 2) (3-alpha-HSD type II, brain) (Prostaglandin F synthase) [Source:Uniprot/SWISSPROT;Acc:P42330]	14.677	39.4419	0.372117	-1.42617		*
PLAGL1	Zinc finger protein PLAGL1 (Pleiomorphic adenoma-like protein 1). [Source:Uniprot/SWISSPROT;Acc:Q9UM63]	11.916	31.6255	0.376785	-1.40819		*
RAI16	retinoic acid induced 16 [Source:RefSeq_peptide;Acc:NP_073586]	9.02204	23.9384	0.376886	-1.4078		*
TNRC4	trinucleotide repeat containing 4 [Source:RefSeq_peptide;Acc:NP_009116]	14.3734	38.0511	0.37774	-1.40454		*
-	HLA class II histocompatibility antigen, DQ(1) beta chain precursor (DC-3 beta chain). [Source:Uniprot/SWISSPROT;Acc:P01918]	8.39713	22.101	0.379944	-1.39614		*
NP_078792.1	Uncharacterized protein C16orf53. [Source:Uniprot/SWISSPROT;Acc:Q9BTK6]	9.5959	25.2212	0.38047	-1.39415		*
NP_006416.3	step II splicing factor SLU7 [Source:RefSeq_peptide;Acc:NP_006416]	18.8508	49.4946	0.380865	-1.39265		*
BCL7C	B-cell CLL/lymphoma 7 protein family member C. [Source:Uniprot/SWISSPROT;Acc:Q8WUZ0]	44.6694	116.039	0.384951	-1.37725		*
Q5VVE1_HUMAN	Filamin-binding LIM protein 1 (FBLP-1) (Mitogen-inducible 2- interacting protein) (MIG2-interacting protein) (Migfilin). [Source:Uniprot/SWISSPROT;Acc:Q8WUP2]	29.9634	77.6482	0.385886	-1.37375		*
ACAS2L	Acetyl-coenzyme A synthetase 2-like, mitochondrial precursor (EC 6.2.1.1) (Acetate--CoA ligase 2) (Acetyl-CoA synthetase 2) (Acyl- CoA synthetase short-chain family member 1). [Source:Uniprot/SWISSPROT;Acc:Q9NUB1]	44.5645	115.321	0.38644	-1.37168		*
APRT	Adenine phosphoribosyltransferase (EC 2.4.2.7) (APRT). [Source:Uniprot/SWISSPROT;Acc:P07741]	331.181	854.306	0.38766	-1.36713		*
NP_002956.1	Protein S100-A9 (S100 calcium-binding protein A9) (Calgranulin-B) (Migration inhibitory factor-related protein 14) (MRP-14) (P14) (Leukocyte L1 complex heavy chain) (Calprotectin L1H subunit). [Source:Uniprot/SWISSPROT;Acc:P06702]	117.453	298.302	0.393738	-1.34469		*
-	-	10.7936	27.3883	0.394093	-1.34339		*
C4orf14	Uncharacterized protein C4orf14. [Source:Uniprot/SWISSPROT;Acc:Q8NC60]	28.2606	71.4915	0.3953	-1.33898		*
Q6P575_HUMAN	Beta-glucuronidase precursor (EC 3.2.1.31) (Beta-G1). [Source:Uniprot/SWISSPROT;Acc:P08236]	26.5701	67.1965	0.39541	-1.33858		*
FTL	Ferritin light chain (Ferritin L subunit). [Source:Uniprot/SWISSPROT;Acc:P02792]	104.453	263.782	0.395981	-1.3365		*
BCL6	B-cell lymphoma 6 protein (BCL-6) (Zinc finger protein 51) (LAZ-3 protein) (BCL-5) (Zinc finger and BTB domain-containing protein 27). [Source:Uniprot/SWISSPROT;Acc:P41182]	32.18	80.8106	0.398215	-1.32838		*
HLA-DRA	HLA class II histocompatibility antigen, DR alpha chain precursor (MHC class II antigen DRA). [Source:Uniprot/SWISSPROT;Acc:P01903]	1162.76	2900.9	0.400827	-1.31895		*
NU4M_HUMAN	NADH-ubiquinone oxidoreductase chain 4 (EC 1.6.5.3) (NADH dehydrogenase subunit 4). [Source:Uniprot/SWISSPROT;Acc:P03905]	2244.88	5597.58	0.401045	-1.31816		*
CELSR2	Cadherin EGF LAG seven-pass G-type receptor 2 precursor (Epidermal growth factor-like 2) (Multiple epidermal growth factor-like domains 3) (Flamingo 1). [Source:Uniprot/SWISSPROT;Acc:Q9HCU4]	8.0653	20.0459	0.402341	-1.31351		*
NP_775854.1	CDNA FLJ33790 fis, clone BRSSN2009389, weakly similar to Homo sapiens Kelch motif containing protein. [Source:Uniprot/SPTREMBL;Acc:Q8NBB1]	12.8897	32.0357	0.402354	-1.31346		*
OCIAD2	OCIA domain containing 2 isoform 2 [Source:RefSeq_peptide;Acc:NP_689611]	49.0529	120.313	0.40771	-1.29438		*
HEBP2	Heme-binding protein 2 (Protein SOUL) (Placental protein 23) (PP23). [Source:Uniprot/SWISSPROT;Acc:Q9Y5Z4]	88.089	215.156	0.409419	-1.28835		*
OS9_HUMAN	Protein OS-9 precursor (Amplified in osteosarcoma 9). [Source:Uniprot/SWISSPROT;Acc:Q13438]	208.24	507.767	0.410108	-1.28592		*
COL16A1	Collagen alpha-1(XVI) chain precursor. [Source:Uniprot/SWISSPROT;Acc:Q07092]	40.6249	98.9131	0.410713	-1.2838		*
S100A11	Protein S100-A11 (S100 calcium-binding protein A11) (Protein S100C) (Calgizzarin) (MLN 70). [Source:Uniprot/SWISSPROT;Acc:P31949]	1957.12	4757.21	0.411401	-1.28138		*
Q8WYX0_HUMAN	-	19.8445	47.9253	0.414071	-1.27205		*
ARHGDIB	Rho GDP-dissociation inhibitor 2 (Rho GDI 2) (Rho-GDI beta) (Ly-GDI). [Source:Uniprot/SWISSPROT;Acc:P52566]	74.3292	178.723	0.415891	-1.26572		*
EMILIN1	EMILIN-1 precursor (Elastin microfibril interface-located protein 1) (Elastin microfibril interfacer 1). [Source:Uniprot/SWISSPROT;Acc:Q9Y6C2]	96.8357	232.802	0.415958	-1.26549		*
PSORS1C1	Psoriasis susceptibility 1 candidate gene 1 protein (SEEK1 protein). [Source:Uniprot/SWISSPROT;Acc:Q9UIG5]	21.2205	50.9442	0.416544	-1.26346		*
COL4A1	Collagen alpha-1(IV) chain precursor. [Source:Uniprot/SWISSPROT;Acc:P02462]	31.1728	73.4046	0.424671	-1.23558		*
ZNF593	Zinc finger protein 593 (Zinc finger protein T86). [Source:Uniprot/SWISSPROT;Acc:O00488]	20.4665	48.1594	0.424973	-1.23456		*
CYB_HUMAN	Cytochrome b. [Source:Uniprot/SWISSPROT;Acc:P00156]	23214.3	54544.5	0.425602	-1.23242		*
XP_370722.2	similar to RIKEN cDNA 8030451K01 (LOC387921), transcript variant 1, mRNA [Source:RefSeq_dna;Acc:NM_001012754]	10.2204	23.8902	0.427806	-1.22497		*
STOM	Erythrocyte band 7 integral membrane protein (Stomatin) (Protein 7.2b). [Source:Uniprot/SWISSPROT;Acc:P27105]	28.0225	65.3503	0.428804	-1.22161		*
O60536_HUMAN	Serine/threonine-protein kinase WNK2 (EC 2.7.11.1) (Protein kinase with no lysine 2) (Protein kinase, lysine-deficient 2). [Source:Uniprot/SWISSPROT;Acc:Q9Y3S1]	44.0802	102.766	0.428938	-1.22116		*
-	Tryptase alpha-1 precursor (EC 3.4.21.59) (Tryptase-1). [Source:Uniprot/SWISSPROT;Acc:P15157]	220.621	513.735	0.429445	-1.21946		*
Q16673_HUMAN	postmeiotic segregation increased 2-like 5 [Source:RefSeq_peptide;Acc:NP_777590]	19.7444	45.9727	0.429481	-1.21933		*
GADD45B	Growth arrest and DNA-damage-inducible protein GADD45 beta (Negative growth-regulatory protein MyD118) (Myeloid differentiation primary response protein MyD118). [Source:Uniprot/SWISSPROT;Acc:O75293]	32.2067	74.972	0.429582	-1.21899		*
KIAA0476	Novel protein, KIAA0476. [Source:Uniprot/SPTREMBL;Acc:Q5T4K0]	141.587	329.413	0.429816	-1.21821		*
CHRNA4	Neuronal acetylcholine receptor subunit alpha-4 precursor. [Source:Uniprot/SWISSPROT;Acc:P43681]	15.5837	36.1552	0.431023	-1.21416		*
MGP	Matrix Gla-protein precursor (MGP) (Cell growth-inhibiting gene 36 protein). [Source:Uniprot/SWISSPROT;Acc:P08493]	9.33058	21.5528	0.432917	-1.20784		*
AK1	Adenylate kinase isoenzyme 1 (EC 2.7.4.3) (ATP-AMP transphosphorylase) (AK1) (Myokinase). [Source:Uniprot/SWISSPROT;Acc:P00568]	95.7067	220.491	0.434062	-1.20403		*
NPC2_HUMAN	Epididymal secretory protein E1 precursor (Niemann-Pick disease type C2 protein) (hE1). [Source:Uniprot/SWISSPROT;Acc:P61916]	91.7734	208.361	0.440453	-1.18294		*
SLCO2A1	Solute carrier organic anion transporter family member 2A1 (Solute carrier family 21 member 2) (Prostaglandin transporter) (PGT). [Source:Uniprot/SWISSPROT;Acc:Q92959]	13.4226	30.4039	0.441478	-1.17959		*
ATP6_HUMAN	ATP synthase a chain (EC 3.6.3.14) (ATPase protein 6). [Source:Uniprot/SWISSPROT;Acc:P00846]	1317.7	2984.18	0.441563	-1.17931		*
MILK1_HUMAN	MICAL-like protein 1 (Molecule interacting with Rab13) (MIRab13). [Source:Uniprot/SWISSPROT;Acc:Q8N3F8]	205.868	462.319	0.445294	-1.16717		*
Q71RB1_HUMAN	PP7080. [Source:Uniprot/SPTREMBL;Acc:Q71RB1]	50.0107	111.36	0.449091	-1.15492		*
UBE2Q	Ubiquitin-conjugating enzyme E2 Q1 (EC 6.3.2.19) (Ubiquitin-protein ligase Q1) (Ubiquitin carrier protein Q1) (Protein NICE-5). [Source:Uniprot/SWISSPROT;Acc:Q7Z7E8]	32.6807	72.1312	0.453073	-1.14218		*
COX3_HUMAN	Cytochrome c oxidase subunit 3 (EC 1.9.3.1) (Cytochrome c oxidase polypeptide III). [Source:Uniprot/SWISSPROT;Acc:P00414]	1232.6	2713.68	0.454216	-1.13855		*
C6orf27	Protein G7c precursor. [Source:Uniprot/SWISSPROT;Acc:Q9Y334]	9.89394	21.7026	0.455886	-1.13325		*
ZSWIM3	Zinc finger SWIM domain-containing protein 3. [Source:Uniprot/SWISSPROT;Acc:Q96MP5]	9.29893	20.2983	0.458113	-1.12622		*
NU6M_HUMAN	NADH-ubiquinone oxidoreductase chain 6 (EC 1.6.5.3) (NADH dehydrogenase subunit 6). [Source:Uniprot/SWISSPROT;Acc:P03923]	76.4094	165.98	0.460353	-1.11919		*
KRTAP3-3	Keratin-associated protein 3-3 (Keratin-associated protein 3.3) (High sulfur keratin-associated protein 3.3). [Source:Uniprot/SWISSPROT;Acc:Q9BYR6]	102.713	223.106	0.460377	-1.11911		*
TRAIP_HUMAN	TRAF-interacting protein (RING finger protein 206). [Source:Uniprot/SWISSPROT;Acc:Q9BWF2]	18.5348	40.1008	0.462205	-1.1134		*
CAMTA2	Calmodulin-binding transcription activator 2. [Source:Uniprot/SWISSPROT;Acc:O94983]	37.9748	81.9685	0.463285	-1.11003		*
CSF3R	Granulocyte colony-stimulating factor receptor precursor (G-CSF-R) (CD114 antigen). [Source:Uniprot/SWISSPROT;Acc:Q99062]	19.0954	41.2102	0.463365	-1.10978		*
TIF1	Transcription intermediary factor 1-alpha (TIF1-alpha) (Tripartite motif-containing protein 24) (RING finger protein 82). [Source:Uniprot/SWISSPROT;Acc:O15164]	49.0144	105.648	0.463939	-1.10799		*
ARL3	ADP-ribosylation factor-like protein 3. [Source:Uniprot/SWISSPROT;Acc:P36405]	12.9642	27.8066	0.46623	-1.10089		*
DF	Complement factor D precursor (EC 3.4.21.46) (C3 convertase activator) (Properdin factor D) (Adipsin). [Source:Uniprot/SWISSPROT;Acc:P00746]	87.2242	186.09	0.46872	-1.0932		*
PIGA	Phosphatidylinositol N-acetylglucosaminyltransferase subunit A (EC 2.4.1.198) (GlcNAc-PI synthesis protein) (Phosphatidylinositol- glycan biosynthesis class A protein) (PIG-A). [Source:Uniprot/SWISSPROT;Acc:P37287]	17.4591	37.1536	0.469917	-1.08952		*
ZNF564	-	32.3765	68.8365	0.470339	-1.08823		*
XM_373497.3	-	384.241	813.663	0.472236	-1.08242		*
NULM_HUMAN	NADH-ubiquinone oxidoreductase chain 4L (EC 1.6.5.3) (NADH dehydrogenase subunit 4L). [Source:Uniprot/SWISSPROT;Acc:P03901]	220.532	465.913	0.473335	-1.07907		*
NP_115724.1	matrix-remodelling associated 8 [Source:RefSeq_peptide;Acc:NP_115724]	50.141	104.475	0.479931	-1.0591		*
TMED4	Transmembrane emp24 domain-containing protein 4 precursor. [Source:Uniprot/SWISSPROT;Acc:Q7Z7H5]	40.8223	84.5337	0.482912	-1.05017		*
CXCL16	Small inducible cytokine B16 precursor (Transmembrane chemokine CXCL16) (SR-PSOX) (Scavenger receptor for phosphatidylserine and oxidized low density lipoprotein). [Source:Uniprot/SWISSPROT;Acc:Q9H2A7]	10.5618	21.8532	0.483307	-1.04899		*
TUBA4	tubulin, alpha 4 (TUBA4) on chromosome 2 [Source:RefSeq_dna;Acc:NR_003063]	9.81993	20.1599	0.487102	-1.0377		*
MAP1LC3A	Microtubule-associated proteins 1A/1B light chain 3A precursor (MAP1A/MAP1B LC3 A) (MAP1A/1B light chain 3 A) (MAP1 light chain 3- like protein 1) (Microtubule-associated protein 1 light chain 3 alpha) (Autophagy-related protein LC3 A) (Autophagy-related [Source:Uniprot/SWISSPROT;Acc:Q9H492]	234.706	479.234	0.489753	-1.02987		*
NP_076934.1	Protein YIPF2 (YIP1 family member 2). [Source:Uniprot/SWISSPROT;Acc:Q9BWQ6]	48.1614	97.9107	0.491891	-1.02359		*
-	-	33.6249	68.3079	0.492255	-1.02252		*
KLC2_HUMAN	Kinesin light chain 2 (KLC 2). [Source:Uniprot/SWISSPROT;Acc:Q9H0B6]	47.0342	95.2767	0.493659	-1.01841		*
SLC29A4	solute carrier family 29 (nucleoside transporters), member 4 [Source:RefSeq_peptide;Acc:NP_694979]	15.2545	30.8532	0.494422	-1.01619		*
-	similar to nuclear pore membrane protein 121 (LOC392364), misc RNA [Source:RefSeq_dna;Acc:XR_015582]	22.3096	45.0593	0.495116	-1.01416		*
SIAH1	E3 ubiquitin-protein ligase SIAH1 (EC 6.3.2.-) (Seven in absentia homolog 1) (Siah-1) (Siah-1a). [Source:Uniprot/SWISSPROT;Acc:Q8IUQ4]	10.8409	21.8956	0.495116	-1.01416		*
